# Supplementary material for: Effect of radiotherapy after mastectomy and axillary surgery on 10-year recurrence and 20-year breast cancer mortality: meta-analysis of individual patient data for 8135 women in 22 randomised trials
Source: Lancet. 2014 Jun 20;383(9935):2127–35. doi: 10.1016/S0140-6736(14)60488-8 (PMC5015598; doi:10.1016/S0140-6736(14)60488-8)
Supplement: Supplementary appendix [file mmc1.pdf]

# THE LANCET

## Supplementary appendix

This appendix formed part of the original submission and has been peer reviewed. We post it as supplied by the authors.

Supplement to: EBCTCG (Early Breast Cancer Trialists' Collaborative Group). Effect of radiotherapy after mastectomy and axillary surgery on 10-year recurrence and 20-year breast cancer mortality: meta-analysis of individual patient data for 8135 women in 22 randomised trials. *Lancet* 2014; published online March 19. [http://dx.doi.org/10.1016/S0140-6736\(14\)60488-8](http://dx.doi.org/10.1016/S0140-6736(14)60488-8).

**This online publication has been corrected. The corrected version first appeared at [thelancet.com](http://thelancet.com) on Nov 21, 2014**

# Effect of radiotherapy after mastectomy and axillary surgery on 10-year recurrence and 20-year breast cancer mortality: meta-analysis of individual patient data for 8135 women in 22 randomised trials

EBCTCG (Early Breast Cancer Trialists' Collaborative Group)

## Webappendix

Webfigure 1      **Methodological note**

### **Trials of radiotherapy to the chest wall and regional lymph nodes versus not after mastectomy and axillary dissection (Mast+AD)**

Webtable 1      Randomised trials beginning before the year 2000 and comparing radiotherapy to the chest wall and regional lymph nodes versus not after mastectomy and axillary dissection (Mast+AD) or axillary sampling (Mast+AS) – treatment details.

#### ***Node negative (pN0)***

Webfigure 2      Effect of radiotherapy (RT) to the chest wall and regional lymph nodes versus not after mastectomy and axillary dissection (Mast+AD): 10-year risk of locoregional recurrence and recurrence of any type and 20-year risk of breast cancer and all-cause mortality in 700 women with pathologically node-negative (pN0) disease.

Webfigure 3      Effect of radiotherapy (RT) to the chest wall and regional lymph nodes versus not after mastectomy and axillary dissection (Mast+AD): 10-year risk of recurrence and type of first recurrence, by allocated treatment, in 700 women with pathologically node-negative (pN0) disease.

#### ***Node positive (pN+)***

Webfigure 4      Effect of radiotherapy (RT) to the chest wall and regional lymph nodes versus not after mastectomy and axillary dissection (Mast+AD): 10-year risk of locoregional recurrence and recurrence of any type and 20-year risk of breast cancer and all-cause mortality in 3131 women with pathologically node-positive (pN+) disease.

Webfigure 5      Effect of radiotherapy (RT) to the chest wall and regional lymph nodes versus not after mastectomy and axillary dissection (Mast+AD): 10-year risk of recurrence and type of first recurrence, by allocated treatment, in 3131 women with pathologically node-positive (pN+) disease.

Webfigure 6      Effect of radiotherapy (RT) to the chest wall and regional lymph nodes versus not after mastectomy and axillary dissection (Mast+AD): Event rate ratios and 95% confidence intervals for locoregional recurrence and recurrence of any type during years 0-9 and for breast cancer mortality in 3131 women with pathologically node-positive (pN+) disease by prognostic and other factors.

#### ***1-3 positive nodes (pN1-3)***

Webfigure 7      Effect of radiotherapy (RT) to the chest wall and regional lymph nodes versus not after mastectomy and axillary dissection (Mast+AD): 10-year risk of locoregional recurrence and recurrence of any type and 20-year risk of breast cancer and all-cause mortality in 1314 women with 1-3 pathologically positive nodes (pN1-3).

Webfigure 8      Effect of radiotherapy (RT) to the chest wall and regional lymph nodes versus not after mastectomy and axillary dissection (Mast+AD): 10-year risk of recurrence and type of first recurrence, by allocated treatment, in 1314 women with 1-3 pathologically positive nodes (pN1-3).

Webfigure 9      Effect of radiotherapy (RT) to the chest wall and regional lymph nodes versus not after mastectomy and axillary dissection (Mast+AD): Event rate ratios and 95% confidence intervals for locoregional recurrence and recurrence of any type during years 0-9 and for breast cancer mortality in 1314 women with 1-3 pathologically positive nodes (pN1-3) by prognostic and other factors.

***1-3 positive nodes (pN1-3) who received systemic therapy***

- Webfigure 10 Effect of radiotherapy (RT) to the chest wall and regional lymph nodes versus not after mastectomy and axillary dissection (Mast+AD): 10-year risk of locoregional recurrence and recurrence of any type and 20-year risk of breast cancer and all-cause mortality in 1133 women with 1-3 pathologically positive nodes (pN1-3) in trials where systemic therapy was given to both randomised treatment groups.
- Webfigure 11 Effect of radiotherapy (RT) to the chest wall and regional lymph nodes versus not after mastectomy and axillary dissection (Mast+AD): 10-year risk of recurrence and type of first recurrence, by allocated treatment, in 1133 women with 1-3 pathologically positive nodes (pN1-3) in trials where systemic therapy was given to both randomised treatment groups.

***1-3 positive nodes (pN1-3) who received systemic therapy subdivided according to number of positive nodes***

- Webfigure 12 Effect of radiotherapy (RT) to the chest wall and regional lymph nodes versus not after mastectomy and axillary dissection (Mast+AD): 10-year risk of locoregional recurrence and recurrence of any type and 15-year risk of breast cancer mortality in 1133 women with 1-3 pathologically positive nodes (pN1-3) in trials where systemic therapy was given to both randomised treatment groups subdivided according to number of positive nodes.
- Webfigure 13 Effect of radiotherapy (RT) to the chest wall and regional lymph nodes versus not after mastectomy and axillary dissection (Mast+AD): 10-year risk of recurrence and type of first recurrence, by allocated treatment, in 318 women with 1 pathologically positive node (pN1) and where systemic therapy was given to both randomised treatment groups.
- Webfigure 14 Effect of radiotherapy (RT) to the chest wall and regional lymph nodes versus not after mastectomy and axillary dissection (Mast+AD): 10-year risk of recurrence and type of first recurrence, by allocated treatment, in 365 women with 2-3 pathologically positive nodes (pN2-3) and where systemic therapy was given to both randomised treatment groups.
- Webfigure 15 Effect of radiotherapy (RT) to the chest wall and regional lymph nodes versus not after mastectomy and axillary dissection (Mast+AD): 10-year risk of recurrence and type of first recurrence, by allocated treatment, in 450 women with 1-3 pathologically positive nodes (pN1-3) but the exact number of positive nodes unknown and where systemic therapy was given to both randomised treatment groups.

***4+ positive nodes (pN4+)***

- Webfigure 16 Effect of radiotherapy (RT) to the chest wall and regional lymph nodes versus not after mastectomy and axillary dissection (Mast+AD): 10-year risk of locoregional recurrence and recurrence of any type and 20-year risk of breast cancer and all-cause mortality in 1772 women with 4+ pathologically positive nodes (pN4+).
- Webfigure 17 Effect of radiotherapy (RT) to the chest wall and regional lymph nodes versus not after mastectomy and axillary dissection (Mast+AD): 10-year risk of recurrence and type of first recurrence, by allocated treatment, in 1772 women with 4+ pathologically positive nodes (pN4+).
- Webfigure 18 Effect of radiotherapy (RT) to the chest wall and regional lymph nodes versus not after mastectomy and axillary dissection (Mast+AD): Event rate ratios and 95% confidence intervals for locoregional recurrence and recurrence of any type during years 0-9 and for breast cancer mortality in 1772 women with 4+ pathologically positive nodes (pN4+) by prognostic and other factors.

***4+ positive nodes (pN4+) who received systemic therapy***

- Webfigure 19 Effect of radiotherapy (RT) to the chest wall and regional lymph nodes versus not after mastectomy and axillary dissection (Mast+AD): 10-year risk of locoregional recurrence and recurrence of any type and 20-year risk of breast cancer and all-cause mortality in 1677 women with 4+ pathologically positive nodes (pN4+) in trials where systemic therapy was given to both randomised treatment groups.
- Webfigure 20 Effect of radiotherapy (RT) to the chest wall and regional lymph nodes versus not after mastectomy and axillary dissection (Mast+AD): 10-year risk of recurrence and type of first recurrence, by allocated treatment, in 1677 women with 4+ pathologically positive nodes (pN4+) in trials where systemic therapy was given to both randomised treatment groups.

***4+ positive nodes (pN4+) who received systemic therapy subdivided according to number of positive nodes***

- Webfigure 21 Effect of radiotherapy (RT) to the chest wall and regional lymph nodes versus not after mastectomy and axillary dissection (Mast+AD): 10-year risk of locoregional recurrence and recurrence of any type and 15-year risk of breast cancer mortality in 1677 women with 4+ pathologically positive nodes (pN4+) in trials where systemic therapy was given to both randomised treatment groups subdivided according to number of positive nodes.

- Webfigure 22 Effect of radiotherapy (RT) to the chest wall and regional lymph nodes versus not after mastectomy and axillary dissection (Mast+AD): 10-year risk of recurrence and type of first recurrence, by allocated treatment, in 479 women with 4-9 pathologically positive nodes (pN4-9) in trials where systemic therapy was given to both randomised treatment groups.
- Webfigure 23 Effect of radiotherapy (RT) to the chest wall and regional lymph nodes versus not after mastectomy and axillary dissection (Mast+AD): 10-year risk of recurrence and type of first recurrence, by allocated treatment, in 403 women with 10+ pathologically positive nodes (pN10+) in trials where systemic therapy was given to both randomised treatment groups.
- Webfigure 24 Effect of radiotherapy (RT) to the chest wall and regional lymph nodes versus not after mastectomy and axillary dissection (Mast+AD): 10-year risk of recurrence and type of first recurrence, by allocated treatment, in 795 women with 4+ pathologically positive nodes but the exact number of positive nodes unknown in trials where systemic therapy was given to both randomised treatment groups.

### **Trials of radiotherapy to the chest wall and regional lymph nodes versus not after mastectomy and axillary sampling (Mast+AS)**

- Node negative (pN0)**
- Webfigure 25 Effect of radiotherapy (RT) to the chest wall and regional lymph nodes versus not after mastectomy and axillary sampling (Mast+AS): 10-year risk of locoregional recurrence and recurrence of any type and 20-year risk of breast cancer and all-cause mortality in 870 women with pathologically node-negative (pN0) disease.
- Webfigure 26 Effect of radiotherapy (RT) to the chest wall and regional lymph nodes versus not after mastectomy and axillary sampling (Mast+AS): 10-year risk of recurrence and type of first recurrence, by allocated treatment, in 870 women with pathologically node negative (pN0) disease.
- Node positive (pN+)**
- Webfigure 27 Effect of radiotherapy (RT) to the chest wall and regional lymph nodes versus not after mastectomy and axillary sampling (Mast+AS): 10-year risk of locoregional recurrence and recurrence of any type and 20-year risk of breast cancer and all-cause mortality in 2541 women with pathologically node-positive (pN+) disease.
- Webfigure 28 Effect of radiotherapy (RT) to the chest wall and regional lymph nodes versus not after mastectomy and axillary sampling (Mast+AS): 10-year risk of recurrence and type of first recurrence, by allocated treatment, in 2541 women with pathologically node-positive (pN+) disease.

### **Trials of radiotherapy to the chest wall and regional lymph nodes versus not after mastectomy and axillary dissection (Mast+AD) or axillary sampling (Mast+AS). Event rate ratios, one line per trial.**

- Webfigure 29 Effect of radiotherapy (RT) to the chest wall and regional lymph nodes versus not after mastectomy and axillary dissection (Mast+AD) or axillary sampling (Mast+AS): Event rate ratios, one line per trial, for locoregional recurrence and recurrence of any type during years 0-9 and for breast cancer and all-cause mortality in 1594 women with pathologically node-negative (pN0) disease.
- Webfigure 30 Effect of radiotherapy (RT) to the chest wall and regional lymph nodes versus not after mastectomy and axillary dissection (Mast+AD) or axillary sampling (Mast+AS): Event rate ratios, one line per trial, for locoregional recurrence and recurrence of any type during years 0-9 and for breast cancer and all-cause mortality in 5821 women with pathologically node-positive (pN+) disease.
- Webfigure 31 Effect of radiotherapy (RT) to the chest wall and regional lymph nodes versus not after mastectomy and axillary dissection (Mast+AD) or axillary sampling (Mast+AS): Event rate ratios, one line per trial, for locoregional recurrence and recurrence of any type during years 0-9 and for breast cancer and all-cause mortality in 2801 women with 1-3 pathologically positive nodes (pN1-3).
- Webfigure 32 Effect of radiotherapy (RT) to the chest wall and regional lymph nodes versus not after mastectomy and axillary dissection (Mast+AD) or axillary sampling (Mast+AS): Event rate ratios, one line per trial, for locoregional recurrence and recurrence of any type during years 0-9 and for breast cancer and all-cause mortality in 2557 women with 4+ pathologically positive nodes (pN4+).
- Webfigure 33 Effect of radiotherapy (RT) to the chest wall and regional lymph nodes versus not after mastectomy and axillary dissection (Mast+AD) or axillary sampling (Mast+AS): Event rate ratios, one line per trial, for locoregional recurrence and recurrence of any type during years 0-9 and for breast cancer and all-cause mortality in 463 women with pathologically positive nodes (pN?+) but unknown if they were 1-3 or 4+ positive.

Webfigure 34 Effect of radiotherapy (RT) to the chest wall and regional lymph nodes versus not after mastectomy and axillary dissection (Mast+AD) or axillary sampling (Mast+AS): Event rate ratios, one line per trial, for locoregional recurrence and recurrence of any type during years 0-9 and for breast cancer and all-cause mortality in 720 women with unknown pathological nodal status (pN?).

## **Trials of radiotherapy to the regional lymph nodes alone versus not after mastectomy and axillary dissection (Mast+AD)**

Webtable 2 Availability of data from randomised trials beginning before the year 2000 and comparing radiotherapy to the regional lymph nodes alone versus not after mastectomy and axillary dissection (Mast+AD) or axillary sampling (Mast+AS).

Webtable 3 Randomised trials beginning before the year 2000 and comparing radiotherapy to the regional lymph nodes alone versus not after mastectomy and axillary dissection (Mast+AD) or axillary sampling (Mast+AS) – treatment details.

### ***Node negative (pN0)***

Webfigure 35 Effect of radiotherapy (RT) to the regional lymph nodes alone versus not after mastectomy and axillary dissection (Mast+AD): 10-year risk of locoregional recurrence and recurrence of any type and 20-year risk of breast cancer and all-cause mortality in 465 women with pathologically node-negative (pN0) disease.

Webfigure 36 Effect of radiotherapy (RT) to the regional lymph nodes alone versus not after mastectomy and axillary dissection (Mast+AD): 10-year risk of recurrence and type of first recurrence, by allocated treatment, in 465 women with pathologically node-negative (pN0) disease.

### ***Node positive (pN+)***

Webfigure 37 Effect of radiotherapy (RT) to the regional lymph nodes alone versus not after mastectomy and axillary dissection (Mast+AD): 10-year risk of locoregional recurrence and recurrence of any type and 20-year risk of breast cancer and all-cause mortality in 1029 women with pathologically node-positive (pN+) disease.

Webfigure 38 Effect of radiotherapy (RT) to the regional lymph nodes alone versus not after mastectomy and axillary dissection (Mast+AD): 10-year risk of recurrence and type of first recurrence, by allocated treatment, in 1029 women with pathologically node positive (pN+) disease.

### ***Event rate ratios, one line per trial***

Webfigure 39 Effect of radiotherapy (RT) to the regional lymph nodes alone versus not after mastectomy and axillary dissection (Mast+AD) or axillary sampling (Mast+AS): Event rate ratios, one line per trial, for locoregional recurrence and recurrence of any type during years 0-9 and for breast cancer and all-cause mortality in 465 women with pathologically node-negative (pN0) disease.

Webfigure 40 Effect of radiotherapy (RT) to the regional lymph nodes alone versus not after mastectomy and axillary dissection (Mast+AD) or axillary sampling (Mast+AS): Event rate ratios, one line per trial, for locoregional recurrence and recurrence of any type during years 0-9 and for breast cancer and all-cause mortality in 1029 women with pathologically node-positive (pN+) disease.

Webfigure 41 Effect of radiotherapy (RT) to the regional lymph nodes alone versus not after mastectomy and axillary dissection (Mast+AD) or axillary sampling (Mast+AS): Event rate ratios, one line per trial, for locoregional recurrence and recurrence of any type during years 0-9 and for breast cancer and all-cause mortality in 810 women unknown with pathological nodal status (pN?).

## **Trials of radiotherapy to the chest wall and regional lymph nodes versus not after mastectomy alone (Mast alone)**

Webtable 4 Availability of data from randomised trials beginning before the year 2000 and comparing radiotherapy to the regional lymph nodes alone versus not after mastectomy but no axillary surgery (Mast).

Webtable 5 Randomised trials beginning before the year 2000 and comparing radiotherapy to the chest wall and regional lymph nodes versus not after mastectomy but no axillary surgery (Mast) – treatment details.

***Clinically node positive (cN+)***

- Webfigure 42 Effect of radiotherapy (RT) to the chest wall and regional lymph nodes versus not after mastectomy but no axillary surgery (Mast): 10-year risk of locoregional recurrence and recurrence of any type and 20-year risks of breast cancer and all-cause mortality in 2896 women with clinically node-negative (cN-) disease.
- Webfigure 43 Effect of radiotherapy (RT) to the chest wall and regional lymph nodes versus not after mastectomy but no axillary surgery (Mast): 10-year risk of recurrence and type of first recurrence in 2896 women with clinically node-negative (cN-) disease.

***Clinically node negative (cN-)***

- Webfigure 44 Effect of radiotherapy (RT) to the chest wall and regional lymph nodes versus not after mastectomy but no axillary surgery (Mast): 10-year risk of locoregional recurrence and recurrence of any type and 20-year risks of breast cancer and all-cause mortality in 1481 women with clinically node-positive (cN+) disease.
- Webfigure 45 Effect of radiotherapy (RT) to the chest wall and regional lymph nodes versus not after mastectomy but no axillary surgery (Mast): 10-year risk of recurrence and type of first recurrence in 1481 women with clinically node-positive (cN+) disease.

**Trials of radiotherapy to the regional lymph nodes alone versus not after mastectomy alone (Mast alone)**

- Webtable 6 Availability of data from randomised trials beginning before the year 2000 and comparing radiotherapy to the regional lymph nodes alone versus not after mastectomy but no axillary surgery (Mast).
- Webtable 7 Randomised trials beginning before the year 2000 and comparing radiotherapy to the regional lymph nodes alone versus not after mastectomy but no axillary surgery (Mast) – treatment details.
- Webfigure 46 Effect of radiotherapy (RT) to the regional lymph nodes alone versus not after mastectomy but no axillary surgery (Mast): 10-year risks of recurrence, breast cancer and all-cause mortality in 192 clinically node-positive (cN+) women. Note, due to the very small number (8) of clinically node-negative women in this set of trials they are shown only in webfigure 34.
- Webfigure 47 Effect of radiotherapy (RT) to the regional lymph nodes versus not after mastectomy but no axillary surgery (Mast): 10-year risk of recurrence and type of first recurrence in 192 women with clinically node-positive (cN+) disease.
- Webfigure 48 Effect of radiotherapy (RT) versus not after mastectomy but no axillary surgery (Mast): 10 year risks of recurrence during years 0-9, breast cancer mortality, and all-cause mortality in 2904 women with clinically node-negative (cN-) disease. Event rate ratios, one line per trial, trial subdivided according to whether or not radiotherapy was given to the chest wall.
- Webfigure 49 Effect of radiotherapy (RT) versus not after mastectomy but no axillary surgery (Mast): 10 year risks of recurrence during years 0-9, breast cancer mortality, and all-cause mortality in 1673 women with clinically node-positive (cN+) disease. Event rate ratios, one line per trial, trial subdivided according to whether or not radiotherapy was given to the chest wall.

**Trials of radiotherapy to the chest wall and regional lymph nodes versus not BEFORE mastectomy and axillary dissection (Mast+AD) or axillary sampling (Mast+AS)**

- Webtable 8 Availability of data from randomised trials beginning before the year 2000 and comparing radiotherapy to the chest wall and regional lymph nodes versus not before mastectomy and axillary dissection (Mast+AD) or axillary sampling (Mast+AS).
- Webtable 9 Randomised trials beginning before the year 2000 and comparing radiotherapy to the chest wall and regional lymph nodes versus not before mastectomy and axillary dissection (Mast+AD) or axillary sampling (Mast+AS) – treatment details.
- Webfigure 50 Effect of radiotherapy (RT) to the chest wall and regional lymph nodes versus not before mastectomy and axillary dissection (Mast+AD): 10-year risk of locoregional recurrence and recurrence of any type and 15-year risk of breast cancer and all-cause mortality in 255 women with unknown pathological nodal status (pN?) disease.
- Webfigure 51 Effect of radiotherapy (RT) to the chest wall and regional lymph nodes versus not before mastectomy and axillary dissection (Mast+AD): 10-year risk of

|              |                                                                                                                                                                                                                                                                                                                                                                                                                                                                    |
|--------------|--------------------------------------------------------------------------------------------------------------------------------------------------------------------------------------------------------------------------------------------------------------------------------------------------------------------------------------------------------------------------------------------------------------------------------------------------------------------|
| Webfigure 52 | recurrence and type of first recurrence, by allocated treatment, in 255 women with unknown pathological nodal status (pN?).<br>Effect of radiotherapy (RT) to the chest wall and regional lymph nodes versus not before mastectomy and axillary sampling (Mast+AS): 10-year risk of locoregional recurrence and recurrence of any type and 15-year risk of breast cancer and all-cause mortality in 637 women with unknown pathological nodal status (pN?) disease |
| Webfigure 53 | Effect of radiotherapy (RT) to the chest wall and regional lymph nodes versus not before mastectomy and axillary sampling (Mast+AS): 10-year risk of recurrence and type of first recurrence, by allocated treatment, in 637 women with unknown pathological nodal status (pN?).                                                                                                                                                                                   |
| Webfigure 54 | Effect of radiotherapy (RT) to the chest wall and regional lymph nodes versus not before mastectomy and axillary dissection (Mast+AD) or axillary sampling (Mast+AS): Event rate ratios, one line per trial, for locoregional recurrence and recurrence of any type during years 0-9 and for breast cancer and all-cause mortality in 892 women with unknown pathological nodal status (pN?).                                                                      |
| Webfigure 55 | <b>EBCTCG collaborators, listed alphabetically by institution and then alphabetically by name.</b>                                                                                                                                                                                                                                                                                                                                                                 |

## Webfigure 1. Methodological Note

The analyses presented in the main body of the accompanying paper and also in many of the figures in this webappendix are based on the methodology that has been used throughout by the Early Breast Cancer Trialists' Collaborative Group (EBCTCG) and which is described elsewhere.<sup>1</sup> Some of the figures in this webappendix also include additional methodological features. The purpose of this note is to point out some of the features of both types of analysis.

### Overall Mortality

In analyses of overall mortality (eg, the lower right-hand panels of webfigures 2, 4, etc), the number of women who are known to have died in each randomised group is related to the number of women at risk of dying and the length of time during which they are at risk of dying in each time-period during follow-up. Some women are, however, lost to follow-up and are withdrawn from the analysis. Thus, whilst it is reported in the lower right-hand panel of webfigure 4 that the cumulative risk of death from any cause among the 1550 women randomised to radiotherapy is 65.4% at 20 years after randomisation, this does not mean that 1014 (ie  $0.654 \times 1550$ ) of the women are known to have died. Rather, as shown in webfigure 30, only 1001 (ie 64.6%) of the women are known to have died. The difference between these two percentages is due to the fact that for 390 of these 1550 women the most recent information held in the EBCTCG database indicates only that they were known to be alive at some period less than 20 years after randomisation. These women were withdrawn from the analysis or 'censored' on the date they were last known to be alive. Each censored woman is no longer considered to be at risk of dying after her date of censoring and she is excluded from all calculations relating to subsequent time-periods and, in particular, from contributing to the number of years at risk in calculations of the death rate. The technique of censoring has been used routinely by statisticians and actuaries for many decades and theoretical calculations have shown that it is valid, provided that the women who are censored are not different in any respect that affects their mortality rate from the women who remain in the study so that, from the mathematical point of view, the censoring can be considered to be 'at random'. This assumption is unlikely ever to be precisely true but many of the major factors affecting risk of overall mortality, such as trial, follow-up year, age at trial entry, and nodal status, can be taken into account through stratification, ie by subdividing the data into separate groups according to the stratifying factors, carrying out the analysis separately within each stratum and then combining the results from the separate strata in the form of a weighted average, calculated with weights proportional to the amount of information in each stratum.

### Mortality from Causes other than Breast Cancer

Analyses of causes of death other than breast cancer (eg EBCTCG, Lancet 2000; 355:1757-70, and 2005; 366: 2087-2106) are carried out in a fashion similar to that for analyses of overall mortality. Here, however, it is not only women who are lost to follow-up who are censored but all women who have a recurrence of their breast cancer are also censored on the date of that recurrence. This approach enables comparison of mortality rates from non-breast-cancer causes in the two trial arms. However, the resulting estimates of the cumulative risk of death from all non-breast-cancer causes (eg figure 6 lower panel of EBCTCG, Lancet 2000; 355:1757-70) reflect the cumulative risks that would be seen under the hypothetical scenario that no women in the trial die from breast cancer. This scenario is, of course, highly artificial. It is, however, a useful one in that it permits comparison of non-breast-cancer mortality rates in the two trial arms unencumbered by any differences in the rates of breast cancer recurrence/mortality. It therefore enables identification and characterization of specific treatment hazards such as the increased mortality from heart disease or second cancers that has undoubtedly occurred following some of the radiotherapy regimens used in the past (EBCTCG, Lancet 2005; 366: 2087-2106).

### Breast Cancer Mortality

The method used in the EBCTCG meta-analyses for studying mortality from breast cancer (eg right-hand panels of figures 1, 2, 4 and lower left-hand panels of webfigures 2, 4, etc) is indirect and makes use of analyses of the two endpoints described above. The data are first subdivided into separate strata (eg, according to trial, follow-up year, age at trial entry, and nodal status). Then, for each trial arm, the mortality rate from non-breast-cancer causes during the period prior to any recurrence of breast cancer is subtracted from the overall mortality rate in the relevant stratum. This method has the advantage that it avoids the difficulties which arise for women who die after a recurrence of their breast cancer and where it is not entirely clear whether their death was, in fact, due to the cancer or due to other causes. As in analyses of non-breast-cancer mortality, the resulting estimates of the cumulative risk of death from breast cancer reflect the cumulative risks that would be seen under the hypothetical scenario that no women in the trial die from causes other than breast cancer. Once again, this is useful in the identification and characterization of the benefits of a randomised treatment separately from its hazards. It also allows comparison of the benefits of the randomised treatment separately from the effects of other factors, such as the increasing overall mortality rate that occurs in all populations with increasing attained age.

continued overleaf

Separate calculation of the effect of a particular treatment on breast cancer mortality and on non-breast-cancer causes can also have substantial advantages even when the main question of interest is the effect of a treatment on overall mortality. For example, information from randomised trials on the effect of radiotherapy in reducing breast cancer mortality can be combined with epidemiological information from other sources on the likely risk of death from the long-term adverse effects of radiotherapy, such as second primary cancers or heart disease.

### **Analyses of Overall Recurrence**

Analyses of overall recurrence are presented in both the main paper (eg middle panels of figures 1,2 and 4) and in the webappendix (upper right panel of webfigures 2, 4, etc). Rather than using the indirect approach that is taken for analyses of breast cancer mortality, these analyses are carried out in a fashion similar to the analyses of mortality from non-breast-cancer causes in that the first reported recurrence of any type is related to the number of women who have not yet had a recurrence but who, if they did have one, would contribute an event. Women are censored and cease to contribute either events or years at risk after they have had a recurrence, die from a cause other than breast cancer, or are lost to follow-up. Any women who are reported as dying from breast cancer and for whom no recurrence has previously been reported are assumed to have had a distant recurrence immediately preceding their death. As with analyses of mortality from breast cancer and from causes other than breast cancer, these analyses lead to estimates of the cumulative risk of recurrence that would occur under the hypothetical scenario in which no other events occur. For analyses of overall recurrence this involves the assumption that no women in the trial die from causes other than breast cancer. This is similar to the assumption that is made for analyses of breast cancer mortality and, once again, although this assumption is unrealistic it is useful in that it enables identification and characterization of the benefits of the randomised treatment separately from its hazards.

### **Analyses of Locoregional and Distant Recurrence**

Analyses of locoregional recurrence are also presented both in the main paper (eg left panel of figures 1,2 and 4) and in the webappendix (upper left panel of webfigures 2, 4, etc). These analyses are carried out in similar fashion to the analyses of overall recurrence described above. Only locoregional recurrences that occur before any distant recurrence are counted as events, and women are censored and cease to contribute events or to the years at risk after they have had one recurrence (either a local or a distant one), or they die from a cause other than breast cancer or are lost to follow-up. The interpretation of analyses of locoregional recurrence is in some respects, similar to that for overall recurrence and breast cancer mortality. Two aspects do, however, differ and, in some contexts it is important to be aware of them. These two aspects are discussed in the following two paragraphs.

Firstly, because estimates of the cumulative risk of locoregional recurrence make the hypothetical assumption that no distant recurrences occur, they over-estimate the cumulative risk of locoregional recurrence. In many circumstances, including most of the analyses presented in this paper and in these webappendices, this is by no means realistic as the number of women whose first recurrence is a distant one is substantial. Insight into the extent of this effect can be gained by considering the distribution of the two different types of recurrence in analyses of overall recurrence, and such analyses have been carried out to accompany all the analyses of locoregional recurrence presented in this paper. For example, webfigure 5 accompanies the analysis of locoregional recurrence shown in the bottom left panel of figure 1 (and also in the top left panel of webfigure 4). The estimated 10-year risk of a recurrence of any type is 62.5% among the women randomised to no radiotherapy (webfigure 5, right-hand panel), of which distant recurrence accounts for 43.1% and locoregional recurrence accounts for the remaining 19.4%. If distant recurrences are censored, as in the analyses of locoregional recurrences, the estimated 10-year risk of locoregional recurrence in this particular example, is 26.0% (bottom left panel of figure 1 and top left panel of webfigure 4). This is 6.6% higher (ie, 26.0% in figure 1 minus 19.4% in webfigure 5) than the estimate derived from an analysis that takes distant recurrences into account.

Secondly, as can be seen in webfigure 5, the 10-year risk of distant recurrence differs between the two treatment groups and in this example, the 10-year risk of distant recurrence is 46.9% among the women allocated to receive radiotherapy and 43.1% among the women allocated not to receive it, ie, the 10-year risk of a distant recurrence is *higher* in the women randomised to receive radiotherapy than in the women randomised to no radiotherapy. This does not, however, mean that radiotherapy increases the risk of distant recurrence. Rather, it arises from the fact that a proportion of the women who would have had a locoregional recurrence if they had not had radiotherapy have their locoregional recurrence prevented by radiotherapy. These women remain at risk of a distant recurrence for longer and their additional time at risk is taken into account by the fact that, while they remain at risk of a distant recurrence, they continue to contribute to the years at risk and to the denominator in calculation of event rates. However, women who are at a higher risk of locoregional recurrence (eg, because they have more aggressive cancers) are also at a higher risk of distant recurrence. Therefore, the additional contribution to the years at risk from these women whose locoregional recurrence was prevented by the radiotherapy does not compensate fully for the additional risk of distant recurrence that is observed among the women allocated to radiotherapy. Hence the censoring that arises from the distant recurrences cannot be considered to be 'at random'. The relationship between the risks of locoregional and distant recurrence is unknown, either in the presence of radiotherapy or in its absence – and indeed the relationship is likely to differ between the two. Furthermore, the data from the trial provide no information about this relationship. Therefore it is not possible to carry out analyses of locoregional recurrence that take appropriate account of the occurrence of distant recurrences as a first event

event, or vice versa. One consequence of this is that, in analyses of locoregional recurrence as a first event (left-hand panels of figures 1, 2, & 5 and top left panels of webfigures 2, 4, 7, 10, 12, 16, 19, 21, 25, 27, 35, 37, 42, 44 and 46), the difference between the cumulative risks in the two treatment arms is a consequence not only of the causal effect of radiotherapy on the local recurrence rate in the two treatment arms, but also of the different extent to which distant recurrence as a first event occurs in each of the two treatment arms. This has consequences both for the interpretation of cumulative risks arising from the analysis of locoregional recurrence and for the interpretation of analyses presenting the ratio of the local recurrence rate in the irradiated group compared with the unirradiated group (figures 3, and 5 and webfigures 30, 6, 9, 18, 29, 30, 31, 32, 33, 34, 39, 40, 41, 48, 49). Analyses of recurrence presenting explicitly the percentages of women whose first recurrence was locoregional or distant respectively are therefore given in this webappendix (webfigures 3,5,8,11,13, 14, 15, 17, 20, 22, 23, 24, 26, 28, 36, 38, 43, 45, 47)

These ideas are not new, but they have not previously been considered in the context of the EBCTCG analyses. A selection of papers either discussing the methodological aspects involved or applying them to other data sets is given below.

- Fisher B, Anderson S, Redmond CK, Wolmark N, Wickerham DL, Cronin WM. Reanalysis and result after 12 years of follow-up in a randomized clinical trial comparing total mastectomy with lumpectomy with or without irradiation in the treatment of breast cancer. *N Engl J Med* 1995; **30**: 1456-1461.
- Gelman R, Gelber R, Henderson IC, Coleman CN, Harris JR. Improved methodology for analyzing local and distant recurrence. *J Clin Oncol* 1990; **8**: 548-555.
- Moeschberger ML, Klein JP. Statistical methods for dependent competing risks. *Lifetime Data Anal* 1995; **1**: 195-204.
- Panzarella T, Meakin JW. Analysis of cause-specific failure endpoints using simple proportions: an example from a randomized controlled clinical trial in early breast cancer. *Int J Radiat Oncol Biol Phys* 1998; **41**: 1093-97.
- Peterson AV. Bounds for a joint distribution function with fixed sub-distribution functions: Application to competing risks. *Proc Natl Acad Sci U S A* 1976; **73**: 11-13.
- Prentice RL, Kalbfleisch JD, Peterson AV, Flournoy N, Farewell VT, Breslow NE. The analysis of failure times in the presence of competing risks. *Biometrics* 1978; **34**: 541-554.
- Schulgen G, Schomoor C, Sauerbrei W, Schumacher M. A note on estimating local recurrence rates in clinical trials on the treatment of breast cancer. *Breast Cancer Res Treat* 1998; **49**: 87-91.
- Tsiatis A. A nonidentifiability aspect of the problem of competing risks. *Proc Natl Acad Sci U S A* 1975; **72**: 20-22.
- Dignam JJ, Kocherginsky MN. Choice and interpretation of statistical tests used when competing risks are present. *J Clin Oncol* 2008; **26**: 4027-34.
- Putter H, Fiocco M, Geskus RB. Tutorial in biostatistics. *Stat Med* 2007; **26**: 2389-430.

## Reference

1. <http://www.ctsu.ox.ac.uk/research/meta-trials/ebctcg/original-methods-for-ebctcg-meta-analyses>

**Webtable 1: Randomised trials beginning before the year 2000 and comparing radiotherapy to the chest wall and regional lymph nodes versus not after mastectomy and axillary dissection (Mast+AD) or axillary sampling (Mast+AS) – treatment details.**

| Year code and study name | Breast surgery        | Axillary Surgery* (number of patients) | Chest wall RT                  | Supraclavicular (SC) and axillary fossa (AF) RT | Internal mammary chain RT      | Boost RT to scar | Common systemic chemoendocrine therapy               |
|--------------------------|-----------------------|----------------------------------------|--------------------------------|-------------------------------------------------|--------------------------------|------------------|------------------------------------------------------|
| 64B Oslo X-ray           | RM                    | Axillary dissection (552)              | 25-41 Gy (1.3-2.1 Gy/f) o      | 36 Gy (1.8 Gy/f) o, SC; 18 Gy (u Gy/f) o, AF    | 25-41 Gy (1.3-2.1 Gy/f) o      | None             | Ovarian RT                                           |
| 71B Stockholm A          | MRM                   | Axillary sampling (644)                | 45 Gy (1.8 Gy/f) e             | 45 Gy de (1.8 Gy/f) c                           | 45 Gy (1.8 Gy/f) e             | None             | None                                                 |
| 73A Southampton UK       | SM                    | Axillary sampling (151)                | 46 Gy (2.3 Gy/f) c             | 55 Gy (2.5 Gy/f) c & b                          | 46 Gy (2.3 Gy/f) c             | None             | None                                                 |
| 74B Edinburgh I          | SM                    | Axillary sampling (348)                | 42.5-45.0 Gy (4.25-4.5 Gy/f) m | 42.5-45.0 Gy (4.25-4.5 Gy/f) m                  | None                           | None             | F                                                    |
| 74D DFCI Boston          | MRM or RM             | Axillary dissection (218)              | 45 Gy (2.3 Gy/f) c or m        | 45 Gy (2.3 Gy/f) c or m                         | 0-45 Gy (0-2.3 Gy/f) c or m    | None             | Either (AC) 5 cycles or (AC) 10 cycles; or CMF or MF |
| 74Q Piedmont OA (pN4+)   | MRM or RM             | Axillary dissection (120)              | 50 Gy (1.5-1.8 Gy/f) c or m    | 45-50 Gy (1.5-2.8 Gy/f) c or m                  | 45-50 Gy (1.8-2.8 Gy/f) c or m | None             | Mel or CMF                                           |
| 76A SECSG 1              | MRM or RM             | Axillary dissection (257)              | 50 Gy (2 Gy/f) u               | 50 Gy (2 Gy/f) u                                | 50 Gy (2 Gy/f) u               | None             | CMF                                                  |
| 76C Glasgow              | SM                    | Axillary dissection (219)              | 37.8 Gy (2.5 Gy/f) o           | 37.8 Gy (2.5 Gy/f) o                            | 37.8 Gy (2.5 Gy/f) o           | None             | CMF                                                  |
| 77J MD Ander. 7730B      | MRM or SM             | Axillary dissection ( 80)              | 45-50 Gy (1.8-2.0 Gy/f) c      | 45-50 Gy (1.8-2 Gy/f) c                         | 45-50 Gy (1.8-2 Gy/f) c or e   | 12 Gy (uGy/f) u  | bCG+FAC or FAC                                       |
| 78A S Swedish BCG        | MRM                   | Axillary dissection (771)              | 38 Gy (1.9 Gy/f) e,o,m or c    | 48-60 Gy (2.4 Gy/f) c or m                      | 48 Gy (2.4 Gy/f) e, c or m     | None             | Premen: C; Postmen: tam                              |
| 78G BCCA Vancouver       | MRM                   | Axillary dissection (318)              | 37.5-40 Gy (2.3 Gy/f) c or m   | 37.5 Gy de (2.2 Gy/f) c or m                    | 37.5 Gy de (2.3 Gy/f) c or m   | None             | CMFP+ovarian RT or CMF                               |
| 78Q Düsseldorf U         | Patey                 | Axillary dissection (88)               | 40 Gy (2 Gy/f) c               | 40 Gy (2 Gy/f) c                                | 40 Gy (2 Gy/f) c               | None             | LMF                                                  |
| 79F Coimbra              | NS                    | Axillary sampling (124)                | 36 Gy (3 Gy/f) o or m          | 39-45 Gy (3.3-3.8 Gy/f) m                       | 39 Gy (3.3 Gy/f) m             | None             | AC                                                   |
| 79G Metaxas Athens       | MRM, Patey MRM, or RM | Axillary dissection (71)               | 45-60 Gy (2 Gy/f) m            | 45-60 Gy (2 Gy/f) m                             | 45-60 Gy (2 Gy/f) m            | None             | CAMF & tam<br>Premen: ovarian RT                     |
| 80S Helsinki             | RM                    | Axillary dissection (99)               | 45 Gy (3 Gy/f) c               | 45 Gy (3 Gy/f) c, SC; 45 Gy (3 Gy/f) c, AF      | 45 Gy (3 Gy/f) c               | None             | CAFt                                                 |
| 80W NSABC Israel         | NS                    | Unknown (112)                          | 46-50 Gy (2 Gy/f) c or m       | 46-50 Gy (2 Gy/f) c or m                        | 40 Gy (2 Gy/f) c or m          | None             | CMF                                                  |
| 82B Danish BCG 82b pre   | SM                    | Axillary dissection (418)              | 36-50 Gy (1.8-2.2 Gy/f) o or e | 36-50 Gy (1.8-2.2 Gy/f) o or m                  | 36-50 Gy (1.8-2.2 Gy/f) o or e | None             | CMF                                                  |
| 82C Danish BCG 82c post  | SM                    | Axillary dissection (344)              | 36-50 Gy (1.8-2.2 Gy/f) o or e | 36-50 Gy (1.8-2.2 Gy/f) o or m                  | 36-50 Gy (1.8-2.2 Gy/f) o or e | None             | tam                                                  |
| 82Q ECOG EST3181         | MRM or RM             | Axillary dissection (332)              | 46 Gy (2 Gy/f) c or m          | 46-50 Gy (2 Gy/f) c or m                        | 46 Gy (2 Gy/f) c, m or e       | None             | CAF&H&tam                                            |
| 84A GBSG 03 Germany      | Patey                 | Axillary sampling (199)                | 50 Gy (2 Gy/f) c or m          | 50 Gy (2 Gy/f) c or m                           | 44 Gy(1.8 Gy/f) c or m         | None             | CMF                                                  |
| 85F Nottingham           | SM                    | Axillary sampling (77)                 | 45 Gy (3 Gy/f) m               | 45 Gy (3 Gy/f) m                                | None                           | None             | Premen; CMF<br>Postmen;tam                           |
| 86C CRC, UK              | NS                    | Unknown (71)                           | Various                        | Various                                         | Various                        | Various          | None                                                 |

\* Based on the description of axillary surgery in the trial protocol or publications or on information on individual women. Women were classified as having axillary dissection if they were in a trial where the protocol required removal of axillary lymph nodes in at least levels I & II or, if individual information was available (MD Ander. 7730B, Danish BCG 82b pre, Danish BCG 82c post), resection of ≥10 nodes. In other trials, women were classified as having axillary dissection if the trial publication indicated that the median number of nodes removed was ≥ 10. Women with less extensive axillary surgery were classified as having axillary sampling. A=doxorubicin (adriamycin), AC=doxorubicin and cyclophosphamide, AF=axillary fossa, b= additional posterior boost to axilla, bCG=bacillus Calmette-Guérin, C=cyclophosphamide, c=cobalt-60, de=dose at depth (of nodes), F=fluorouracil, Ft=Ftorafur, f=fraction, Gy=Gray (intended dose), H=halotestin, L=chlorambucil, m=megavoltage, M=methotrexate, Mel=melphalan, MRM=modified radical mastectomy, NS=surgery not specified in detail (Patey mastectomy, or modified radical mastectomy), o=orthovoltage, P=prednisone, Patey= Patey mastectomy, RM=radical mastectomy (Halsted), RT=radiotherapy, SC=supraclavicular, SM=simple (total) mastectomy; tam=tamoxifen, u=unknown.

## References for Webtable 1

| Year code and study name | Reference                                                                                                                                                                                                                                                                                                   |
|--------------------------|-------------------------------------------------------------------------------------------------------------------------------------------------------------------------------------------------------------------------------------------------------------------------------------------------------------|
| 64B Oslo X-ray           | Host H, Brennhovd IO, Loeb M. Postoperative radiotherapy in breast cancer-long-term results from the Oslo study. <i>Int J Radiat Oncol Biol Phys</i> 1986; <b>12</b> : 727–32.                                                                                                                              |
| 71B Stockholm A          | Gyenes G, Rutqvist LE, Liedberg A, Fornander T. Long-term cardiac morbidity and mortality in a randomized trial of pre- and postoperative radiation therapy versus surgery alone in primary breast cancer. <i>Radiother Oncol</i> 1998; <b>48</b> : 185–90.                                                 |
| 73A Southampton UK       | Turnbull AR, Turner DT, Chant AD, Shepherd JM, Buchanan RB, Fraser JD. Treatment of early breast cancer. <i>Lancet</i> 1978; <b>2</b> : 7–9.                                                                                                                                                                |
| 74B Edinburgh I          | Stewart HJ, Jack WJL, Everington D, Forrest APM, Rodger A, McDonald CC, et al. South-east Scottish trial of local therapy in node negative breast cancer. <i>The Breast</i> 1994; <b>3</b> : 31–9.                                                                                                          |
| 74D DFCI Boston          | Shapiro CL, Hardenbergh PH, Gelman R, Blanks D, Hauptman P, Recht A, et al. Cardiac effects of adjuvant doxorubicin and radiation therapy in breast cancer patients. <i>J Clin Oncol</i> 1998; <b>16</b> : 3493–501.                                                                                        |
| 74Q Piedmont OA          | Muss HB, Cooper MR, Brockschmidt JK, Ferree C, Richards F, 2nd, White DR, et al. A randomized trial of chemotherapy (L-PAM vs CMF) and irradiation for node positive breast cancer. Eleven year follow-up of a Piedmont Oncology Association trial. <i>Breast Cancer Res Treat</i> 1991; <b>19</b> : 77–84. |
| 76A SECSG 1              | Velez-Garcia E, Carpenter JT, Jr., Moore M, Vogel CL, Marcial V, Ketcham A, et al. Postsurgical adjuvant chemotherapy with or without radiotherapy in women with breast cancer and positive axillary nodes: a South-Eastern Cancer Study Group (SEG) Trial. <i>Eur J Cancer</i> 1992; <b>28A</b> : 1833–7.  |
| 76C Glasgow              | McArdle CS, McMillan DC, Greenlaw N, Morrison DS. Adjuvant radiotherapy and chemotherapy in breast cancer: 30 year follow-up of survival. <i>BMC Cancer</i> 2010; <b>10</b> : 398.                                                                                                                          |
| 77J MD Ander. 7730B      | Katz A, Strom EA, Buchholz TA, Thames HD, Smith CD, Jhingran A, et al. Locoregional recurrence patterns after mastectomy and doxorubicin-based chemotherapy: implications for postoperative irradiation. <i>J Clin Oncol</i> 2000; <b>18</b> : 2817–27.                                                     |
| 78A S Swedish BCG        | Killander F, Anderson H, Ryden S, Moller T, Aspegren K, Ceberg J, et al. Radiotherapy and tamoxifen after mastectomy in postmenopausal women - 20 year follow-up of the South Sweden Breast Cancer Group randomised trial SSBCG II:I. <i>Eur J Cancer</i> 2007; <b>43</b> : 2100–8.                         |
| 78G BCCA Vancouver       | Ragaz J, Jackson SM, Le N, Plenderleith IH, Spinelli JJ, Basco VE, et al. Adjuvant Radiotherapy and Chemotherapy in Node-Positive Premenopausal Women with Breast Cancer <i>N Engl J Med</i> 1997; <b>337</b> :956-962                                                                                      |
| 78Q Düsseldorf U         | Faber P, Jesdinsky H. Adjuvant chemotherapy in breast cancer-a multicenter trial. <i>Cancer Treat Rev</i> 1979; <b>6</b> Suppl: 75–8.                                                                                                                                                                       |
| 79F Coimbra              | De Oliveira CF R, F, Gervasio H, Alves, R, Silva A, Pedro L. Adjuvant chemotherapy versus radiotherapy and chemotherapy in operable breast cancer. A randomized trial. Preliminary results. Instituto Portugues De Oncologia Coimbra, <i>Portugal</i> 1984.                                                 |
| 79G Metaxas Athens       | Papaioannou AN. Preoperative chemotherapy: advantages and clinical application in stage III breast cancer. <i>Recent Results Cancer Res</i> 1985; <b>98</b> : 65–90.                                                                                                                                        |
| 80S Helsinki             | Saarto T, Blomqvist C, Rissanen P, Auvinen A, Elomaa I. Haematological toxicity: a marker of adjuvant chemotherapy efficacy in stage II and III breast cancer. <i>Br J Cancer</i> 1997; <b>75</b> : 301–5.                                                                                                  |

|                         |                                                                                                                                                                                                                                                                                                                                                                                                                                                                                                                                                                                                                           |
|-------------------------|---------------------------------------------------------------------------------------------------------------------------------------------------------------------------------------------------------------------------------------------------------------------------------------------------------------------------------------------------------------------------------------------------------------------------------------------------------------------------------------------------------------------------------------------------------------------------------------------------------------------------|
| 80W NSABC Israel        | H Hayat GB, R Borovik, S Chaichick, P Rathm E Robinson, S Biran, HJ Brenner. Adjuvant chemotherapy and radiation therapy vs. chemotherapy alone for stage II breast cancer patients. <i>Ann Oncol</i> 1990; <b>21</b> (suppl, abstr).                                                                                                                                                                                                                                                                                                                                                                                     |
| 82B Danish BCG 82b pre  | Andersson M, Kamby C, Jensen MB, Mouridsen H, Ejlertsen B, Dombernowsky P, et al. Tamoxifen in high-risk premenopausal women with primary breast cancer receiving adjuvant chemotherapy. Report from the Danish Breast Cancer co-operative Group DBCG 82B Trial. <i>Eur J Cancer</i> 1999; <b>35</b> : 1659–66.<br><br>Kyndi M, Overgaard M, Nielsen HM, Sorensen FB, Knudsen H, Overgaard J. High local recurrence risk is not associated with large survival reduction after postmastectomy radiotherapy in high-risk breast cancer: a subgroup analysis of DBCG 82 b&c. <i>Radiother Oncol</i> 2009; <b>90</b> : 74–9. |
| 82C Danish BCG 82c post | Overgaard M, Jensen MB, Overgaard J, Hansen PS, Rose C, Andersson M, et al. Postoperative radiotherapy in high-risk postmenopausal breast-cancer patients given adjuvant tamoxifen: Danish Breast Cancer Cooperative Group DBCG 82c randomised trial. <i>Lancet</i> 1999; <b>353</b> : 1641–8.<br><br>Kyndi M, Overgaard M, Nielsen HM, Sorensen FB, Knudsen H, Overgaard J. High local recurrence risk is not associated with large survival reduction after postmastectomy radiotherapy in high-risk breast cancer: a subgroup analysis of DBCG 82 b&c. <i>Radiother Oncol</i> 2009; <b>90</b> : 74–9.                  |
| 82Q ECOG EST3181        | Olson JE, Neuberg D, Pandya KJ, Richter MP, Solin LJ, Gilchrist KW, et al. The role of radiotherapy in the management of operable locally advanced breast carcinoma: results of a randomized trial by the Eastern Cooperative Oncology Group. <i>Cancer</i> 1997; <b>79</b> : 1138–49.                                                                                                                                                                                                                                                                                                                                    |
| 84A GBSG 03 Germany     | Schmoor C, Olschewski M, Sauerbrei W, Schumacher M. Long-term follow-up of patients in four prospective studies of the German Breast Cancer Study Group (GBSG): A summary of key results. <i>Onkologie</i> 2002; <b>25</b> : 143–50.                                                                                                                                                                                                                                                                                                                                                                                      |
| 85F Nottingham          | Morgan DA, Berridge J, Blamey RW. Postoperative radiotherapy following mastectomy for high-risk breast cancer. A randomised trial. <i>Eur J Cancer</i> 2002; <b>38</b> : 1107–10.                                                                                                                                                                                                                                                                                                                                                                                                                                         |
| 86C CRC, UK             | Houghton J PI, Tobias J, Baum M, Odling-Smee W. Prophylactic radiotherapy following surgery for early breast cancer: is the benefit mainly in patients with involved margins? Results from a Cancer Research Campaign trial. <i>Proc Am Soc Clin Oncol</i> 2001; <b>20</b> : 31a.                                                                                                                                                                                                                                                                                                                                         |

**Webfigure 2. Effect of radiotherapy (RT) to the chest wall and regional lymph nodes versus not after mastectomy and axillary dissection (Mast+AD):** 10-year risk of locoregional recurrence and recurrence of any type and 20-year risk of breast cancer and all-cause mortality in 700 women with pathologically node-negative (pN0) disease. See webfigure 1 for methodological note and also webfigure 3. Note: 1 locoregional recurrence, 5 recurrences of any type and 5 breast cancer deaths were reported among the 9 pN0 women with tumours  $\geq 5$  cm who were allocated to receive radiotherapy. 0 locoregional recurrences, 3 recurrences of any type and 4 breast cancer deaths were reported among the 11 pN0 women with tumours  $\geq 5$  cm who were allocated to not to receive radiotherapy.

## 700 pN0 women with Mast+AD

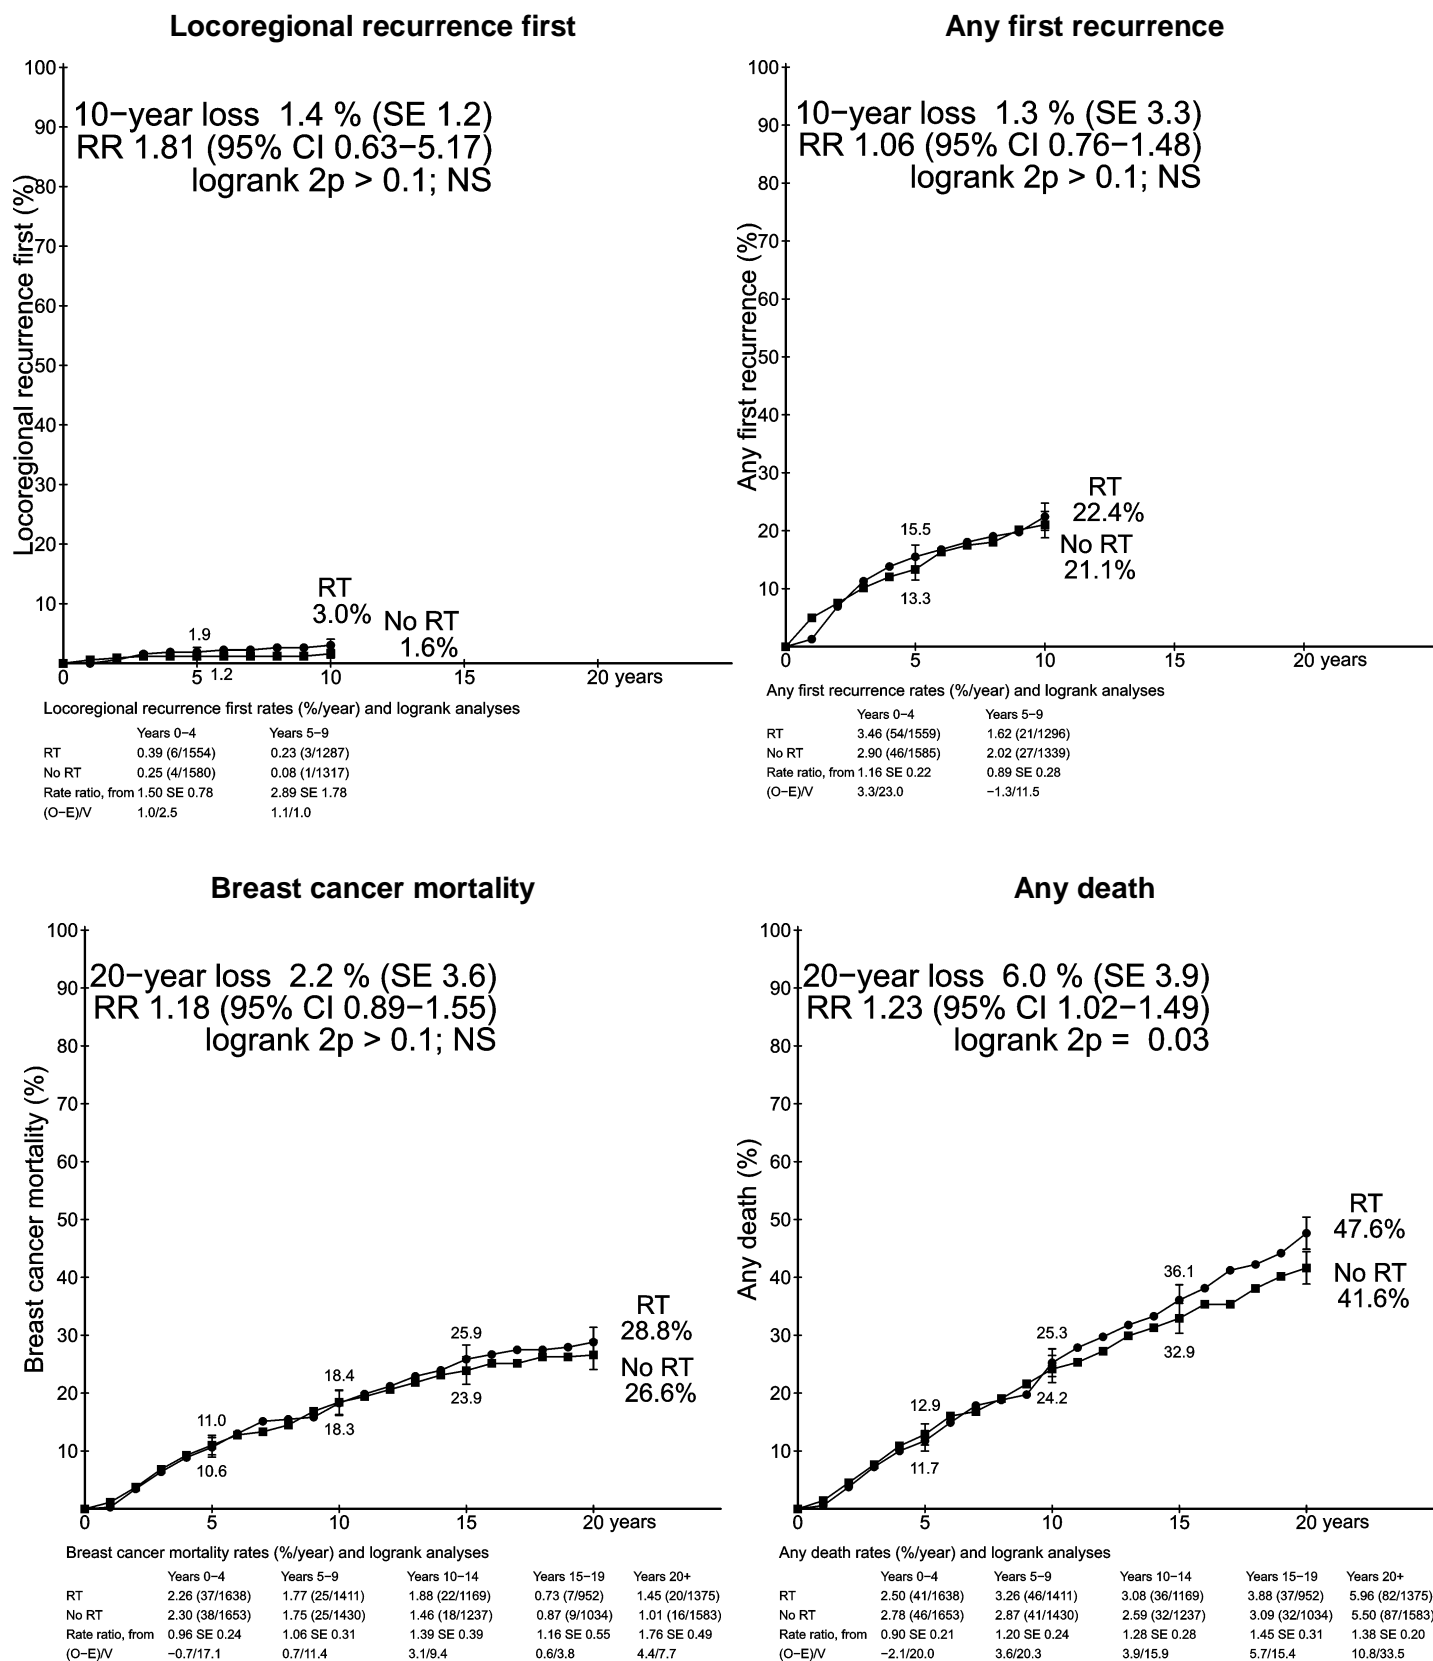

**Webfigure 3. Effect of radiotherapy (RT) to the chest wall and regional lymph nodes versus not after mastectomy and axillary dissection (Mast+AD):**  
 10-year risk of recurrence and type of first recurrence, by allocated treatment, in 700 women with pathologically node-negative (pN0) disease.  
 ( $r_L$  = number of women for whom first recurrence was locoregional,  $r_D$  = number women for whom distant recurrence was first.)

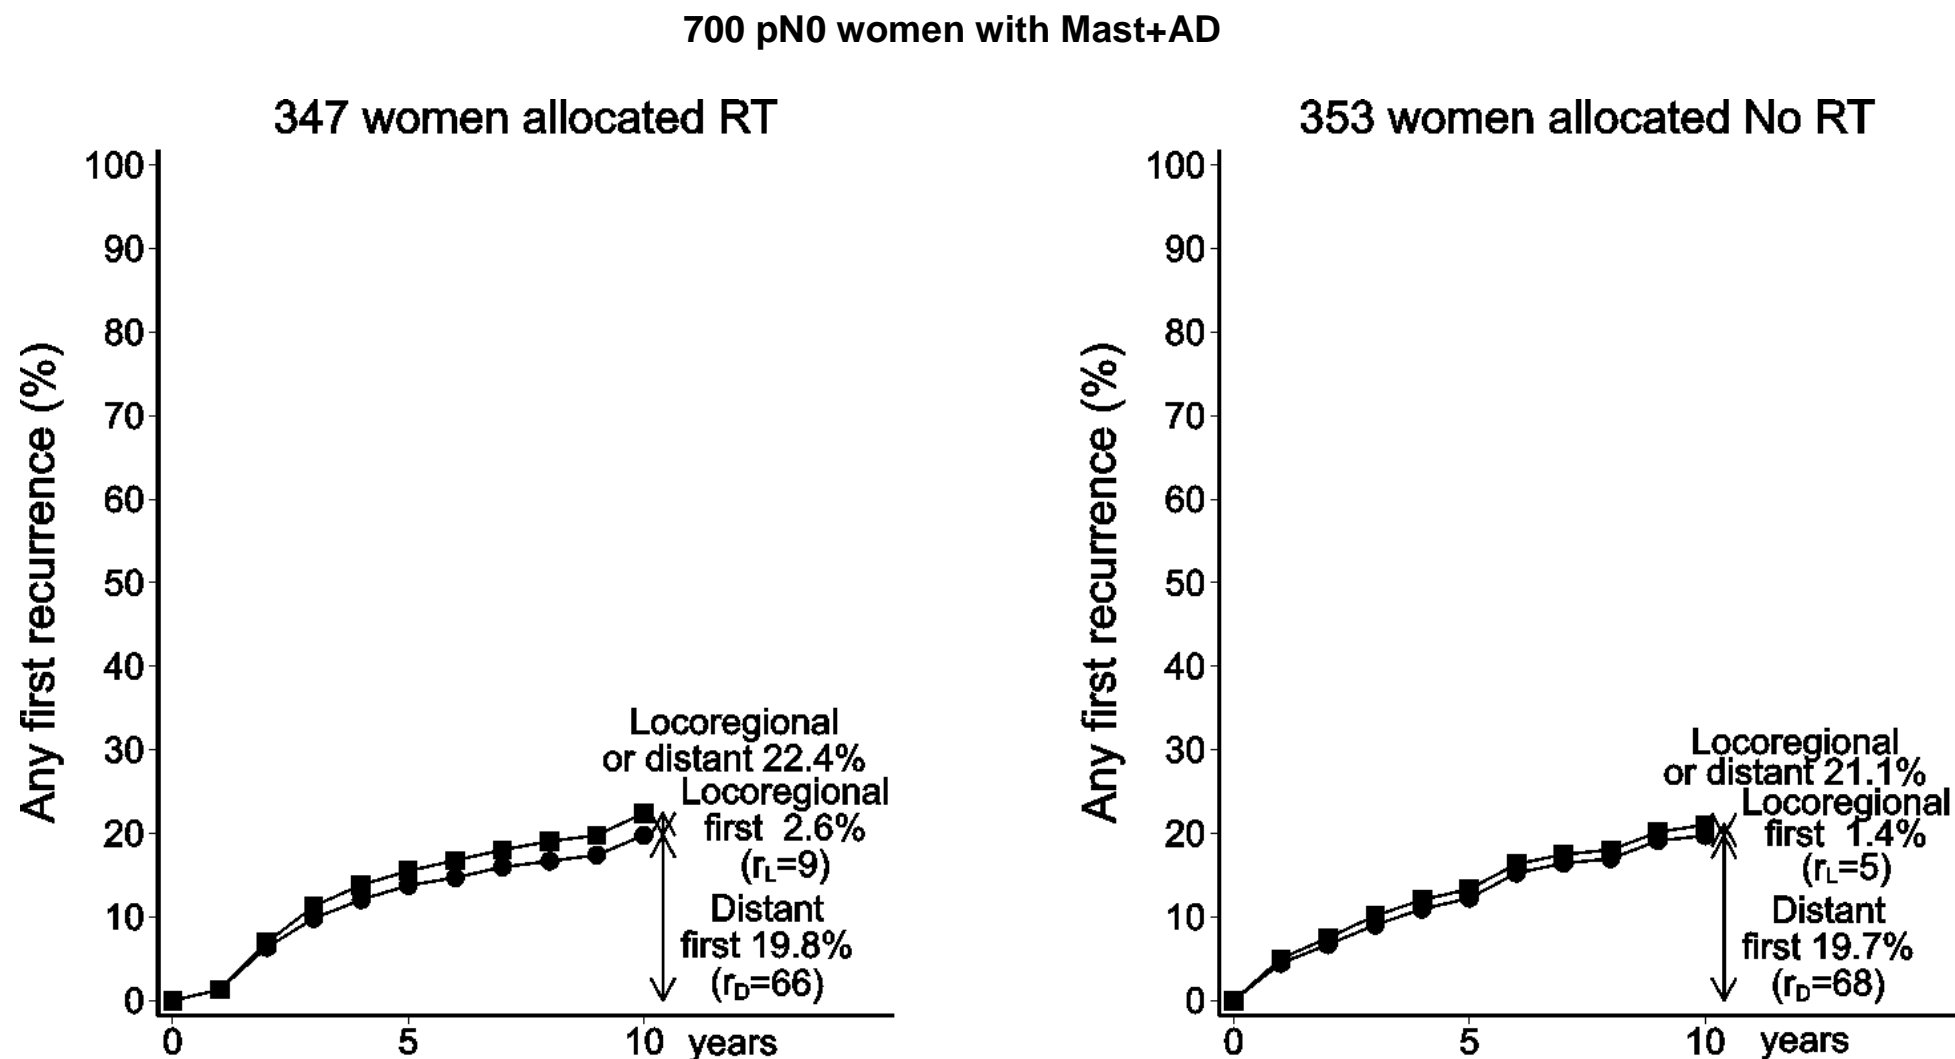

2p for difference between treatment arms in the proportion of all first recurrences that were locoregional: > 0.1; NS

**Webfigure 4. Effect of radiotherapy (RT) to the chest wall and regional lymph nodes versus not after mastectomy and axillary dissection (Mast+AD): 10-year risk of locoregional recurrence and recurrence of any type and 20-year risk of breast cancer and all-cause mortality in 3131 women with pathologically node-positive (pN+) disease. See webfigure 1 for methodological note and also webfigure 5.**

## 3131 pN+ women with Mast+AD

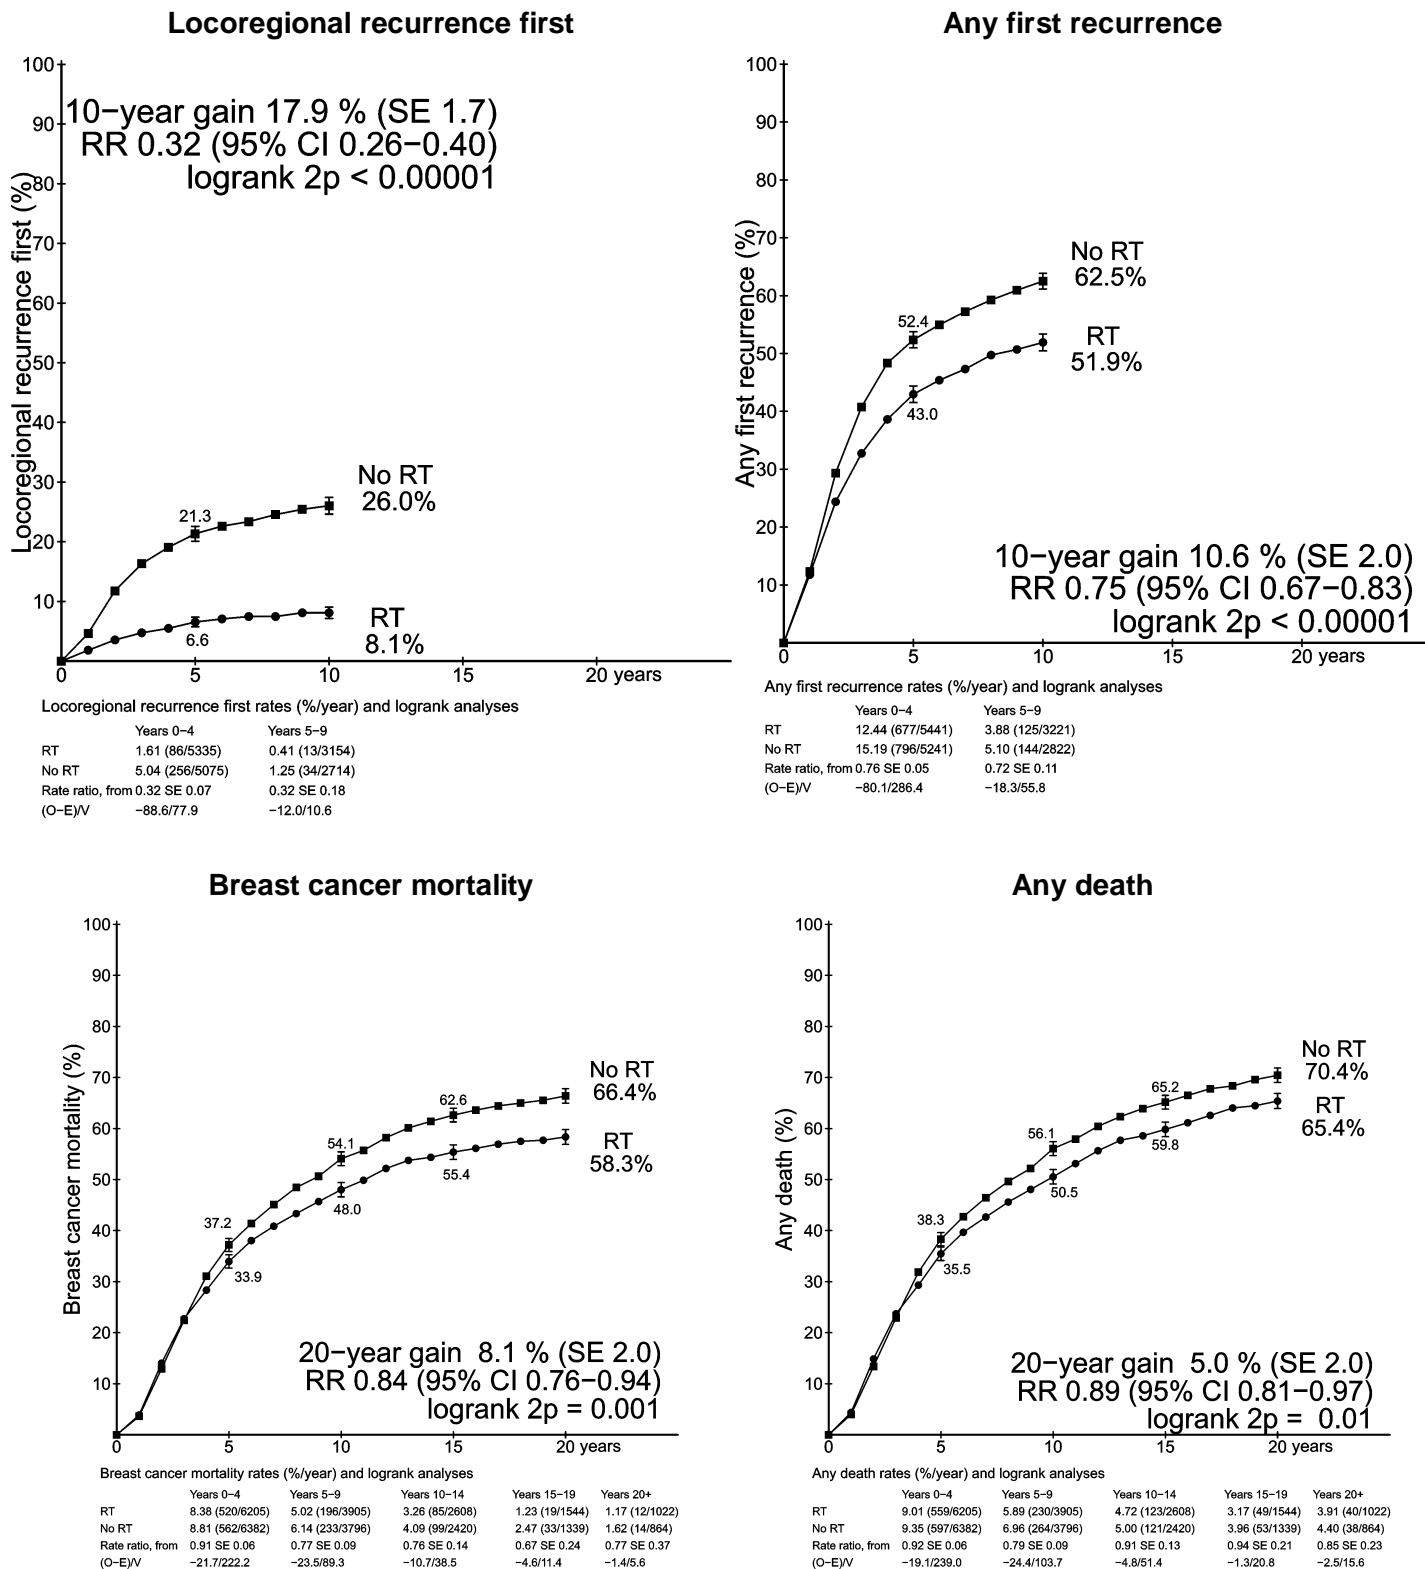

**Webfigure 5. Effect of radiotherapy (RT) to the chest wall and regional lymph nodes versus not after mastectomy and axillary dissection (Mast+AD): 10-year risk of recurrence and type of first recurrence, by allocated treatment, in 3131 women with pathologically node-positive (pN+) disease.**  
 ( $r_L$  = number of women for whom first recurrence was locoregional,  $r_D$  = number women for whom distant recurrence was first.)

3131 pN+ women with Mast+AD

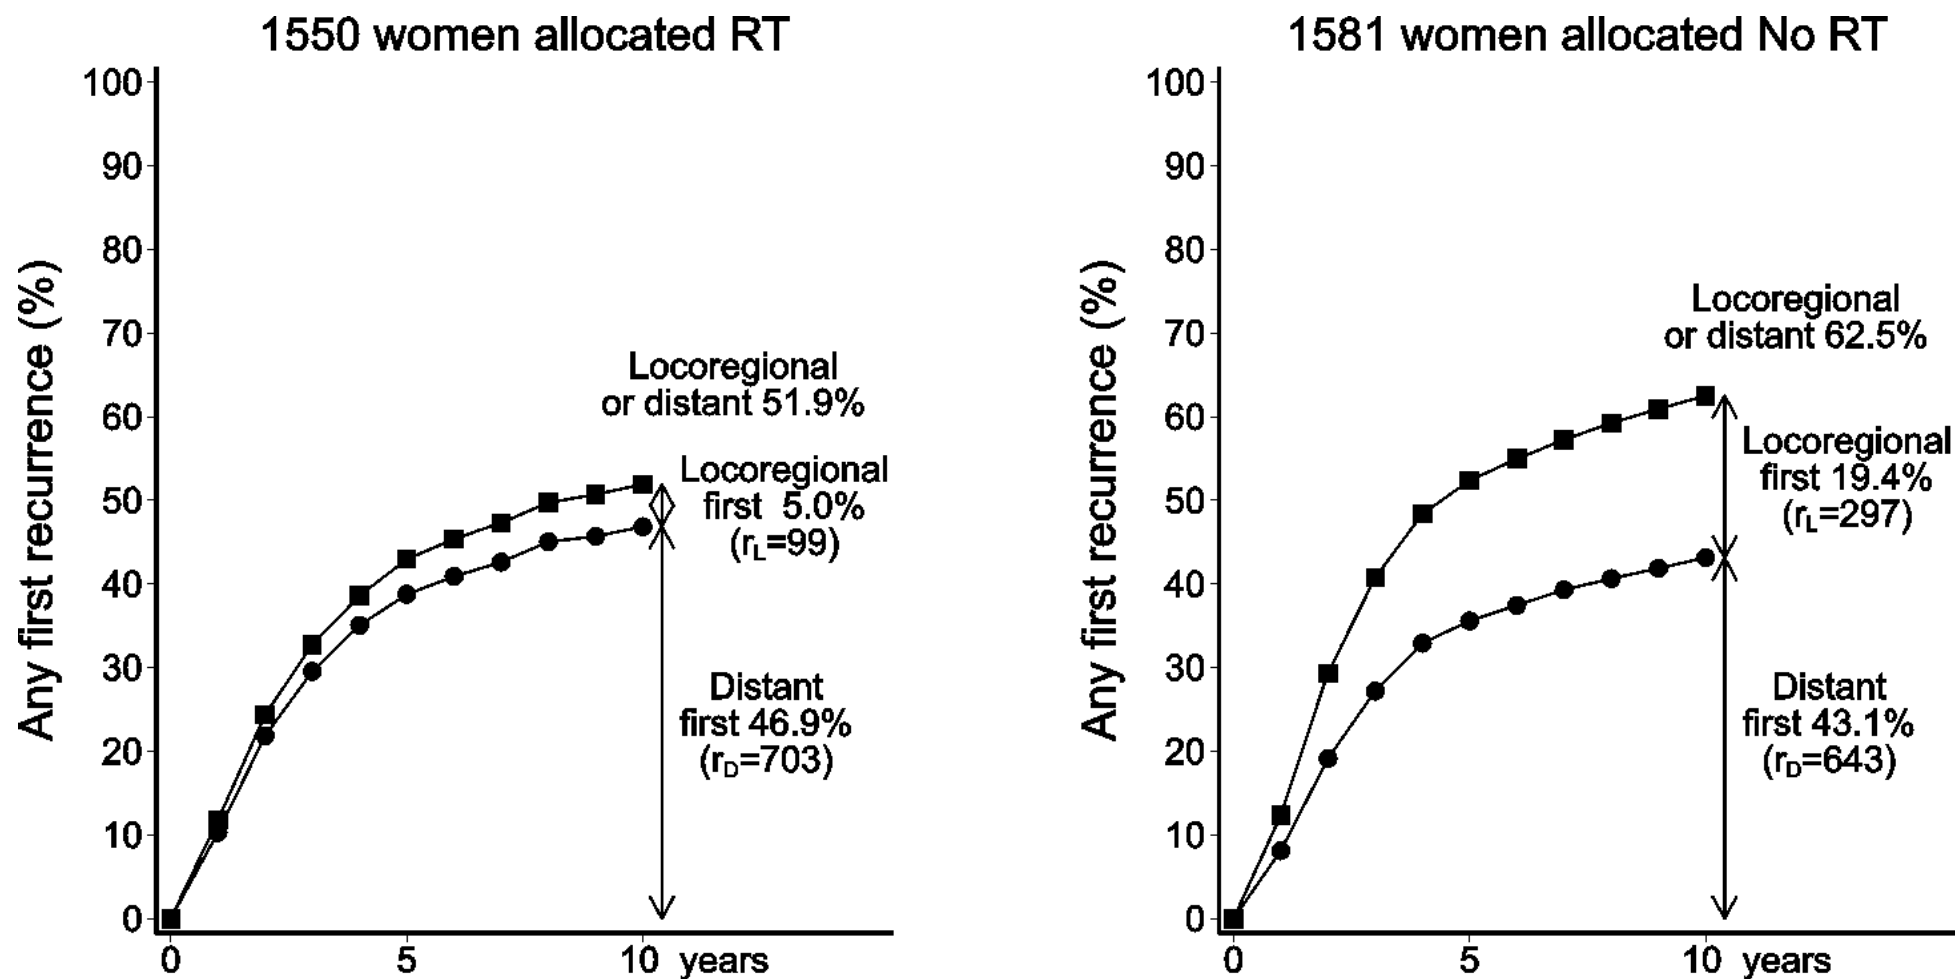

2p for difference between treatment arms in the proportion of all first recurrences that were locoregional:  $< 0.00001$

**Webfigure 6. Effect of radiotherapy (RT) to the chest wall and regional lymph nodes versus not after mastectomy and axillary dissection (Mast+AD):** Event rate ratios and 95% confidence intervals for locoregional recurrence and recurrence of any type during years 0-9 and for breast cancer mortality in 3131 women with pathologically node-positive (pN+) disease by prognostic and other factors. Categories with unknowns are excluded from the heterogeneity and trend tests.

## 3131 pN+ women with Mast+AD

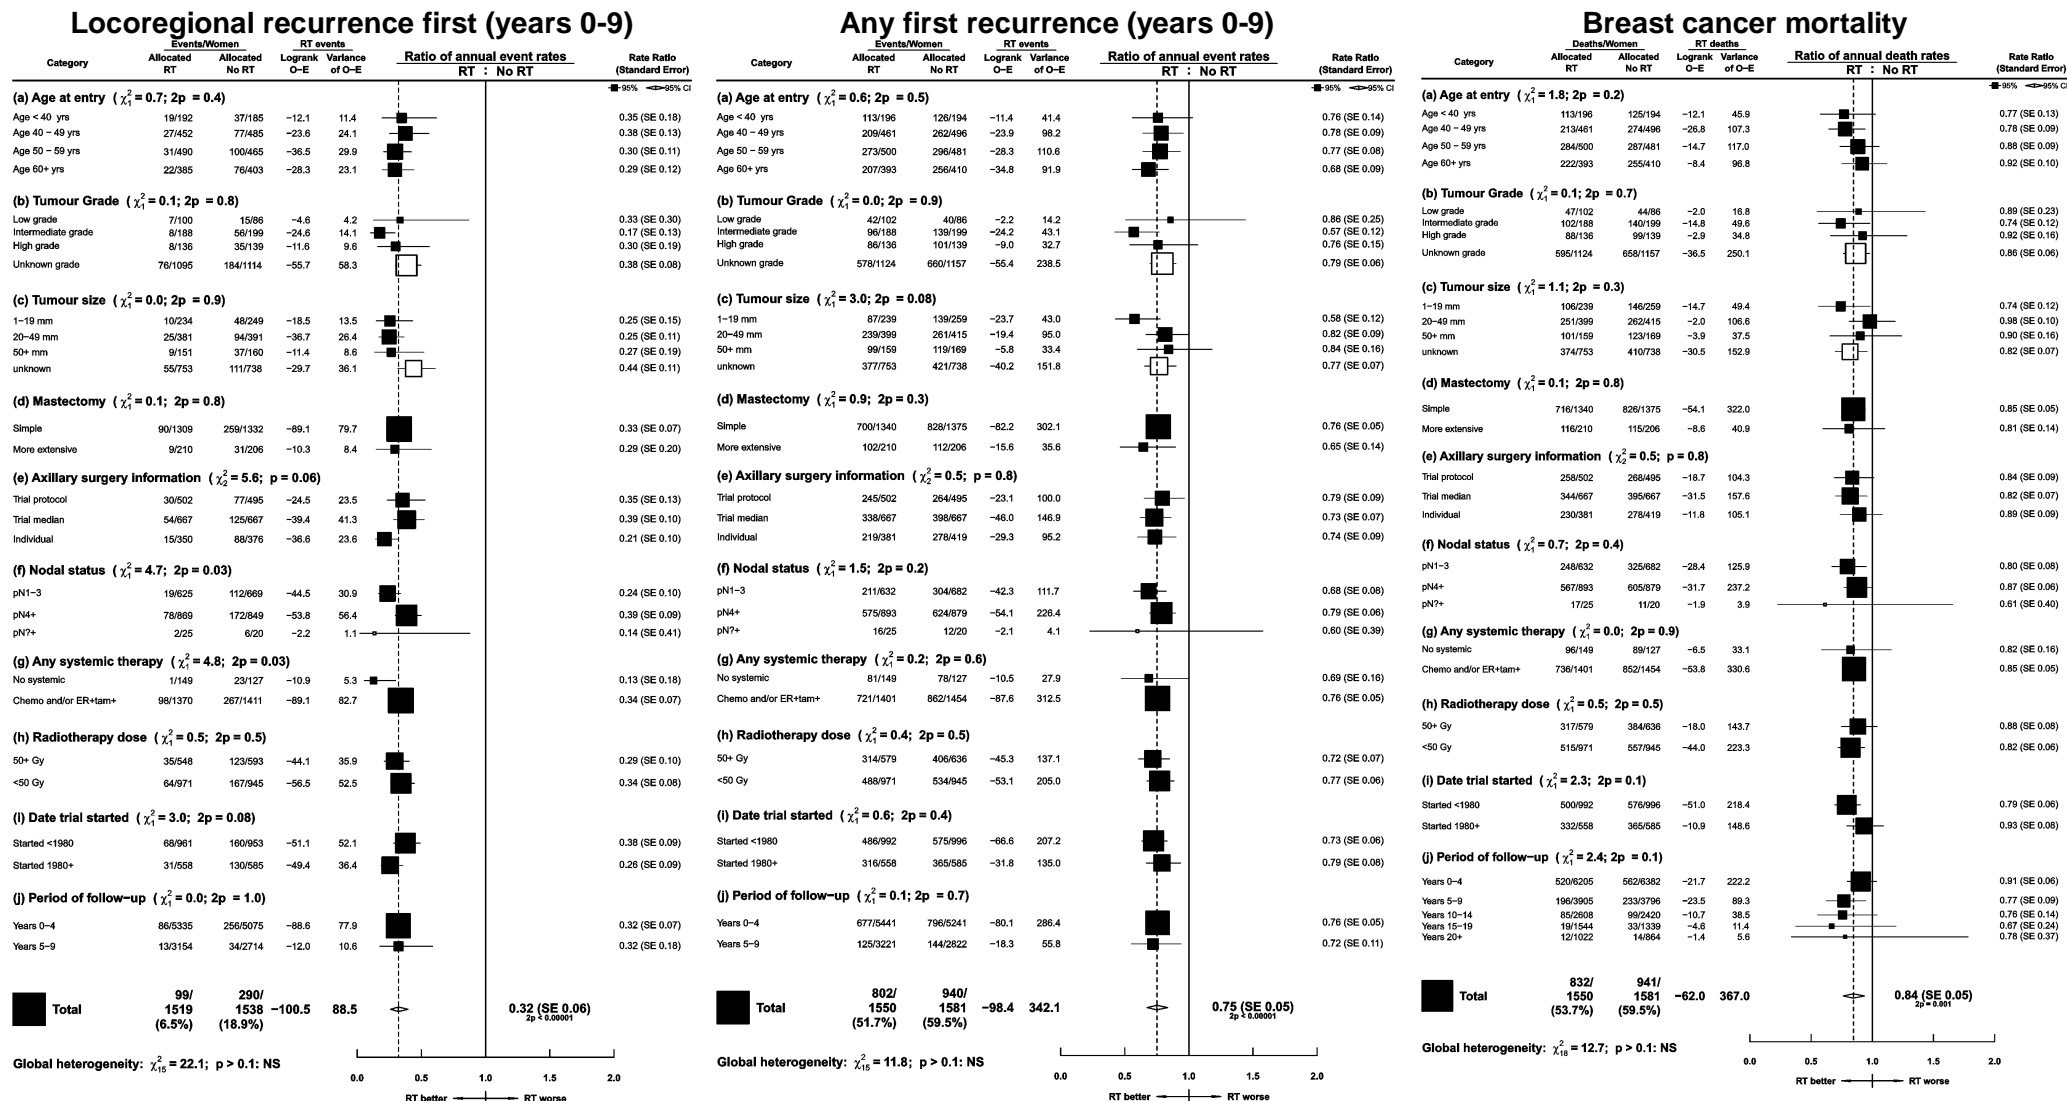

Note: In (g), 181 women who were ER positive with tamoxifen also had chemotherapy. In (h), trials that used orthovoltage irradiation are included in the <50 Gy category.

**Webfigure 7. Effect of radiotherapy (RT) to the chest wall and regional lymph nodes versus not after mastectomy and axillary dissection (Mast+AD): 10-year risk of locoregional recurrence and recurrence of any type and 20-year risk of breast cancer and all-cause mortality in 1314 women with 1-3 pathologically positive nodes (pN1-3). See webfigure 1 for methodological note and also webfigure 8.**

### 1314 pN1-3 women with Mast+AD

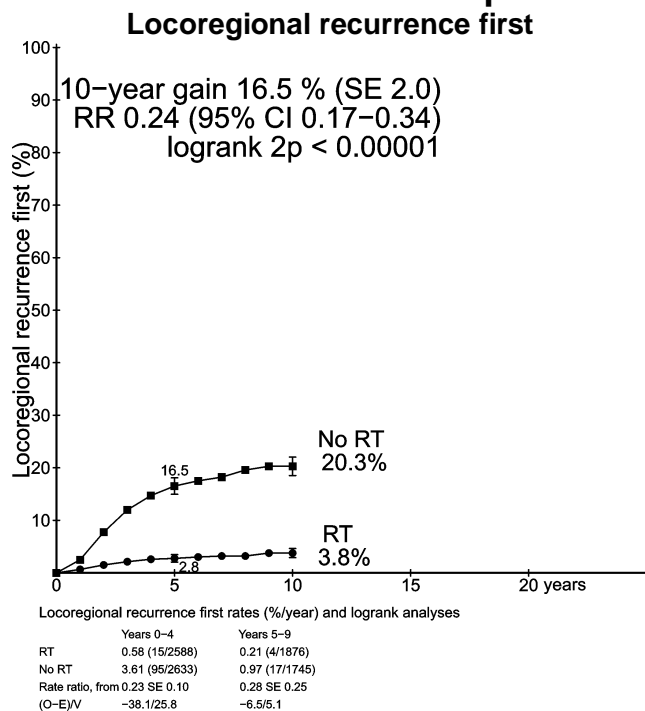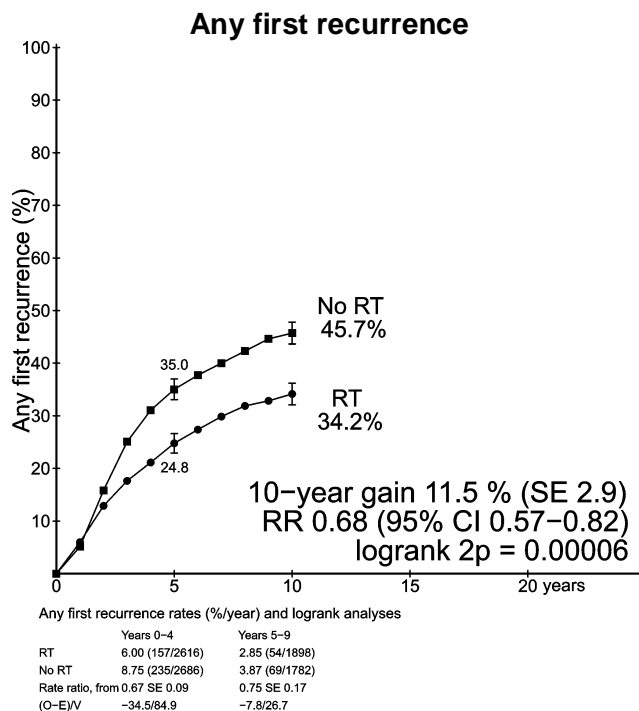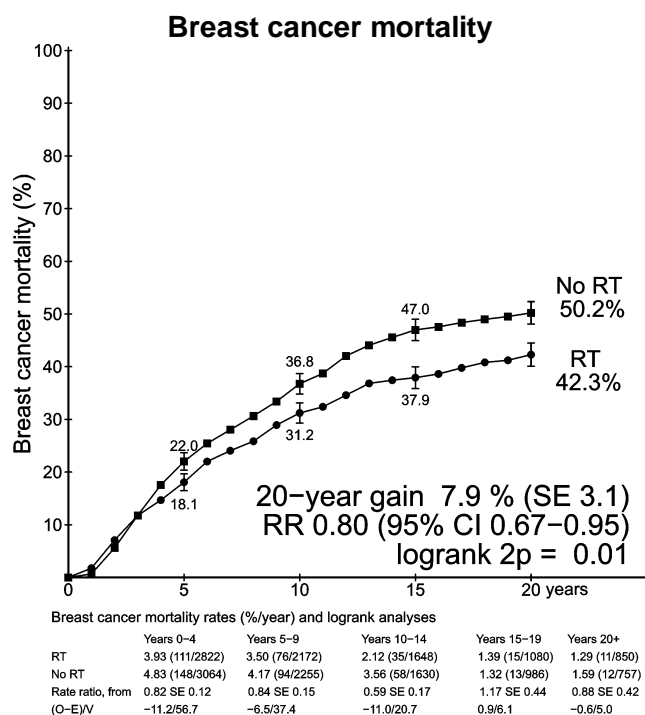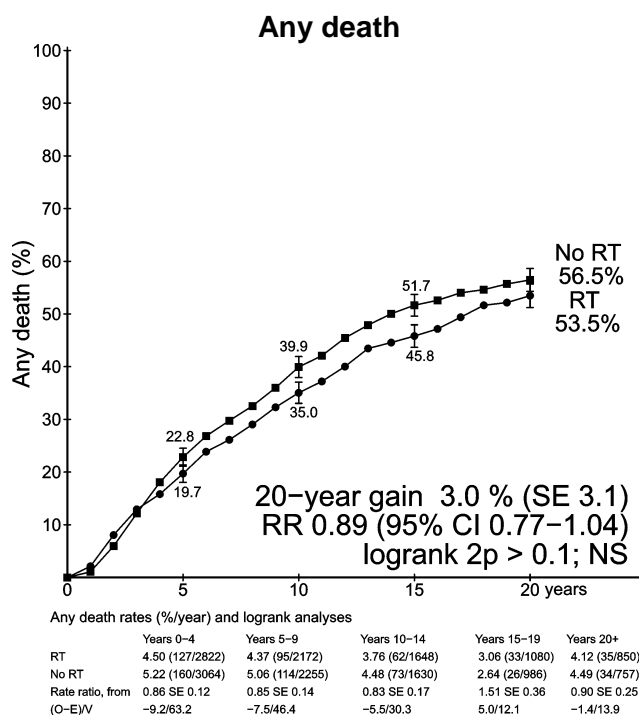

**Webfigure 8. Effect of radiotherapy (RT) to the chest wall and regional lymph nodes versus not after mastectomy and axillary dissection (Mast+AD): 10-year risk of recurrence and type of first recurrence, by allocated treatment, in 1314 women with 1-3 pathologically positive nodes (pN1-3).**  
 ( $r_L$  = number of women for whom first recurrence was locoregional,  $r_D$  = number women for whom distant recurrence was first.)

**1314 pN1-3 women with Mast+AD**

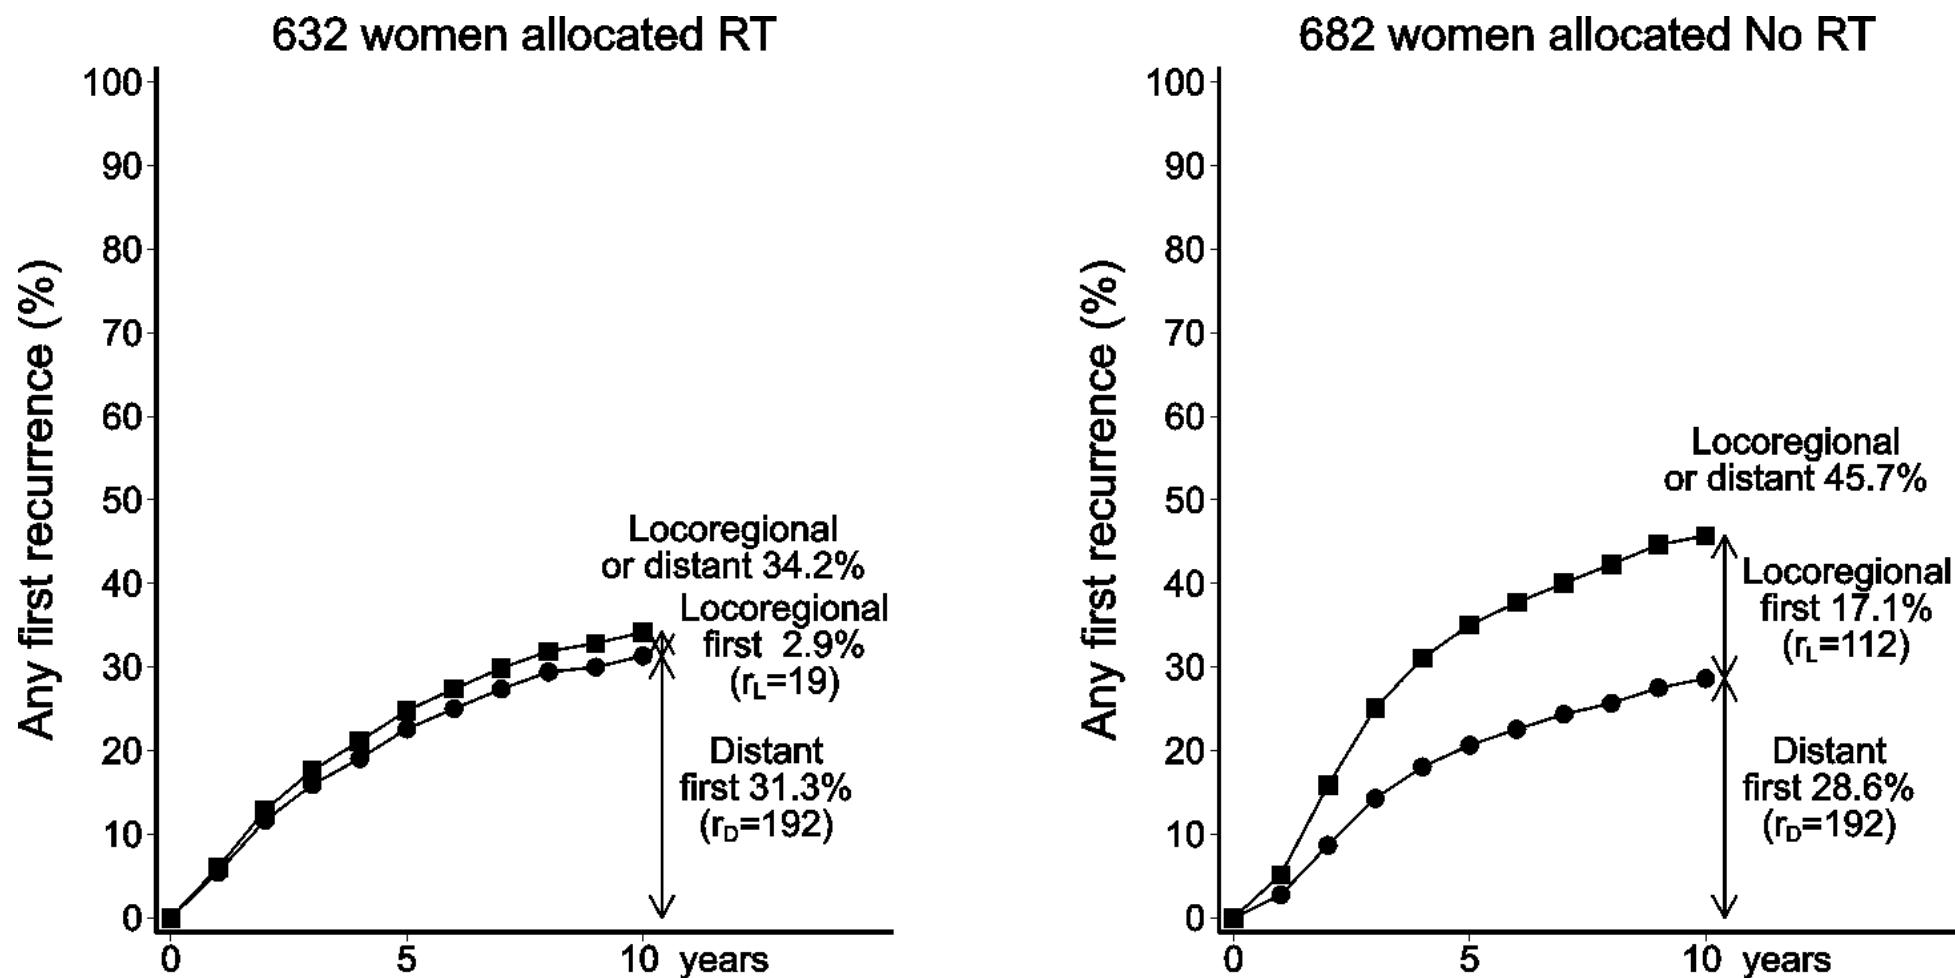

2p for difference between treatment arms in the proportion of all first recurrences that were locoregional: < 0.00001

**Webfigure 9. Effect of radiotherapy (RT) to the chest wall and regional lymph nodes versus not after mastectomy and axillary dissection (Mast+AD):** Event rate ratios and 95% confidence intervals for locoregional recurrence and recurrence of any type during years 0-9 and for breast cancer mortality in 1314 women with 1-3 pathologically positive nodes (pN1-3) by prognostic and other factors. Categories with unknowns are excluded from the heterogeneity and trend tests.

## 1314 pN1-3 women with Mast+AD

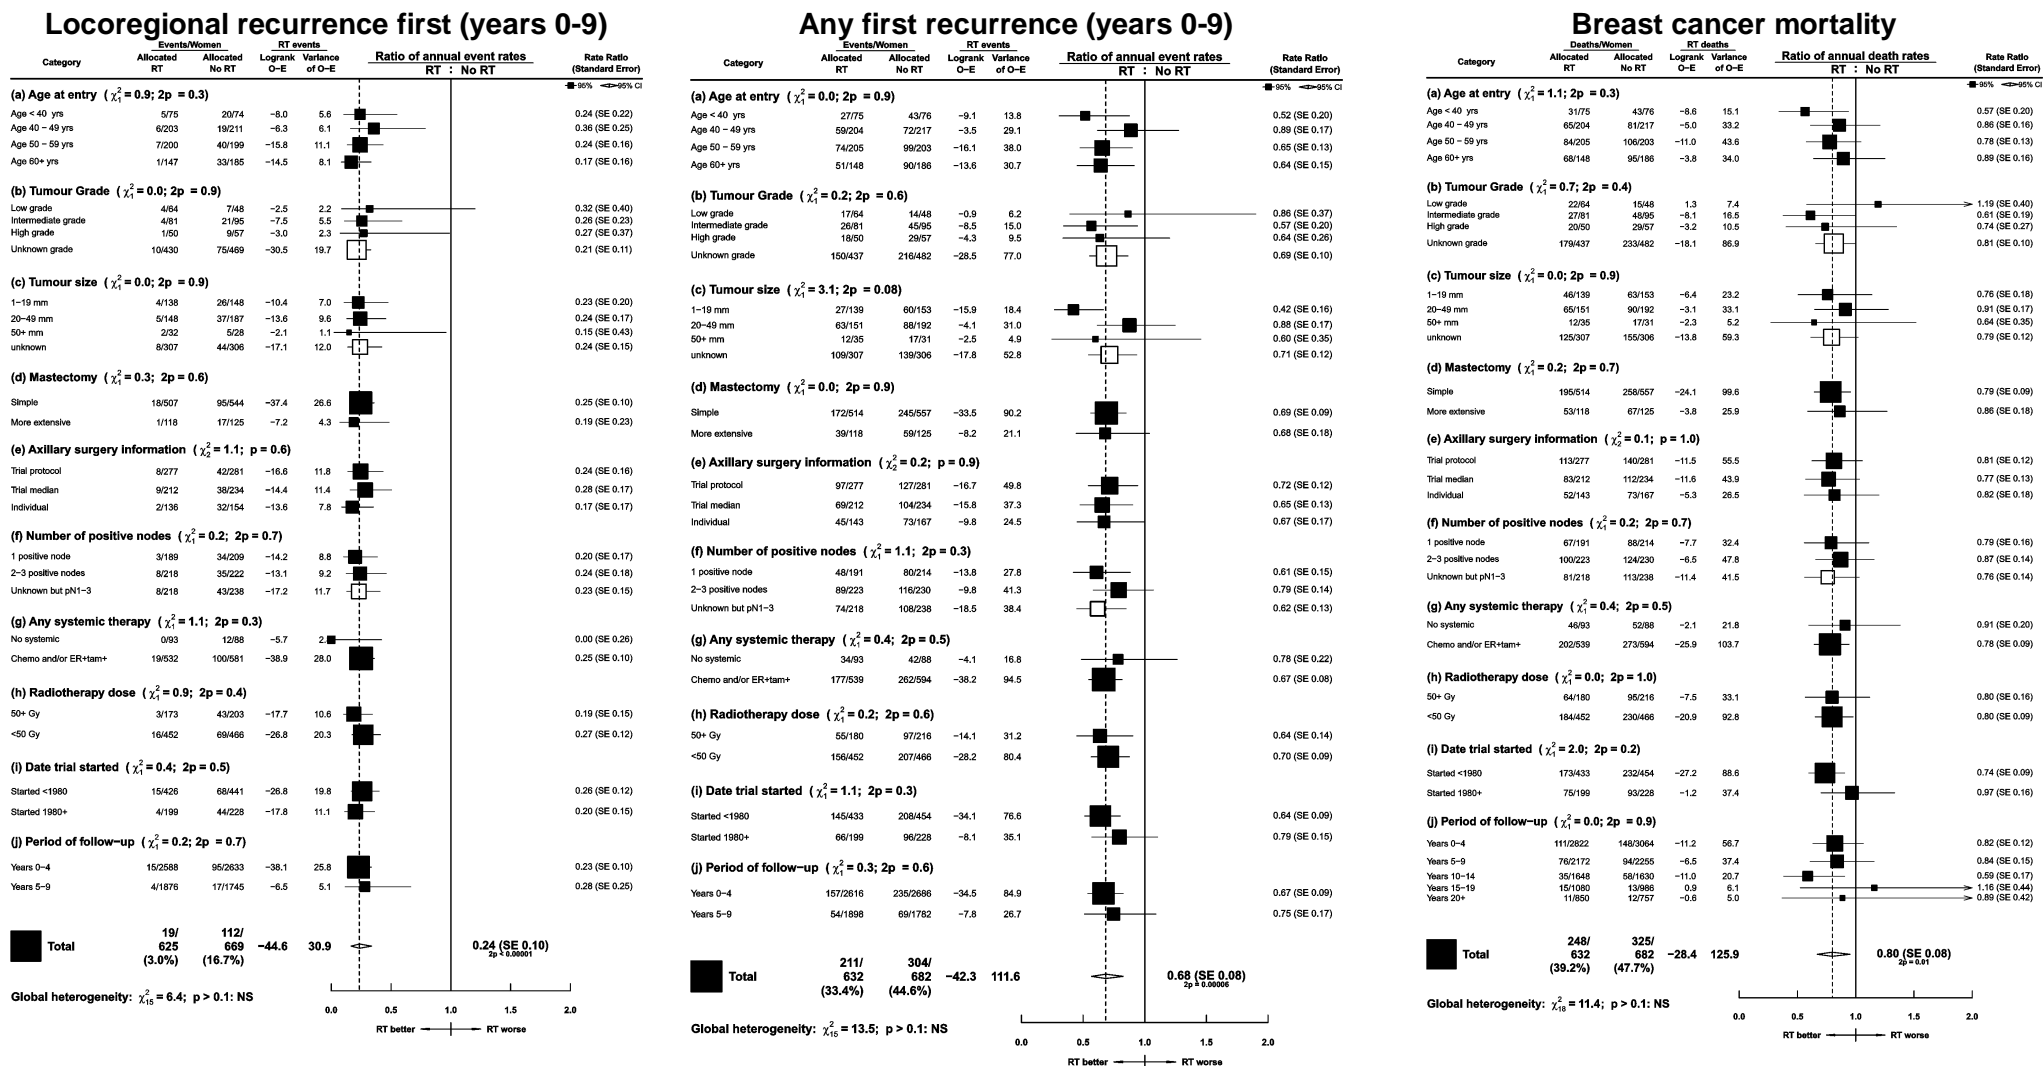

In (h), trials that used orthovoltage irradiation are included in the <50 Gy category.

**Webfigure 10. Effect of radiotherapy (RT) to the chest wall and regional lymph nodes versus not after mastectomy and axillary dissection (Mast+AD): 10-year risk of locoregional recurrence and recurrence of any type and 20-year risk of breast cancer and all-cause mortality in 1133 women with 1-3 pathologically positive nodes (pN1-3) in trials where systemic therapy was given to both randomised treatment groups. See webfigure 1 for methodological note and also webfigure 11.**

## 1133 pN1-3 women with Mast+AD and systemic therapy

### Locoregional recurrence first

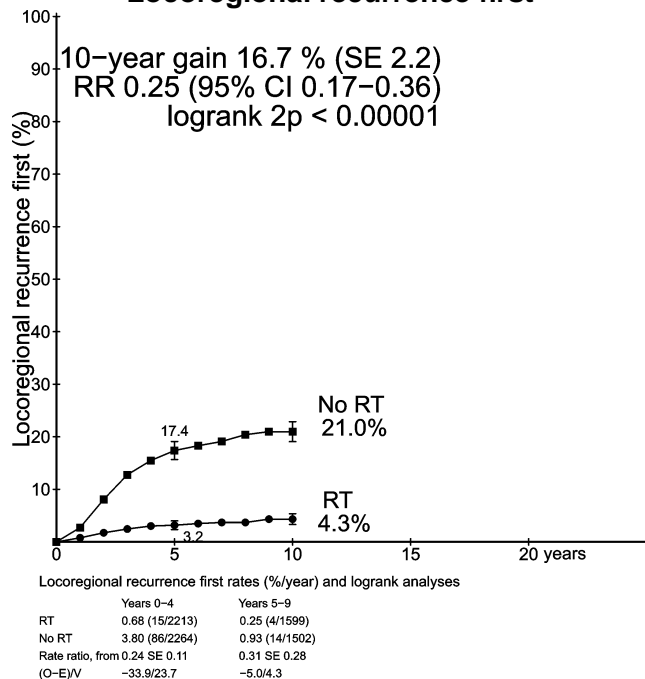

### Any first recurrence

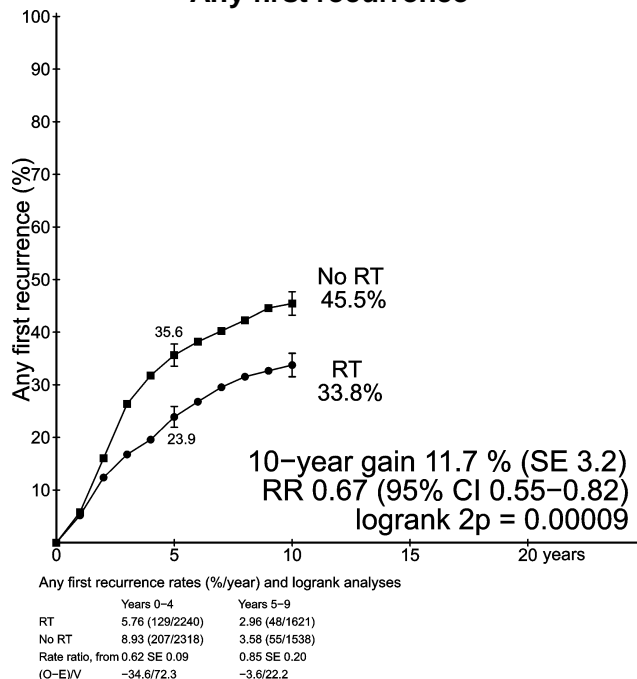

### Breast cancer mortality

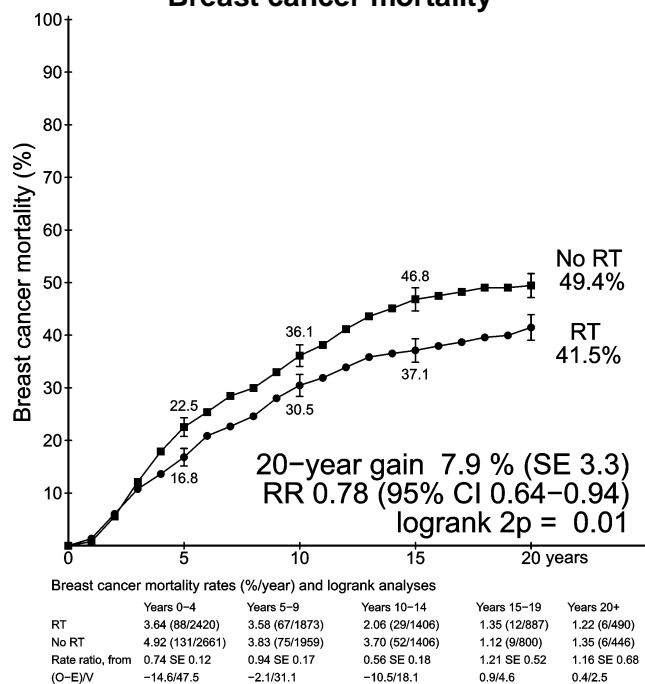

### Any death

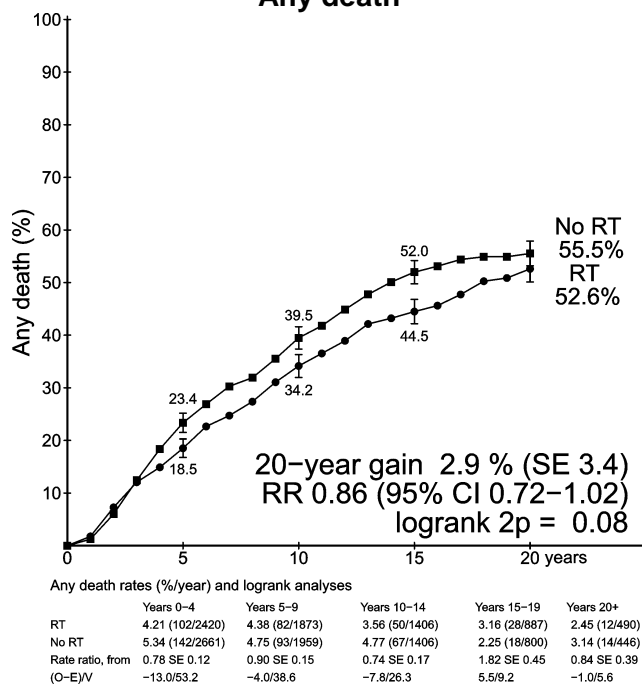

**Webfigure 11. Effect of radiotherapy (RT) to the chest wall and regional lymph nodes versus not after mastectomy and axillary dissection (Mast+AD):** 10-year risk of recurrence and type of first recurrence, by allocated treatment, in 1133 women with 1-3 pathologically positive nodes (pN1-3) in trials where systemic therapy was given to both randomised treatment groups. ( $r_L$  = number of women for whom first recurrence was locoregional,  $r_D$  = number women for whom distant recurrence was first.)

**1133 pN1-3 women with Mast+AD and systemic therapy**

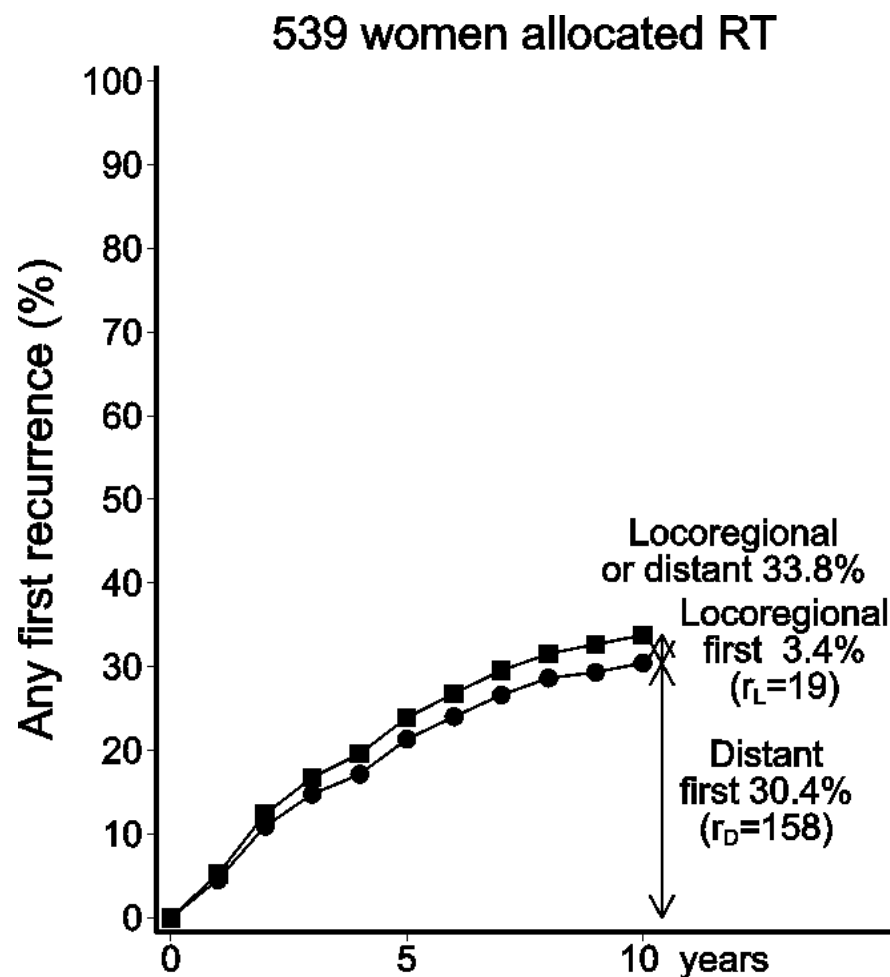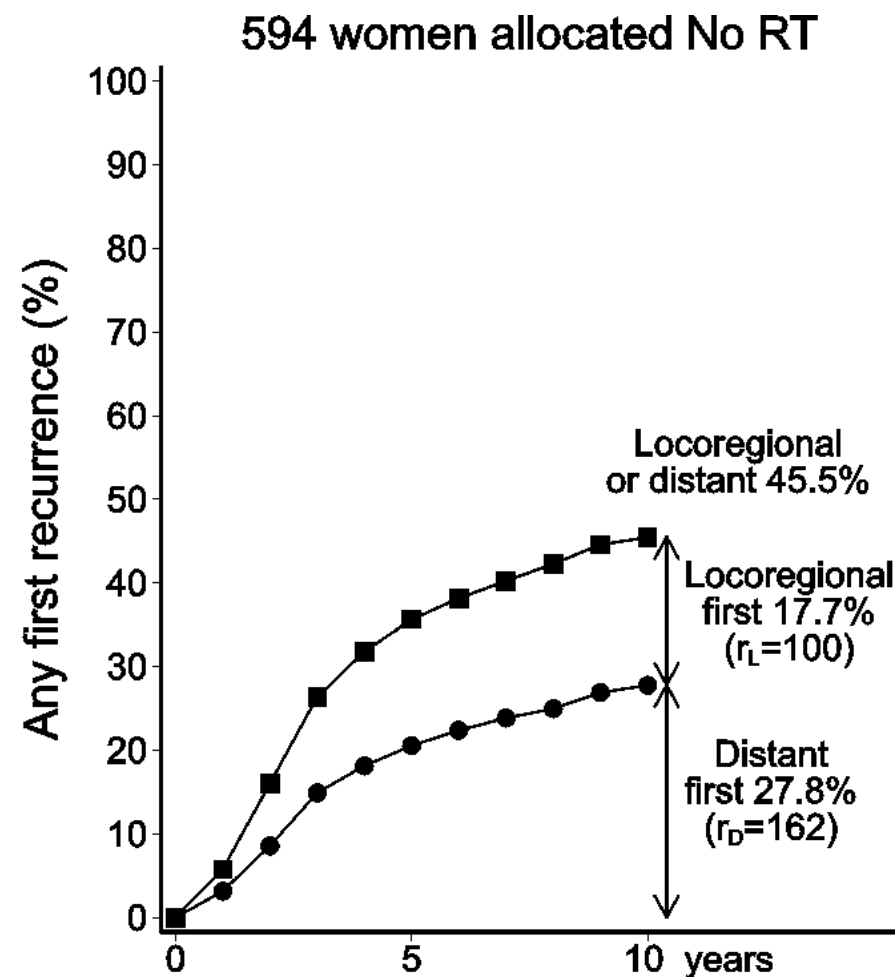

2p for difference between treatment arms in the proportion of all first recurrences that were locoregional: < 0.00001

**Webfigure 12. Effect of radiotherapy (RT) to the chest wall and regional lymph nodes versus not after mastectomy and axillary dissection (Mast+AD): 10-year risk of locoregional recurrence and recurrence of any type and 15-year risk of breast cancer mortality in 1133 women with 1-3 pathologically positive nodes (pN1-3) in trials where systemic therapy was given to both randomised treatment groups subdivided according to number of positive nodes. See webfigure 1 for methodological note and also webfigures 13-15.**

### Locoregional recurrence first

### Any first recurrence

### Breast cancer mortality

#### 318 women with Mast+AD, systemic therapy and 1 positive node

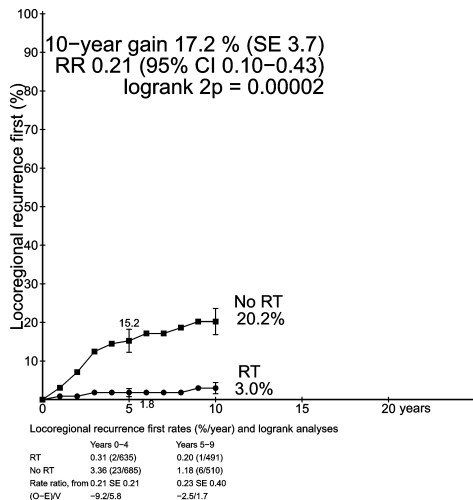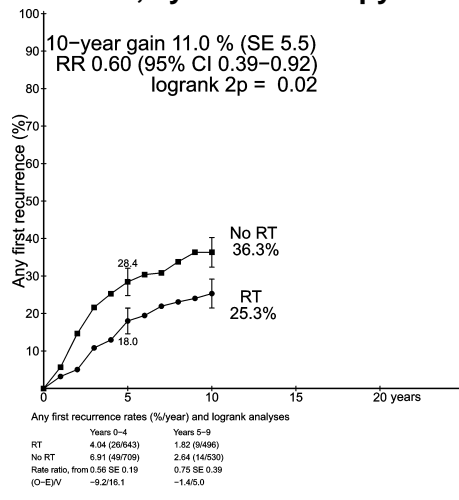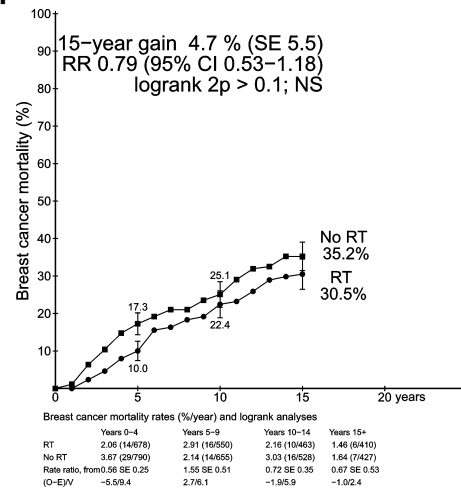

#### 365 women with Mast+AD, systemic therapy and 2-3 positive nodes

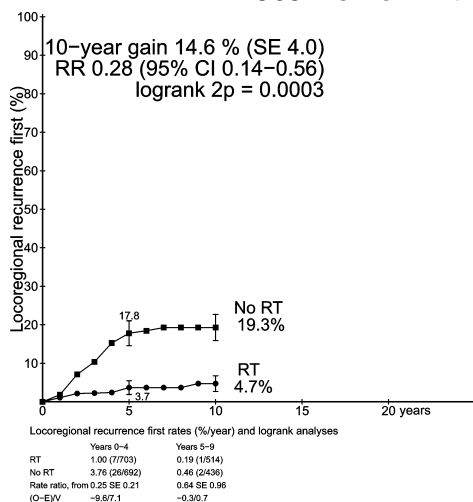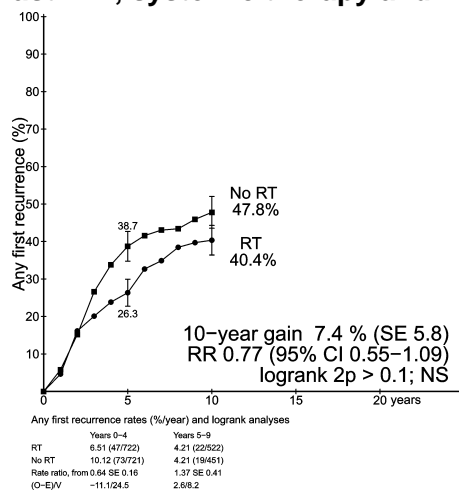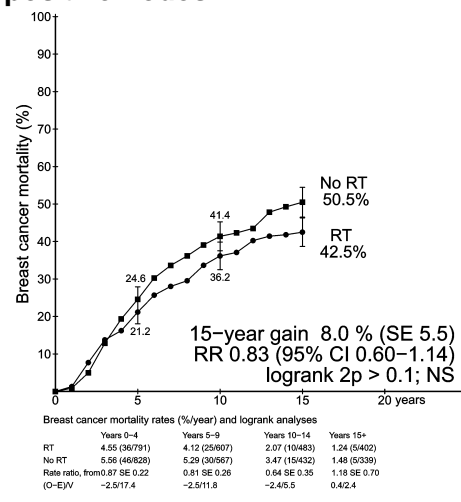

#### 450 pN1-3 women with exact number of positive nodes unknown, Mast+AD and systemic therapy

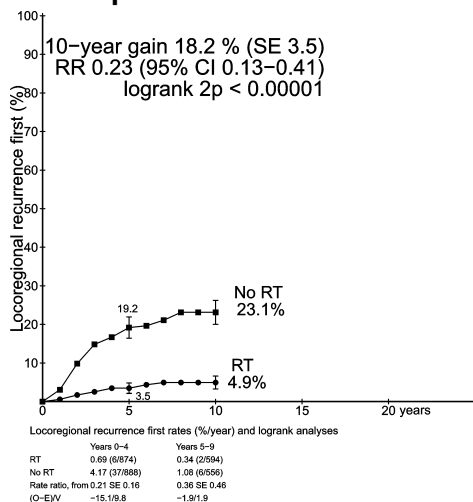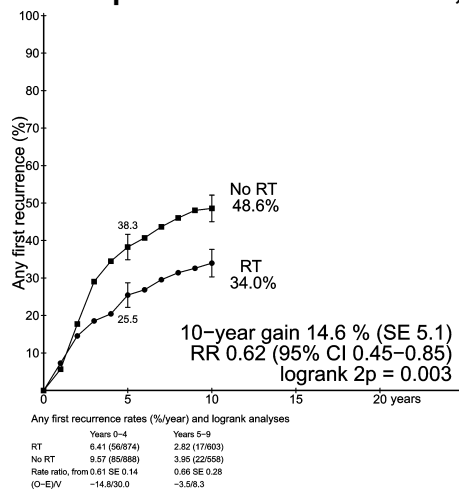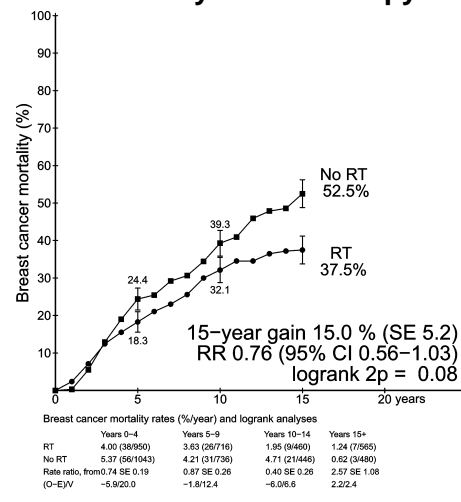

**Webfigure 13. Effect of radiotherapy (RT) to the chest wall and regional lymph nodes versus not after mastectomy and axillary dissection (Mast+AD):** 10-year risk of recurrence and type of first recurrence, by allocated treatment, in 318 women with 1 pathologically positive node (pN1) and where systemic therapy was given to both randomised treatment groups. ( $r_L$  = number of women for whom first recurrence was locoregional,  $r_D$  = number women for whom distant recurrence was first.)

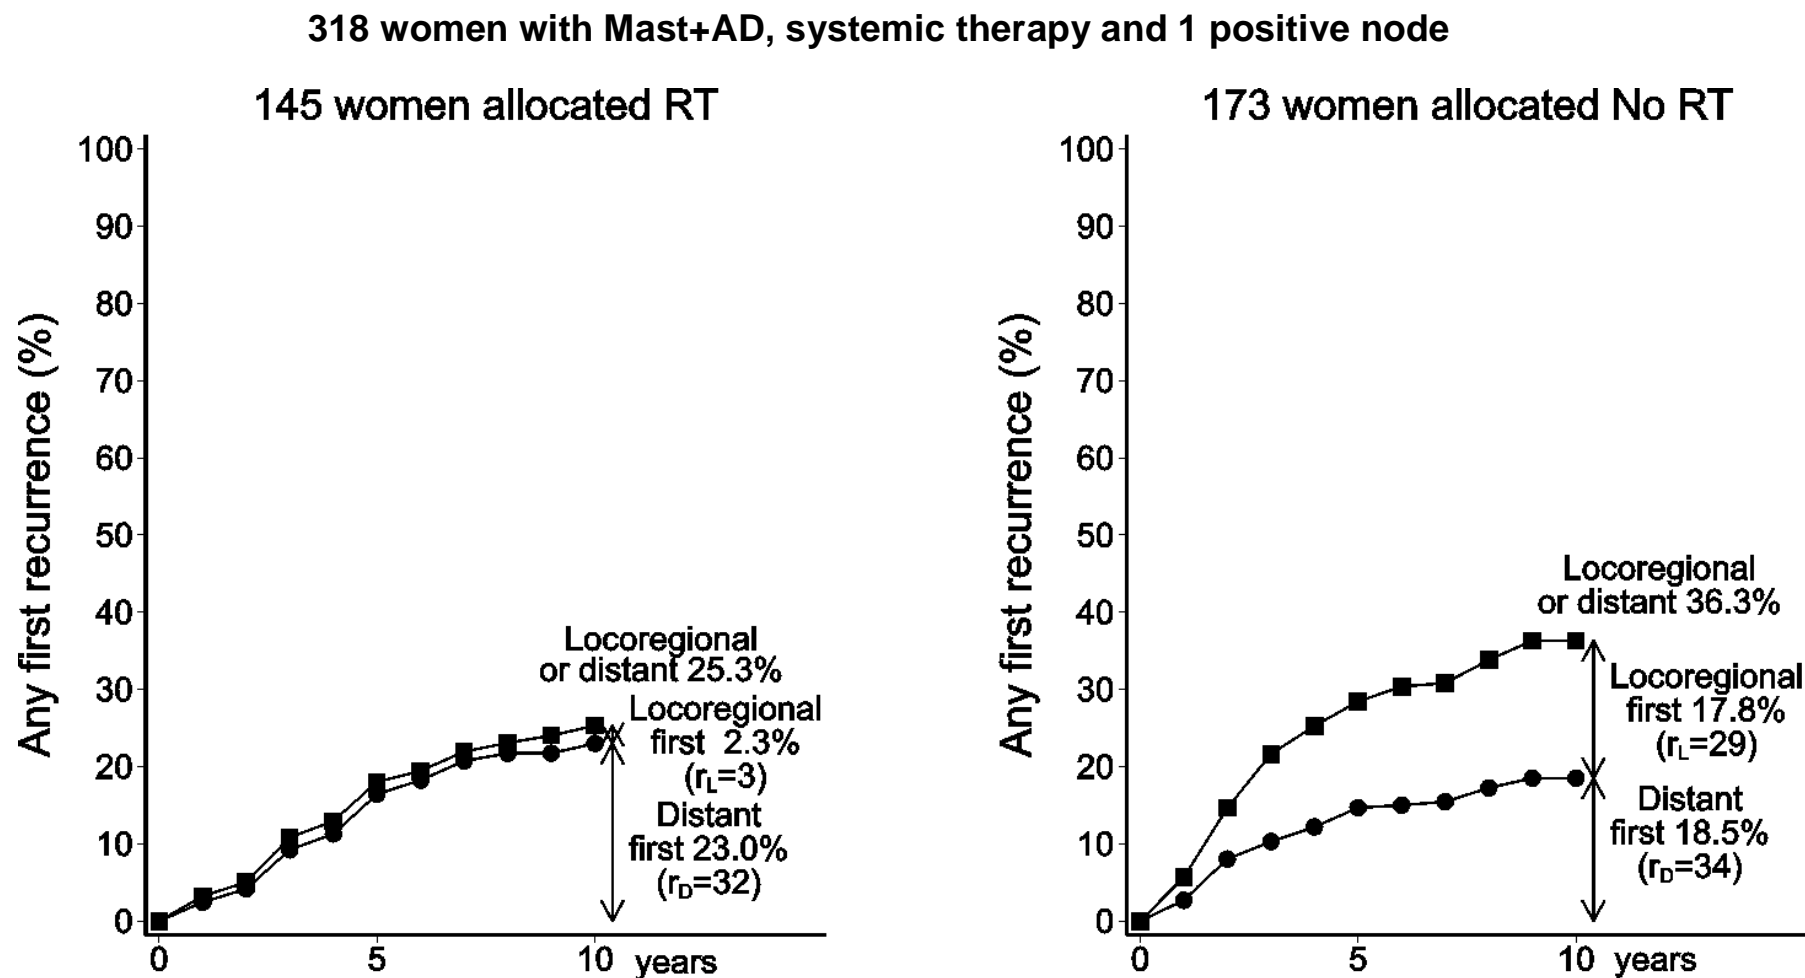

2p for difference between treatment arms in the proportion of all first recurrences that were locoregional: = 0.0001

**Webfigure 14. Effect of radiotherapy (RT) to the chest wall and regional lymph nodes versus not after mastectomy and axillary dissection (Mast+AD):** 10-year risk of recurrence and type of first recurrence, by allocated treatment, in 365 women with 2-3 pathologically positive nodes (pN2-3) and where systemic therapy was given to both randomised treatment groups. ( $r_L$  = number of women for whom first recurrence was locoregional,  $r_D$  = number women for whom distant recurrence was first.)

### 365 women with Mast+AD, systemic therapy and 2-3 positive nodes

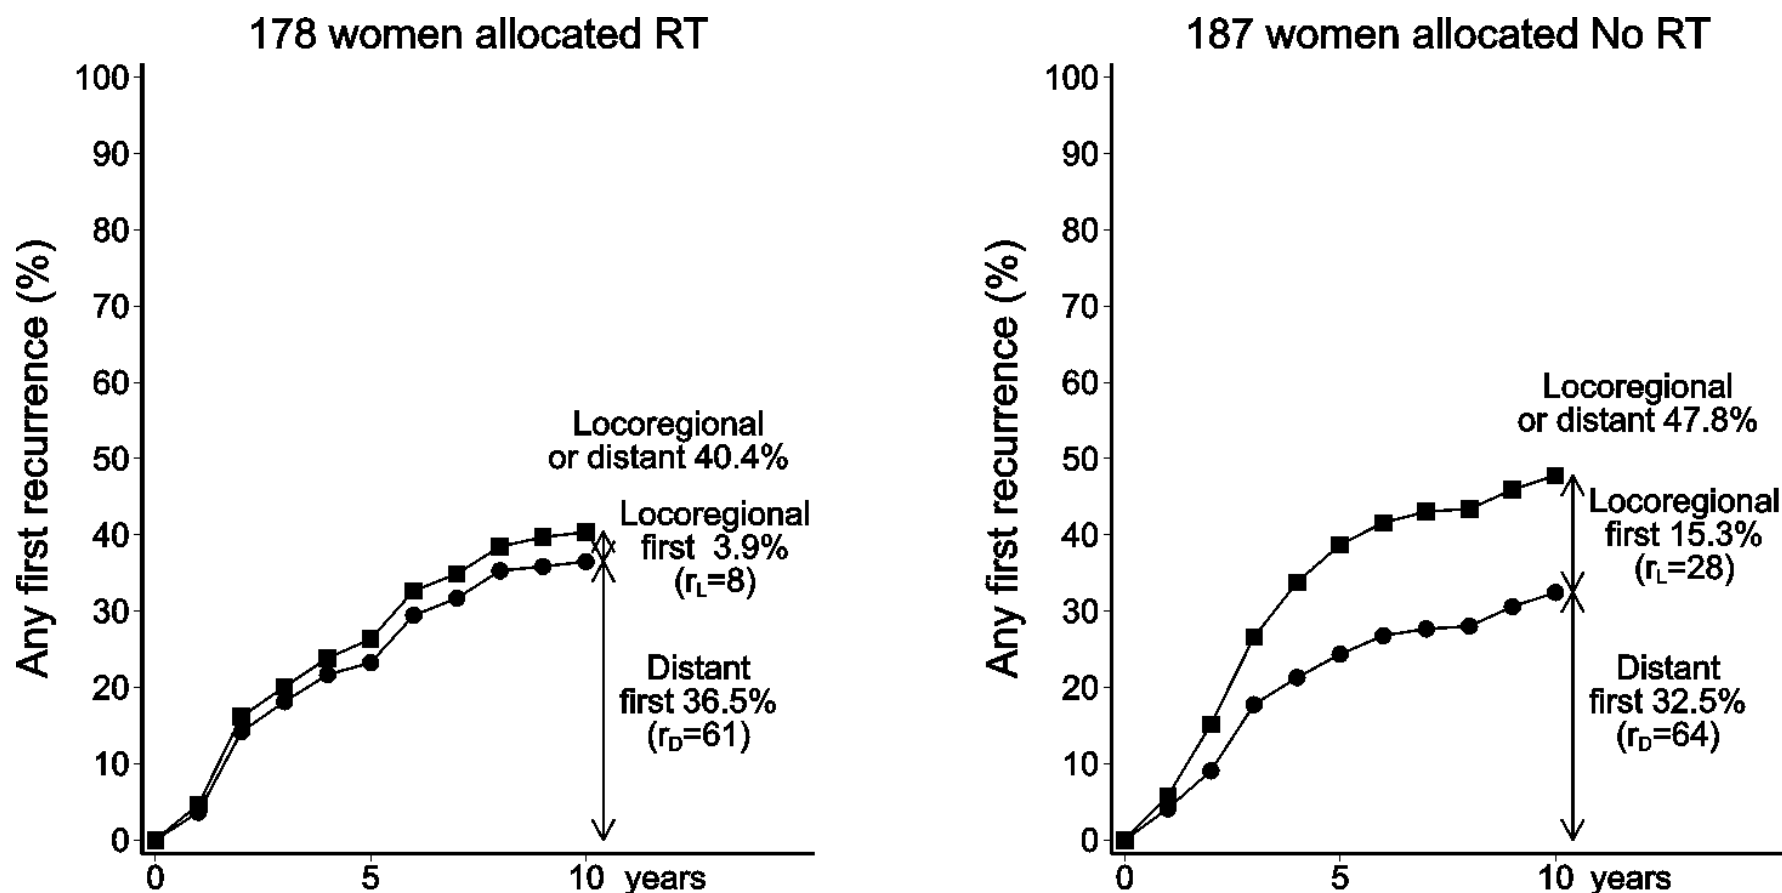

2p for difference between treatment arms in the proportion of all first recurrences that were locoregional: = 0.007

**Webfigure 15. Effect of radiotherapy (RT) to the chest wall and regional lymph nodes versus not after mastectomy and axillary dissection (Mast+AD):** 10-year risk of recurrence and type of first recurrence, by allocated treatment, in 450 women with 1-3 pathologically positive nodes (pN1-3) but the exact number of positive nodes unknown and where systemic therapy was given to both randomised treatment groups. ( $r_L$  = number of women for whom first recurrence was locoregional,  $r_D$  = number women for whom distant recurrence was first.)

### 450 pN1-3 women but exact number of positive nodes unknown, Mast+AD and systemic therapy

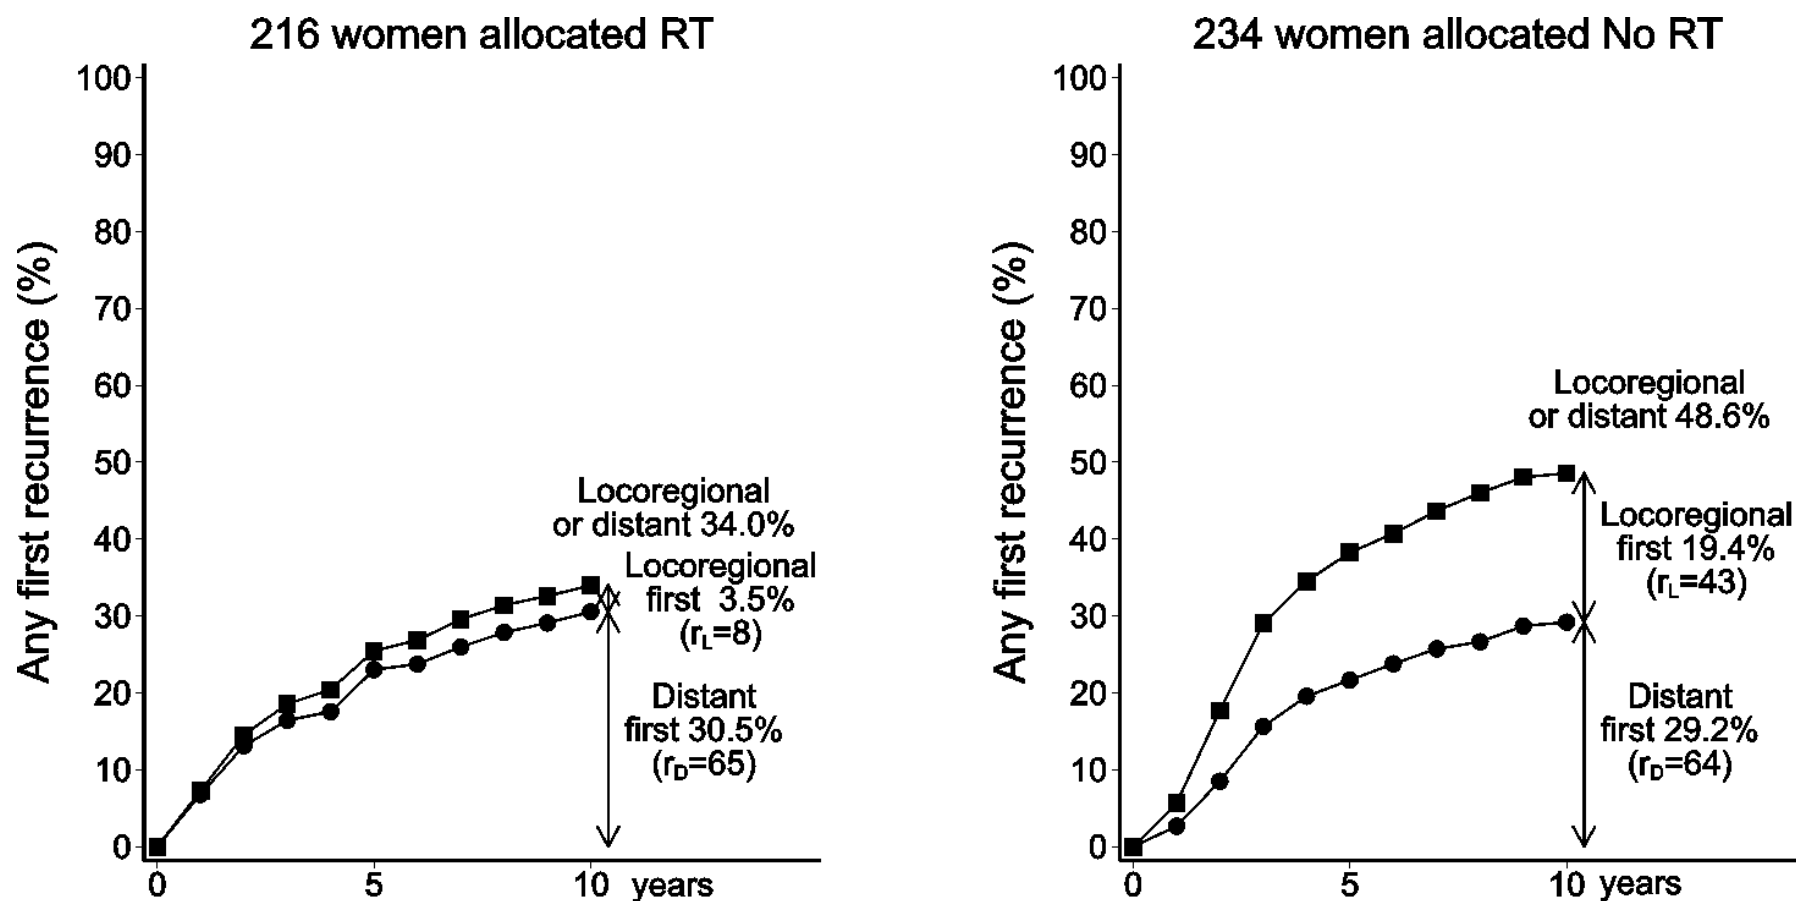

2p for difference between treatment arms in the proportion of all first recurrences that were locoregional: = 0.00002

**Webfigure 16. Effect of radiotherapy (RT) to the chest wall and regional lymph nodes versus not after mastectomy and axillary dissection (Mast+AD): 10-year risk of locoregional recurrence and recurrence of any type and 20-year risk of breast cancer and all-cause mortality in 1772 women with 4+ pathologically positive nodes (pN4+). See webfigure 1 for methodological note and also webfigure 17.**

## 1772 pN4+ women with Mast+AD

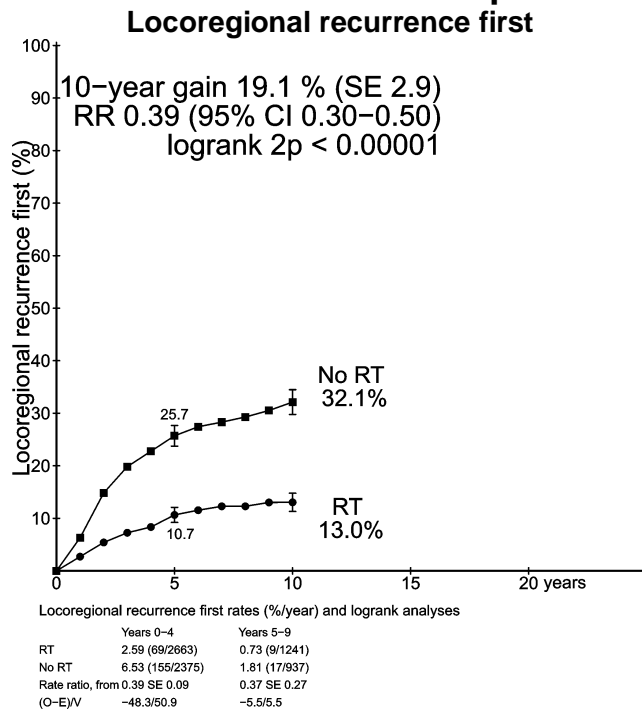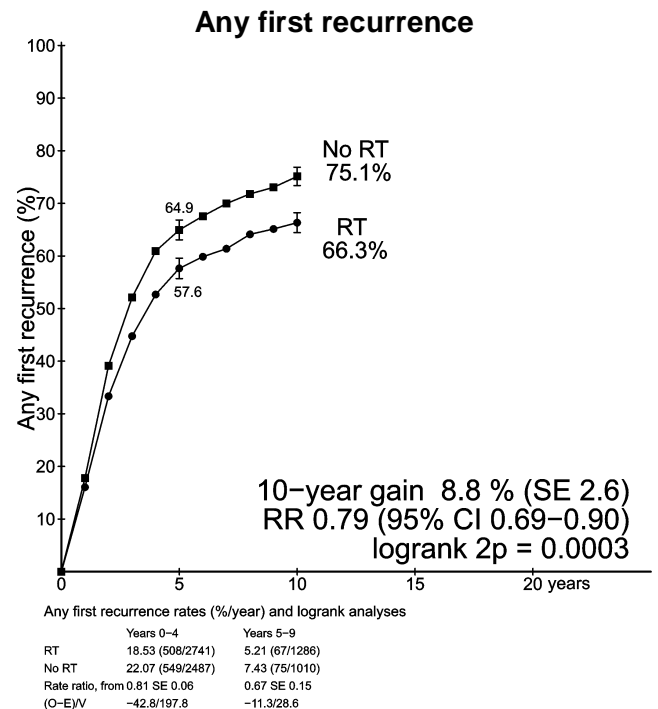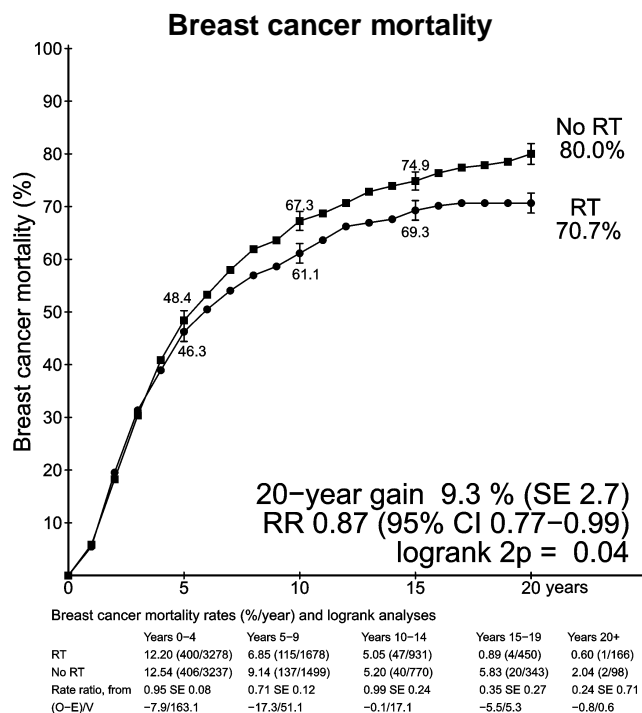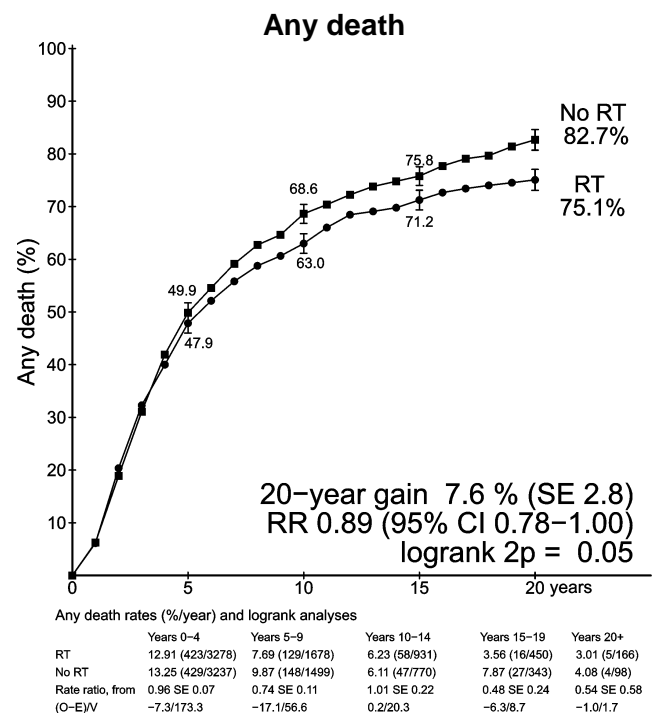

**Webfigure 17. Effect of radiotherapy (RT) to the chest wall and regional lymph nodes versus not after mastectomy and axillary dissection (Mast+AD): 10-year risk of recurrence and type of first recurrence, by allocated treatment, in 1772 women with 4+ pathologically positive nodes (pN4+).**  
 ( $r_L$  = number of women for whom first recurrence was locoregional,  $r_D$  = number women for whom distant recurrence was first.)

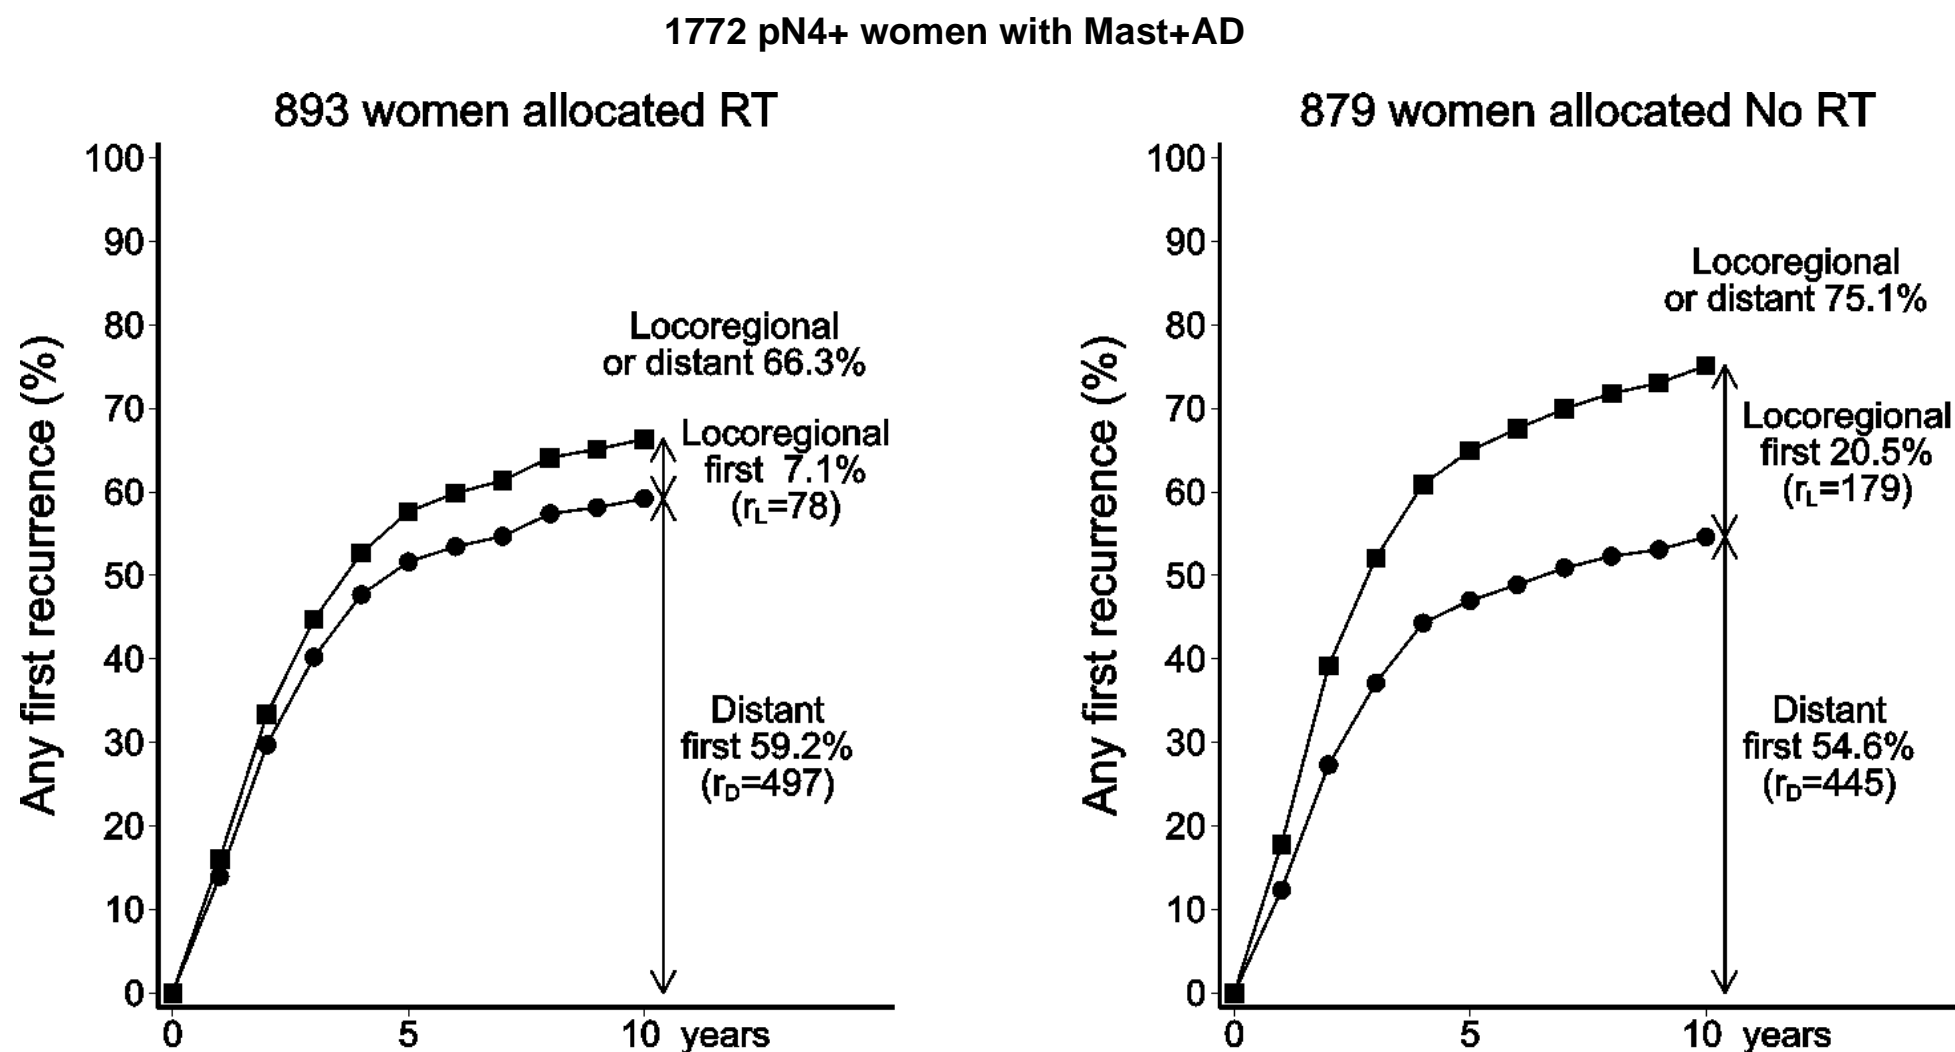

2p for difference between treatment arms in the proportion of all first recurrences that were locoregional:  $< 0.00001$

**Webfigure 18. Effect of radiotherapy (RT) to the chest wall and regional lymph nodes versus not after mastectomy and axillary dissection (Mast+AD):** Event rate ratios and 95% confidence intervals for locoregional recurrence and recurrence of any type during years 0-9 and for breast cancer mortality in 1772 women with 4+ pathologically positive nodes (pN4+) by prognostic and other factors. Categories with unknowns are excluded from the heterogeneity and trend tests.

## 1772 pN4+ women with Mast+AD

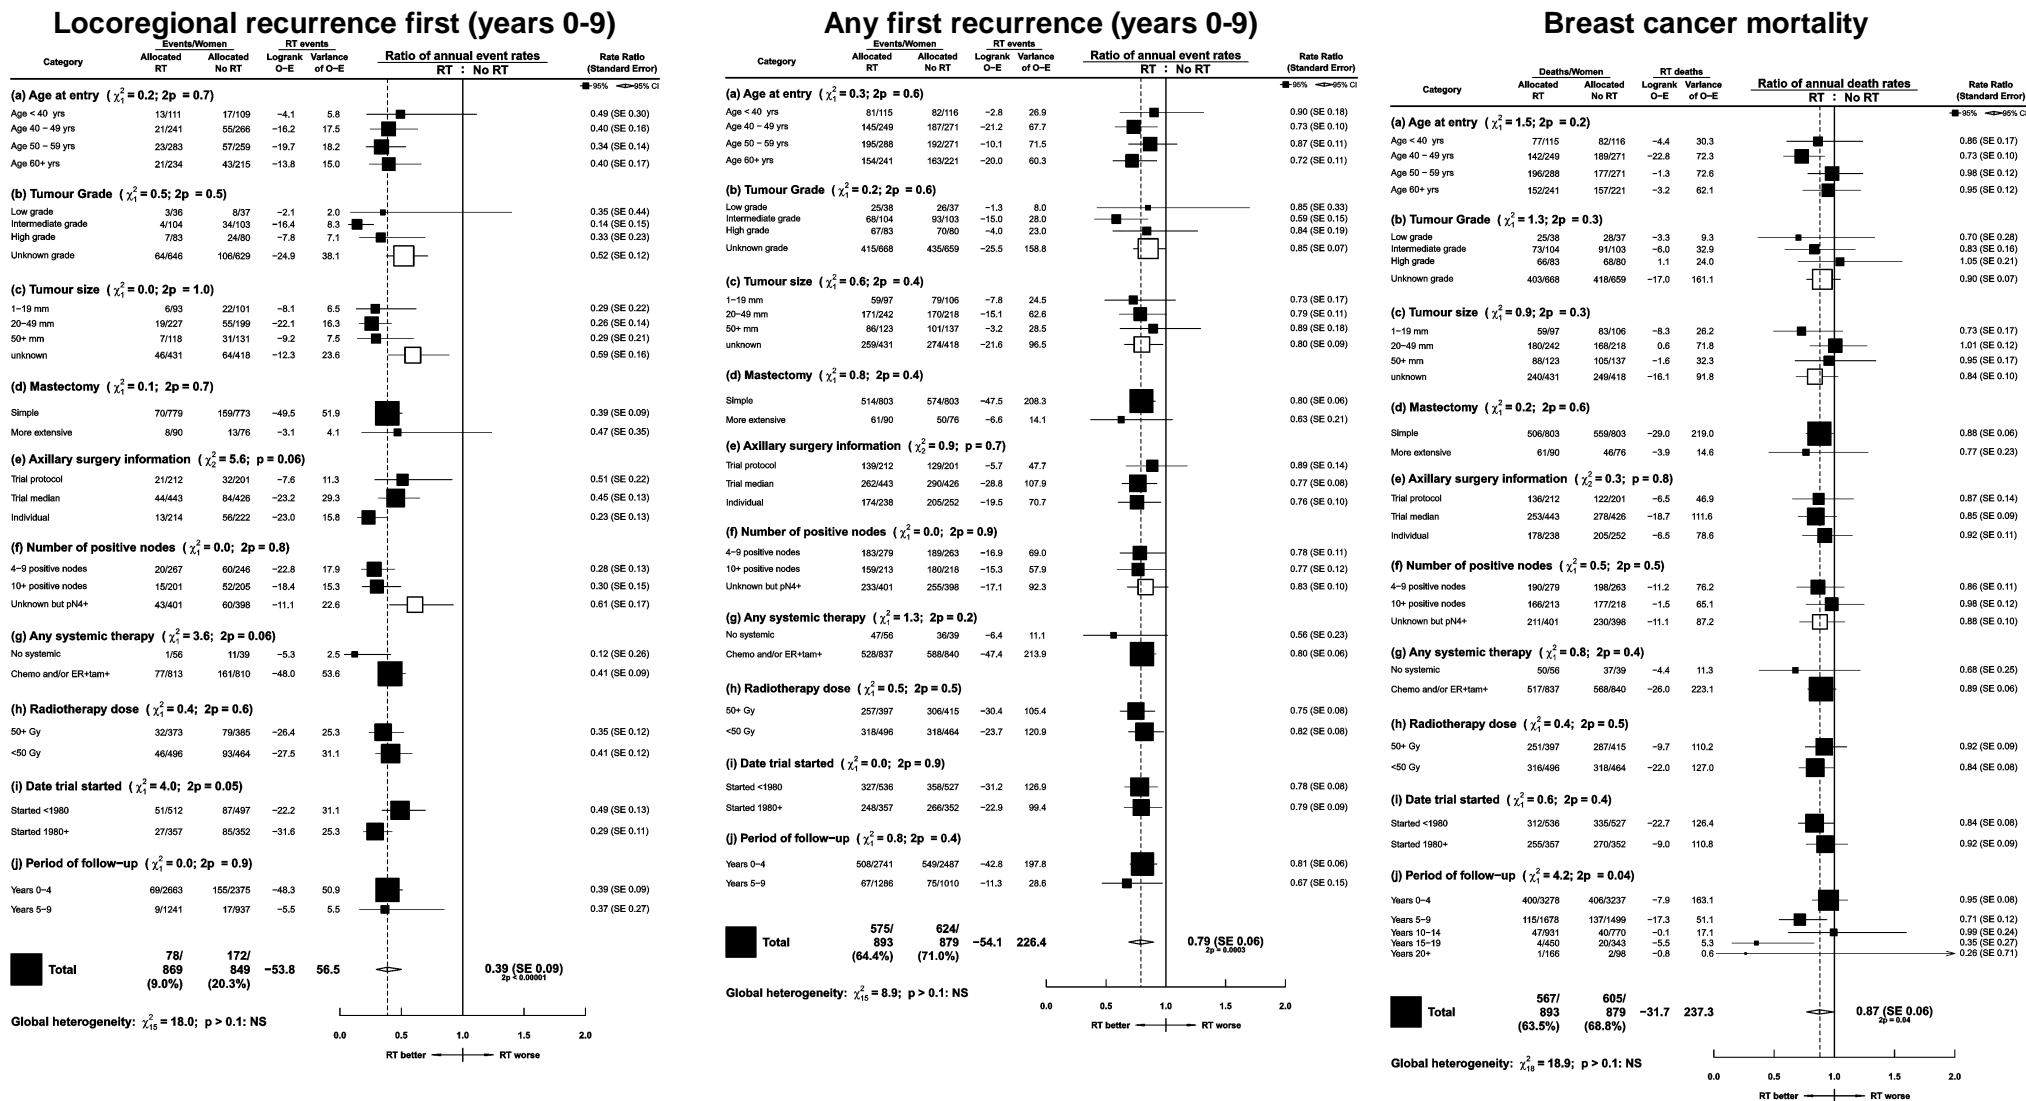

**Webfigure 19. Effect of radiotherapy (RT) to the chest wall and regional lymph nodes versus not after mastectomy and axillary dissection (Mast+AD): 10-year risk of locoregional recurrence and recurrence of any type and 20-year risk of breast cancer and all-cause mortality in 1677 women with 4+ pathologically positive nodes (pN4+) in trials where systemic therapy was given to both randomised treatment groups. See webfigure 1 for methodological note and also webfigure 20.**

### 1677 pN4+ women with Mast+AD and systemic therapy

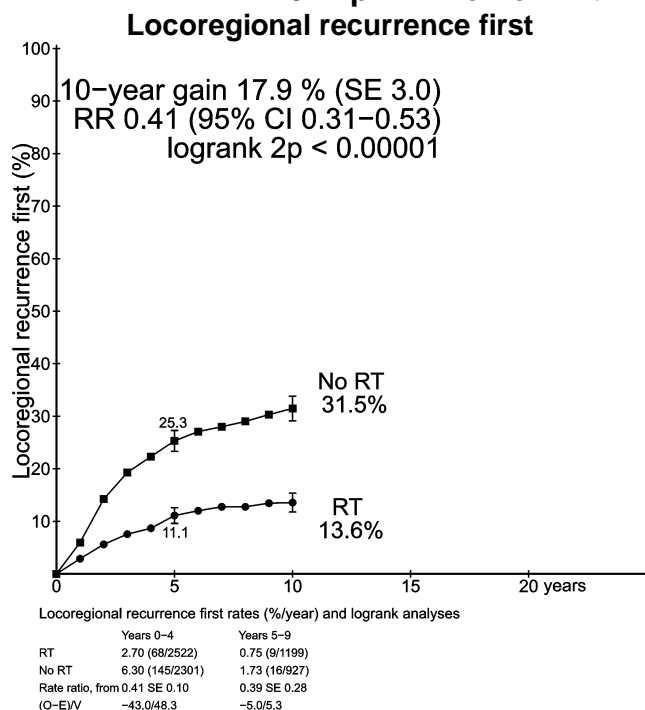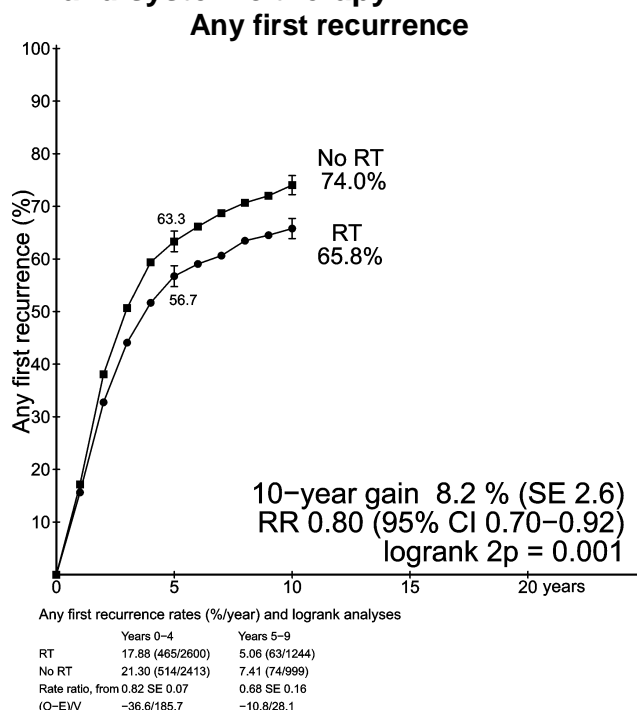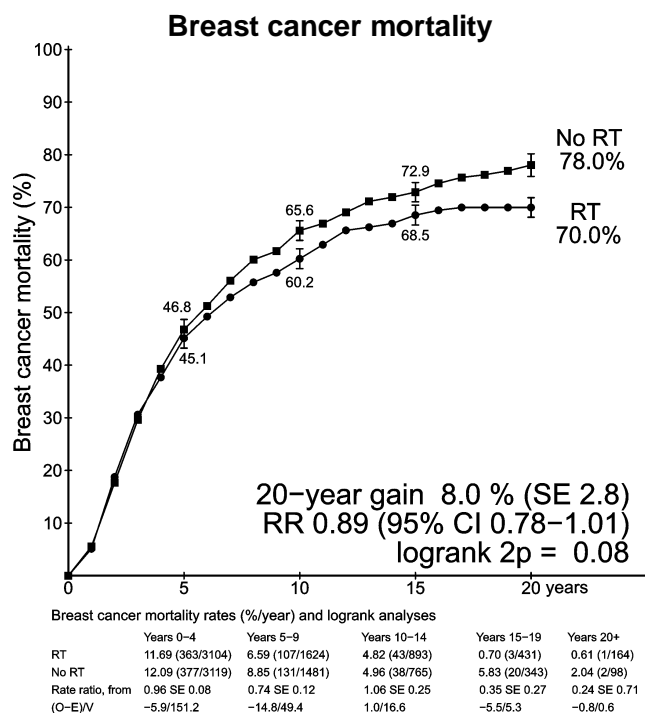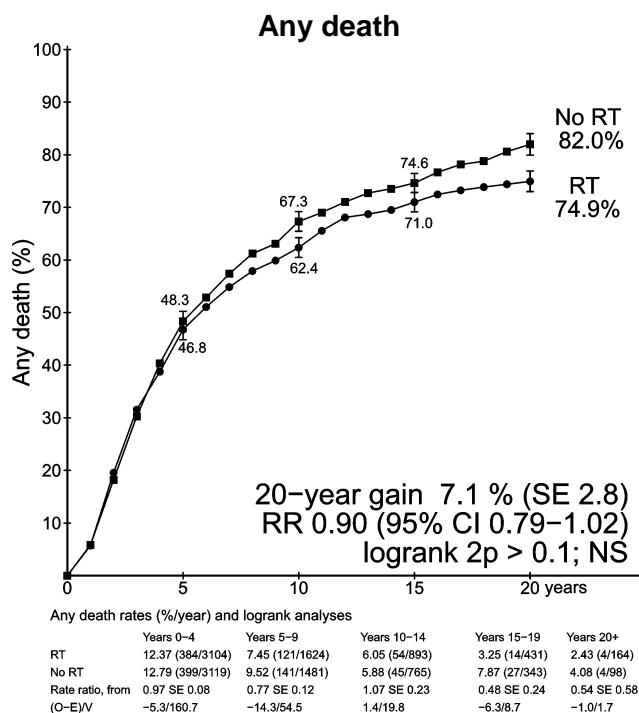

**Webfigure 20. Effect of radiotherapy (RT) to the chest wall and regional lymph nodes versus not after mastectomy and axillary dissection (Mast+AD):** 10-year risk of recurrence and type of first recurrence, by allocated treatment, in 1677 women with 4+ pathologically positive nodes (pN4+) in trials where systemic therapy was given to both randomised treatment groups. ( $r_L$  = number of women for whom first recurrence was locoregional,  $r_D$  = number women for whom distant recurrence was first.)

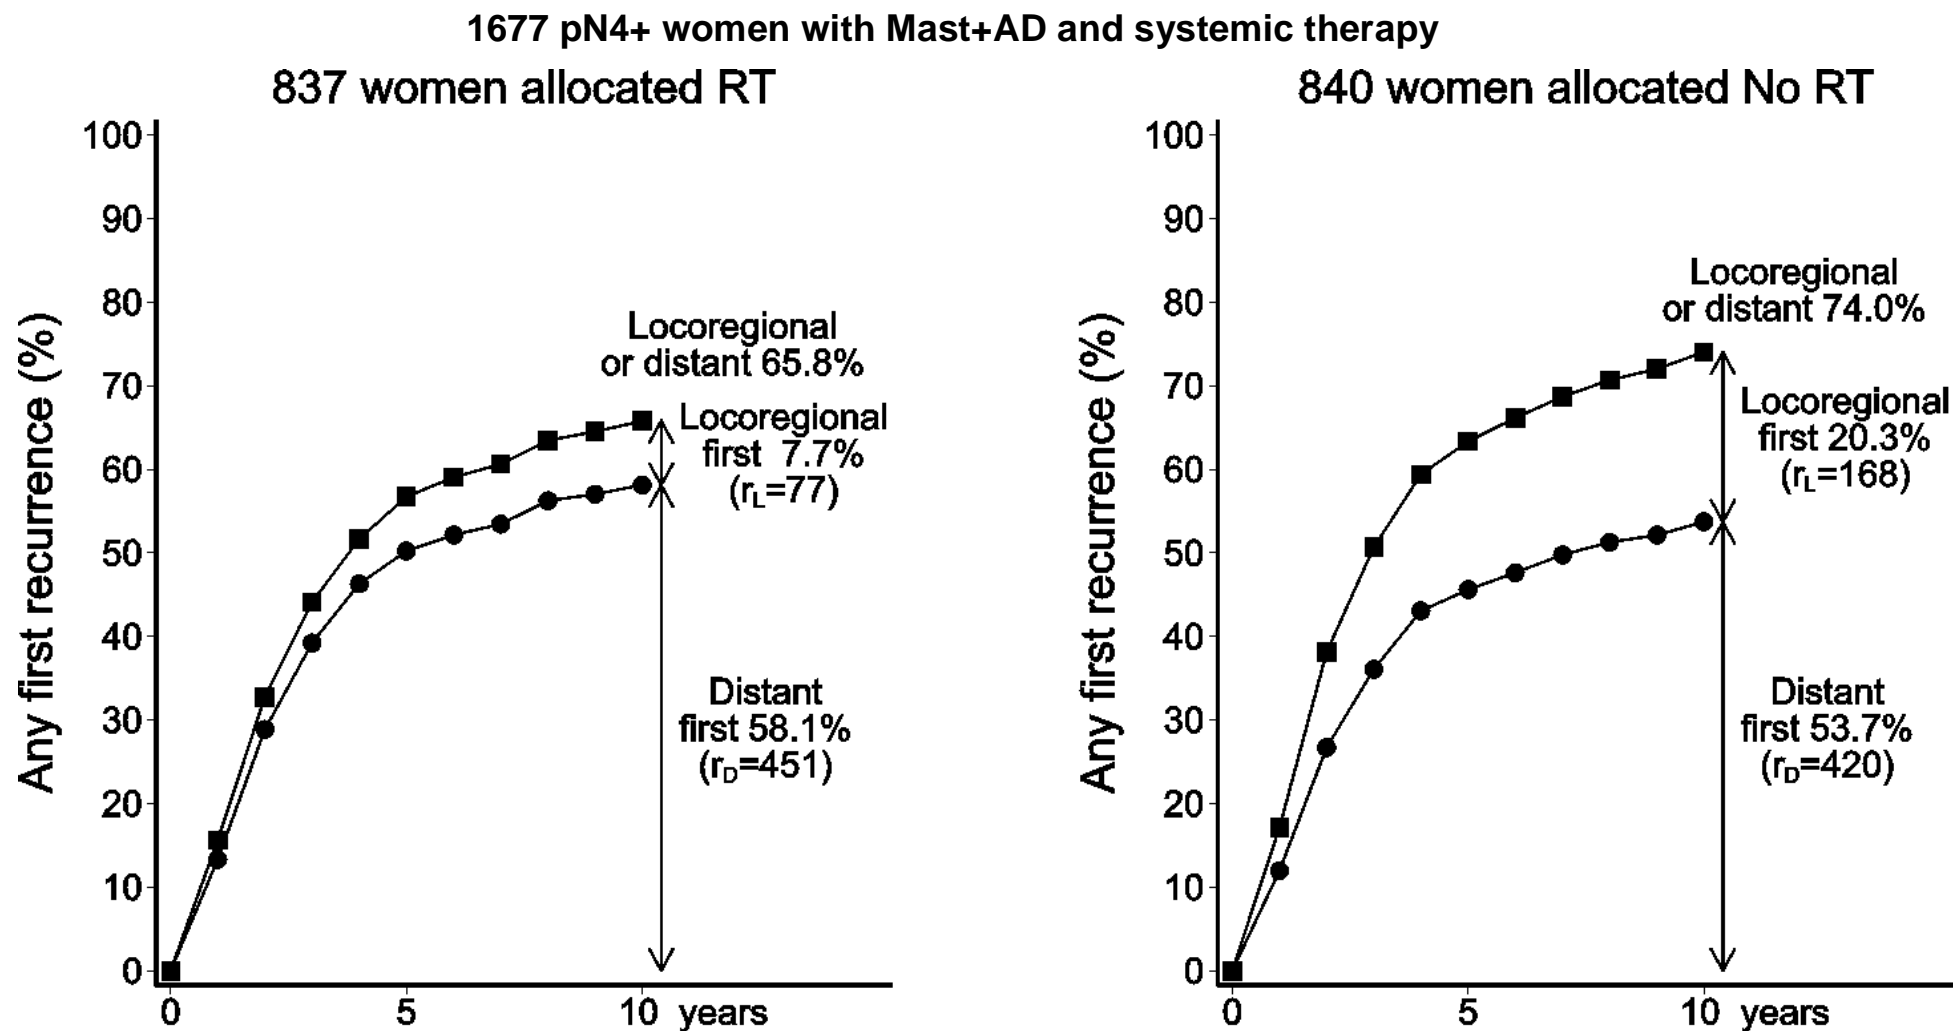

2p for difference between treatment arms in the proportion of all first recurrences that were locoregional: < 0.00001

**Webfigure 21. Effect of radiotherapy (RT) to the chest wall and regional lymph nodes versus not after mastectomy and axillary dissection (Mast+AD): 10-year risk of locoregional recurrence and recurrence of any type and 15-year risk of breast cancer mortality in 1677 women with 4+ pathologically positive nodes (pN4+) in trials where systemic therapy was given to both randomised treatment groups subdivided according to number of positive nodes. See webfigure 1 for methodological note and also webfigures 22-24.**

### Locoregional recurrence first

### Any first recurrence

### Breast cancer mortality

#### 479 women with Mast+AD, systemic therapy and 4-9 positive nodes

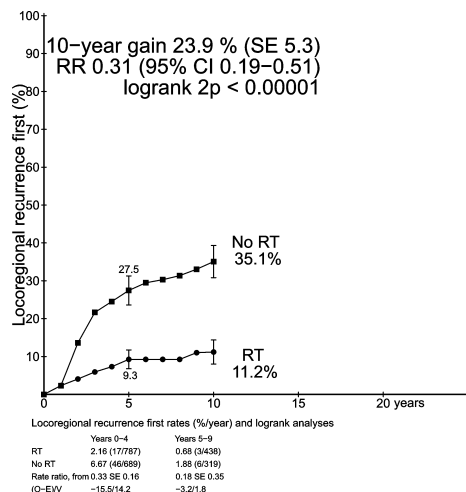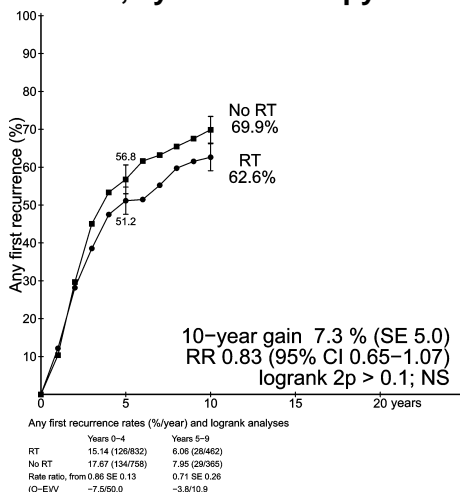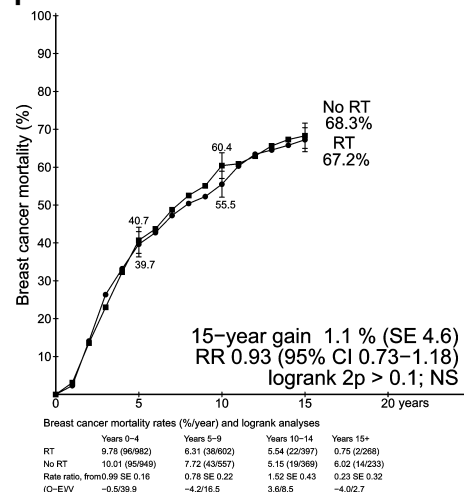

#### 403 women with Mast+AD, systemic therapy and 10+ positive nodes

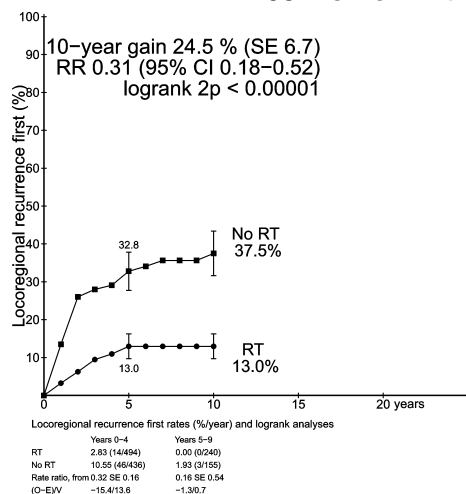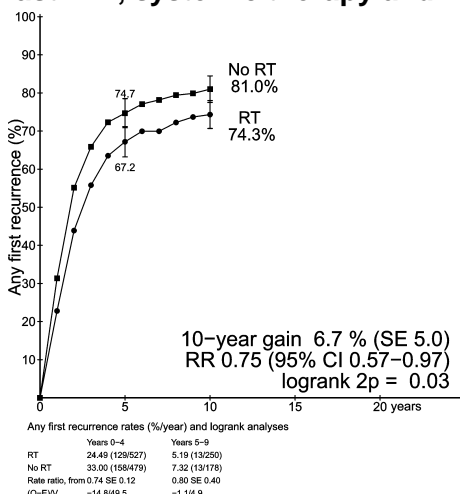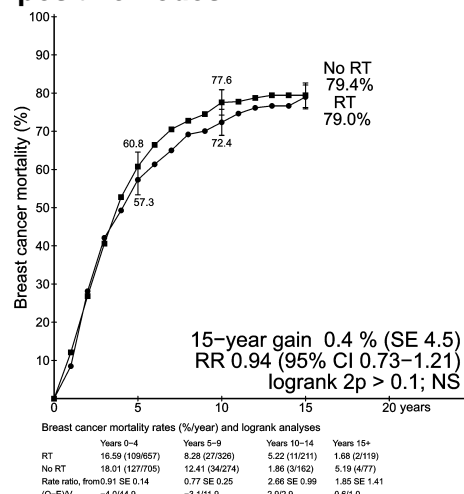

#### 795 pN4+ women with exact number of positive nodes unknown, Mast+AD and systemic therapy

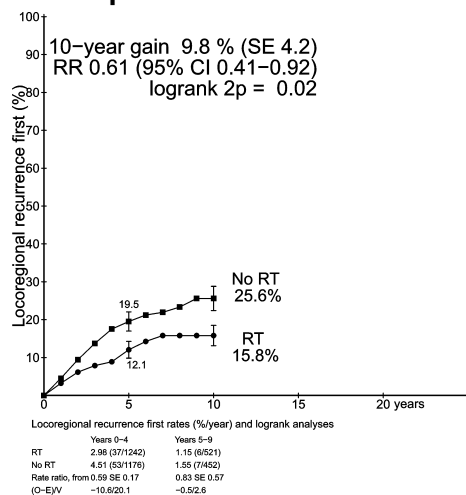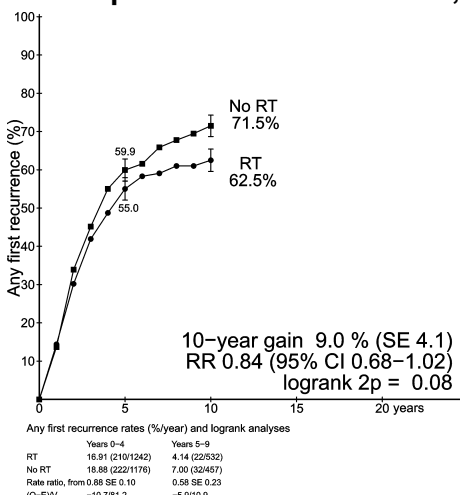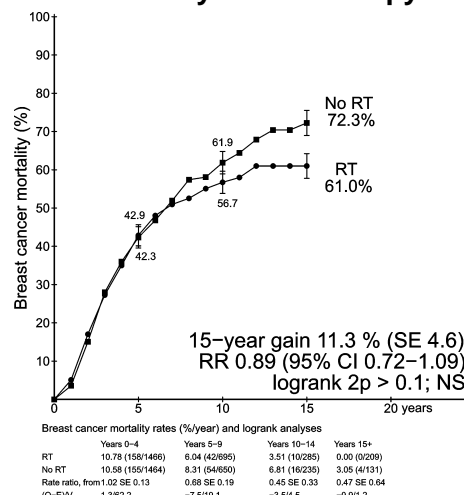

**Webfigure 22. Effect of radiotherapy (RT) to the chest wall and regional lymph nodes versus not after mastectomy and axillary dissection (Mast+AD):** 10-year risk of recurrence and type of first recurrence, by allocated treatment, in 479 women with 4-9 pathologically positive nodes (pN4-9) in trials where systemic therapy was given to both randomised treatment groups. ( $r_L$  = number of women for whom first recurrence was locoregional,  $r_D$  = number women for whom distant recurrence was first.)

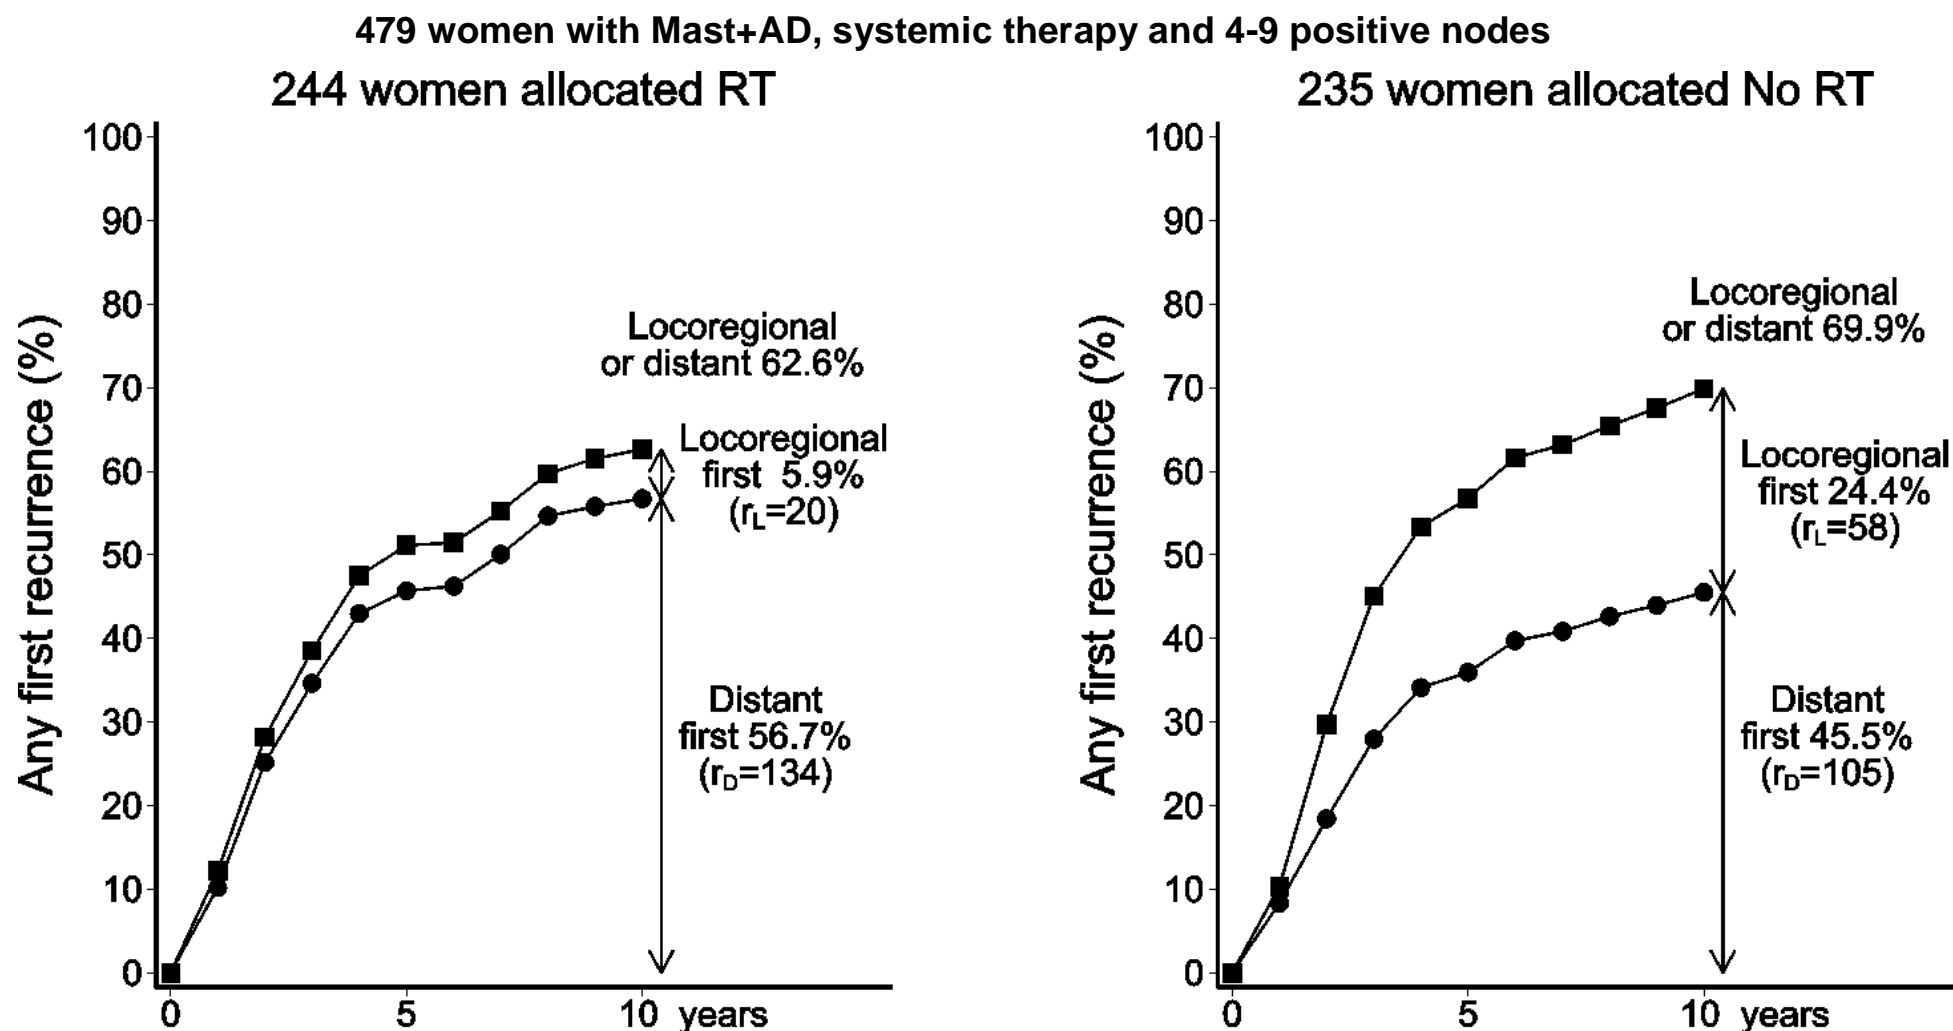

2p for difference between treatment arms in the proportion of all first recurrences that were locoregional: < 0.00001

**Webfigure 23. Effect of radiotherapy (RT) to the chest wall and regional lymph nodes versus not after mastectomy and axillary dissection (Mast+AD):** 10-year risk of recurrence and type of first recurrence, by allocated treatment, in 403 women with 10+ pathologically positive nodes (pN10+) in trials where systemic therapy was given to both randomised treatment groups. ( $r_L$  = number of women for whom first recurrence was locoregional,  $r_D$  = number women for whom distant recurrence was first.)

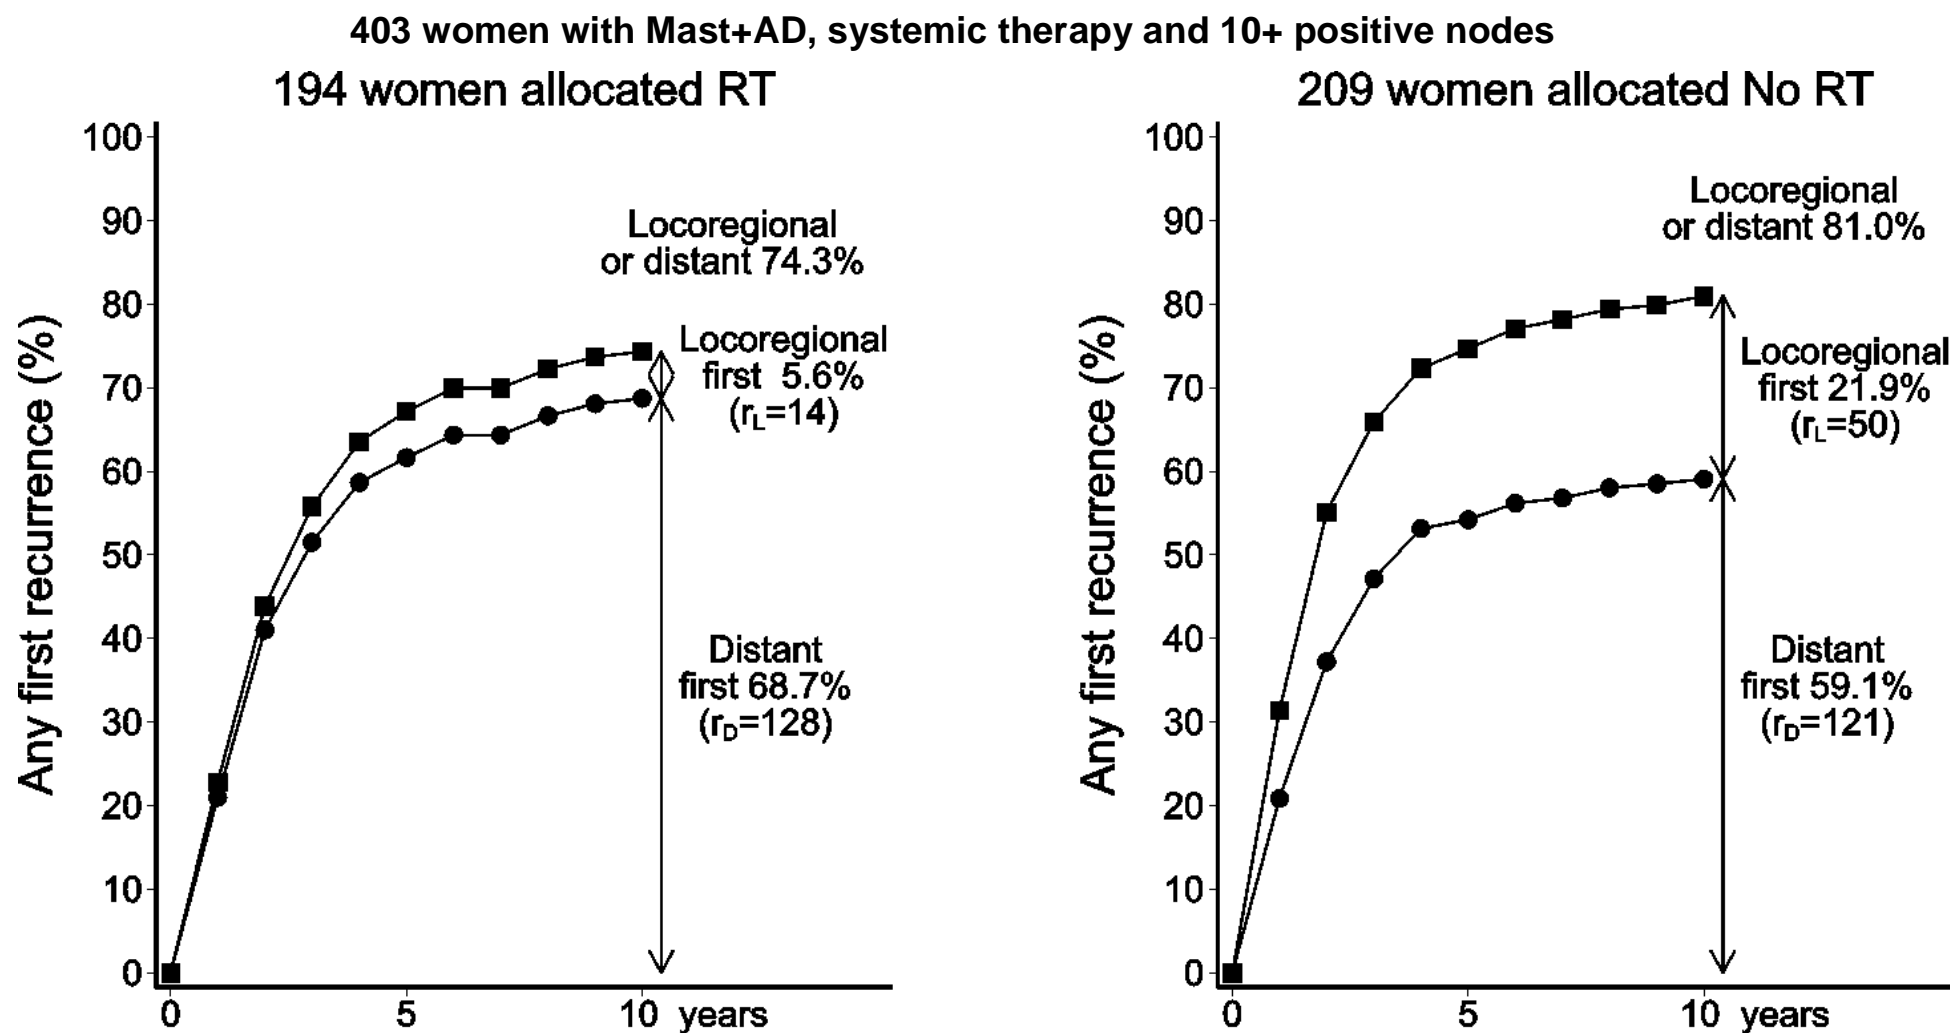

2p for difference between treatment arms in the proportion of all first recurrences that were locoregional: = 0.00002

**Webfigure 24. Effect of radiotherapy (RT) to the chest wall and regional lymph nodes versus not after mastectomy and axillary dissection (Mast+AD):** 10-year risk of recurrence and type of first recurrence, by allocated treatment, in 795 women with 4+ pathologically positive nodes but the exact number of positive nodes unknown in trials where systemic therapy was given to both randomised treatment groups. ( $r_L$  = number of women for whom first recurrence was locoregional,  $r_D$  = number women for whom distant recurrence was first.)

**795 pN4+ women but exact number of positive nodes unknown, Mast+AD and systemic therapy**

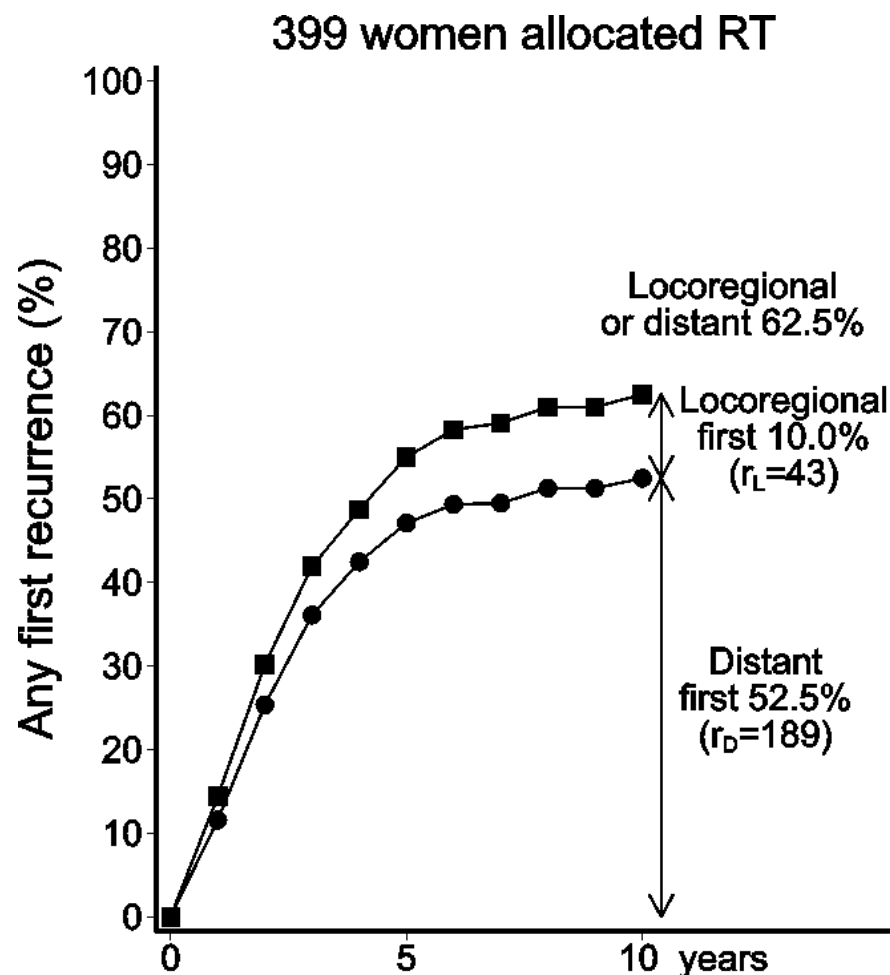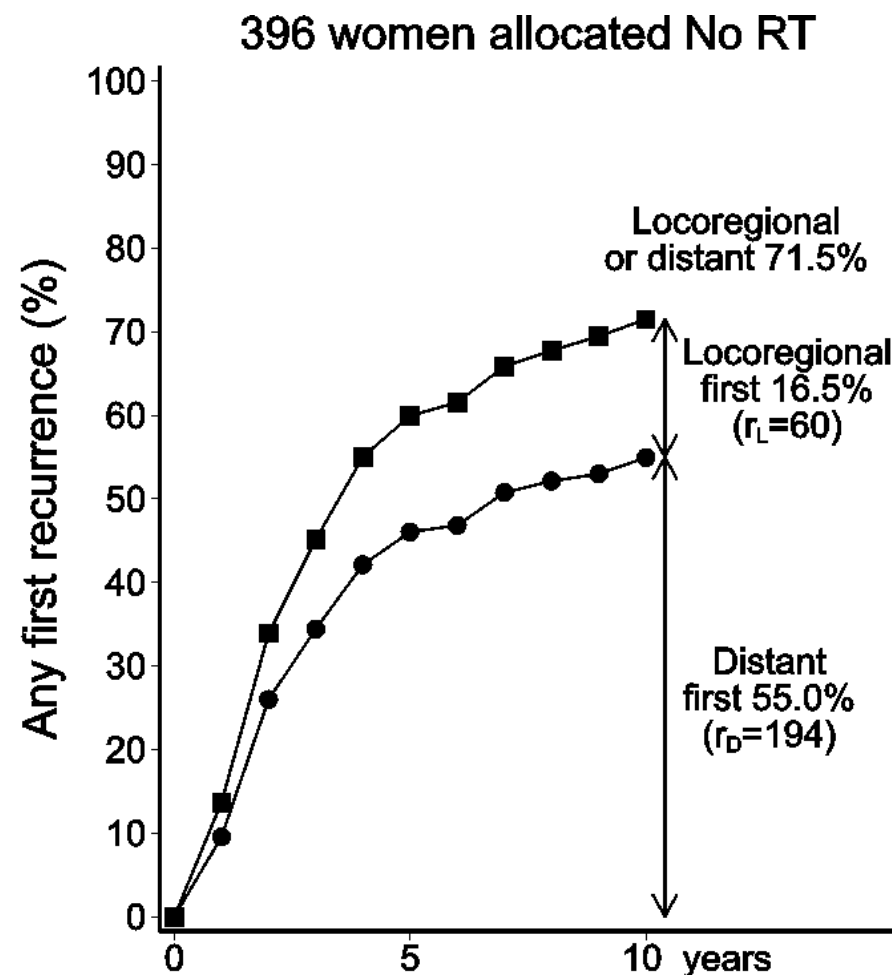

2p for difference between treatment arms in the proportion of all first recurrences that were locoregional:  $> 0.1$ ; NS

**Webfigure 25. Effect of radiotherapy (RT) to the chest wall and regional lymph nodes versus not after mastectomy and axillary sampling (Mast+AS): 10-year risk of locoregional recurrence and recurrence of any type and 20-year risk of breast cancer and all-cause mortality in 870 women with pathologically node-negative (pN0) disease.** See webfigure 1 for methodological note and also webfigure 26. Note: 0 locoregional recurrences, 8 recurrences of any type and 10 breast cancer deaths were reported among the 36 pN0 women with tumours  $\geq 5$  cm who were allocated to receive radiotherapy. 4 locoregional recurrences, 11 recurrences of any type and 9 breast cancer deaths were reported among the 36 pN0 women with tumours  $\geq 5$  cm who were allocated to not to receive radiotherapy.

## 870 pN0 women with Mast+AS

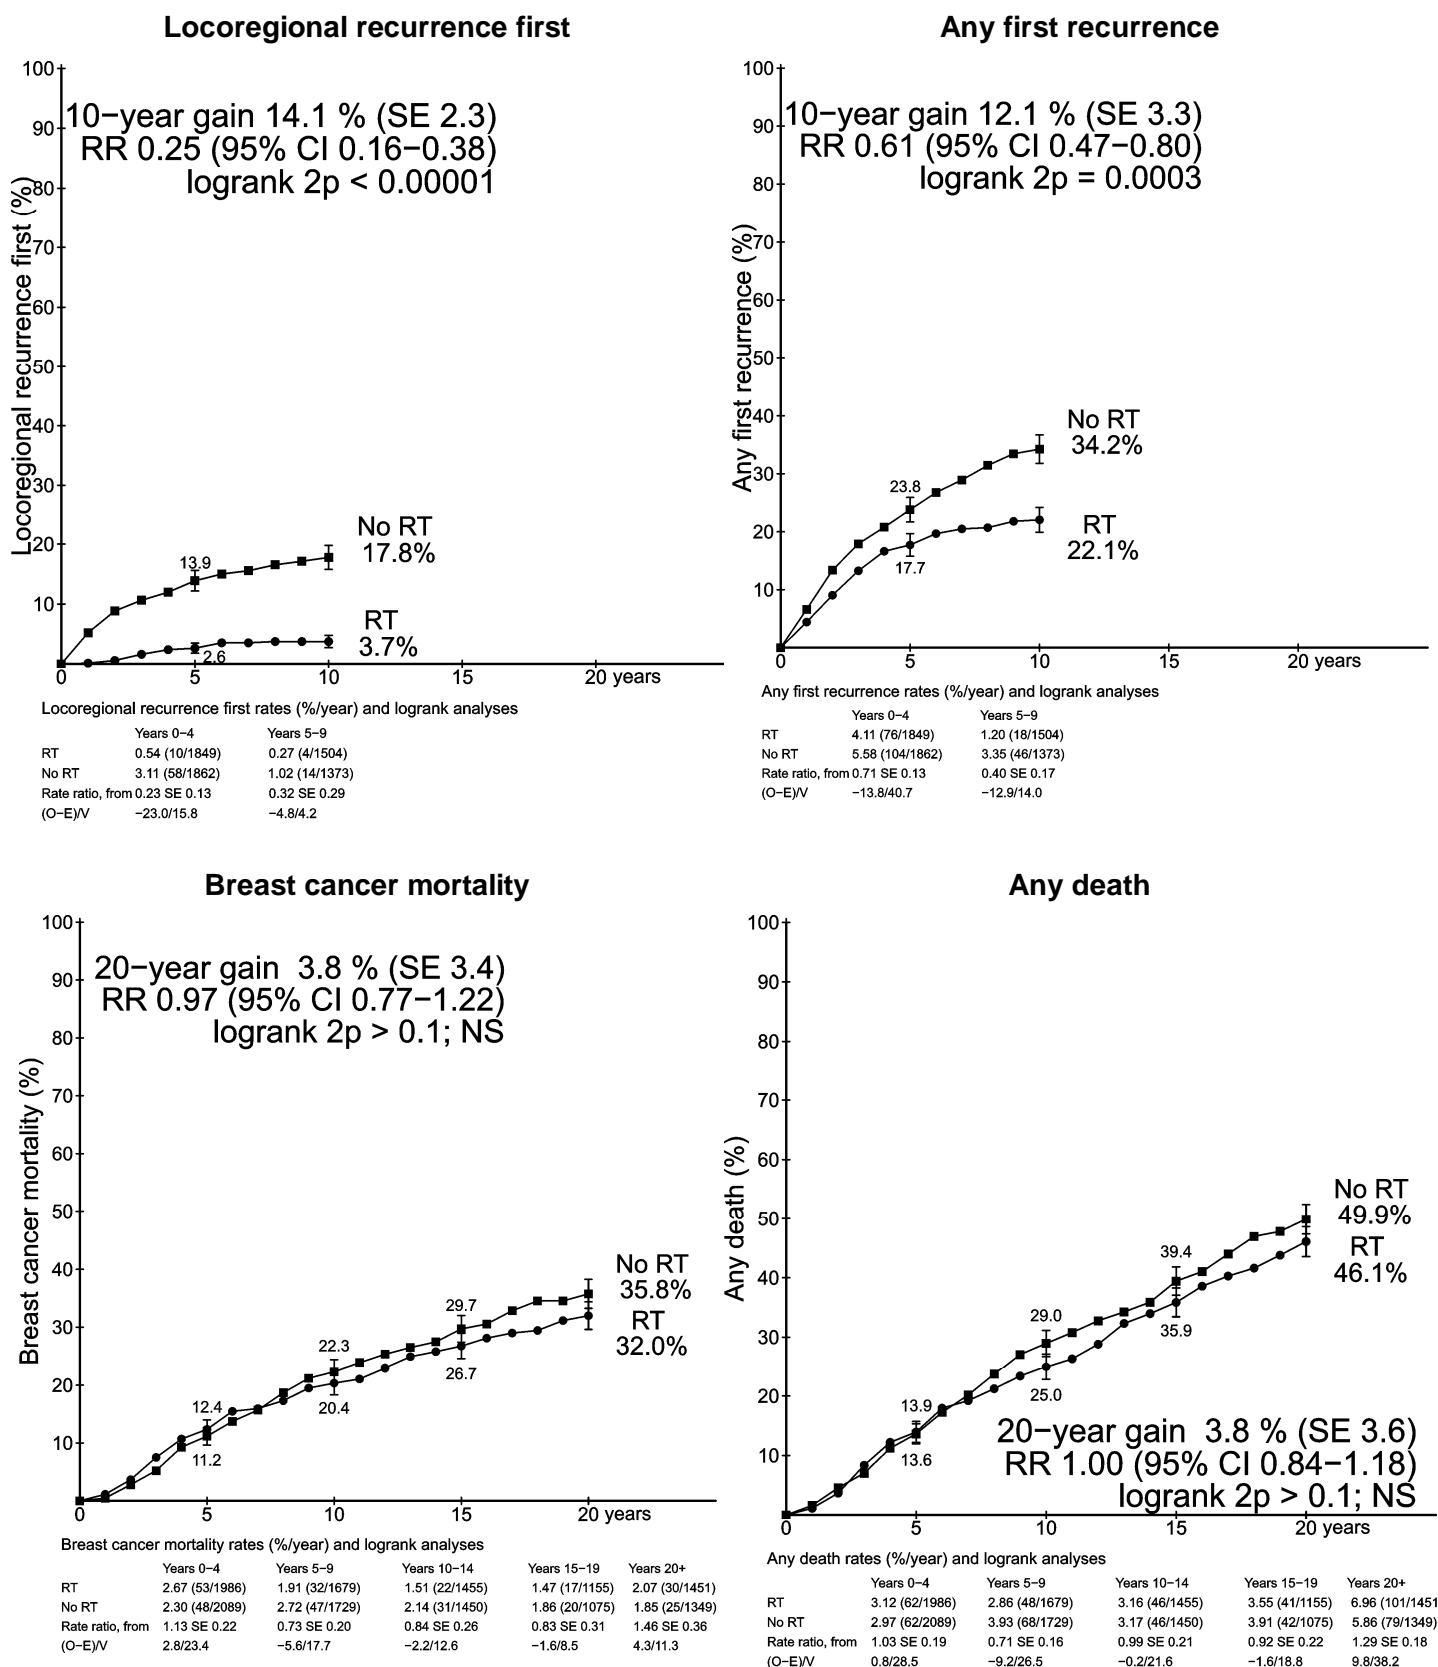

**Webfigure 26. Effect of radiotherapy (RT) to the chest wall and regional lymph nodes versus not after mastectomy and axillary sampling (Mast+AS):** 10-year risk of recurrence and type of first recurrence, by allocated treatment, in 870 women with pathologically node negative (pN0) disease. ( $r_L$  = number of women for whom first recurrence was locoregional,  $r_D$  = number women for whom distant recurrence was first.)

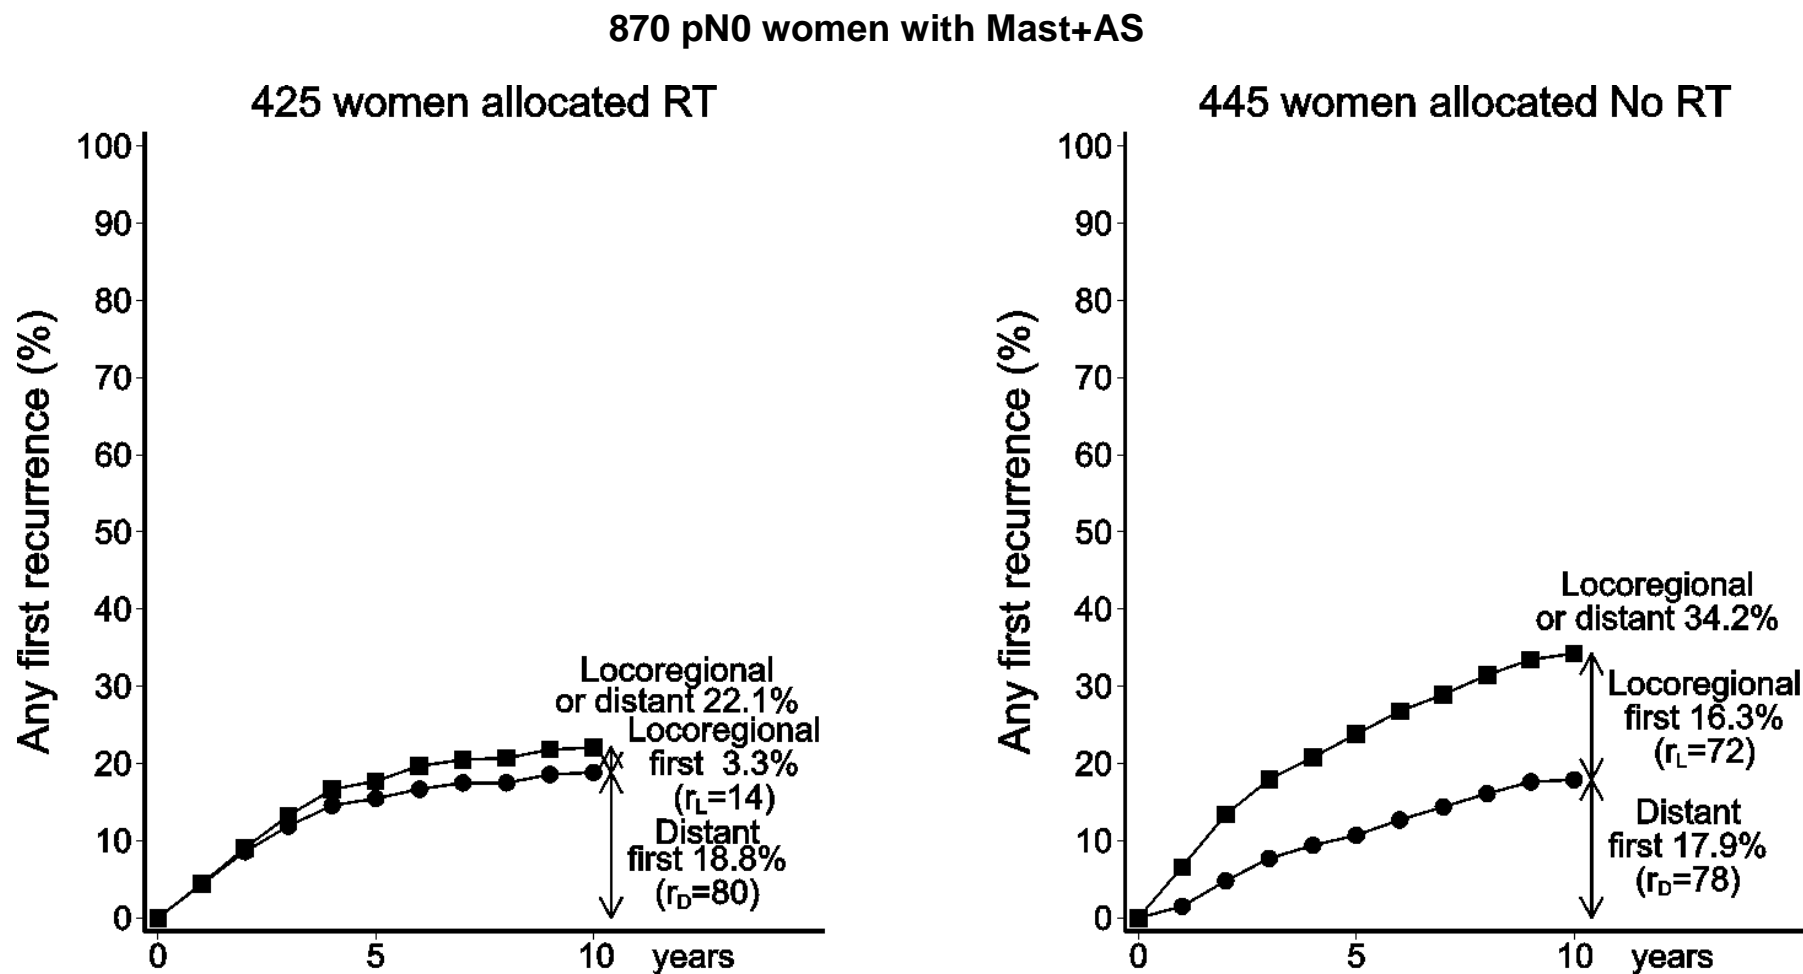

2p for difference between treatment arms in the proportion of all first recurrences that were locoregional:  $< 0.00001$

**Webfigure 27. Effect of radiotherapy (RT) to the chest wall and regional lymph nodes versus not after mastectomy and axillary sampling (Mast+AS): 10-year risk of locoregional recurrence and recurrence of any type and 20-year risk of breast cancer and all-cause mortality in 2541 women with pathologically node-positive (pN+) disease. See webfigure 1 for methodological note and also webfigure 28.**

## 2541 pN+ women with Mast+AS

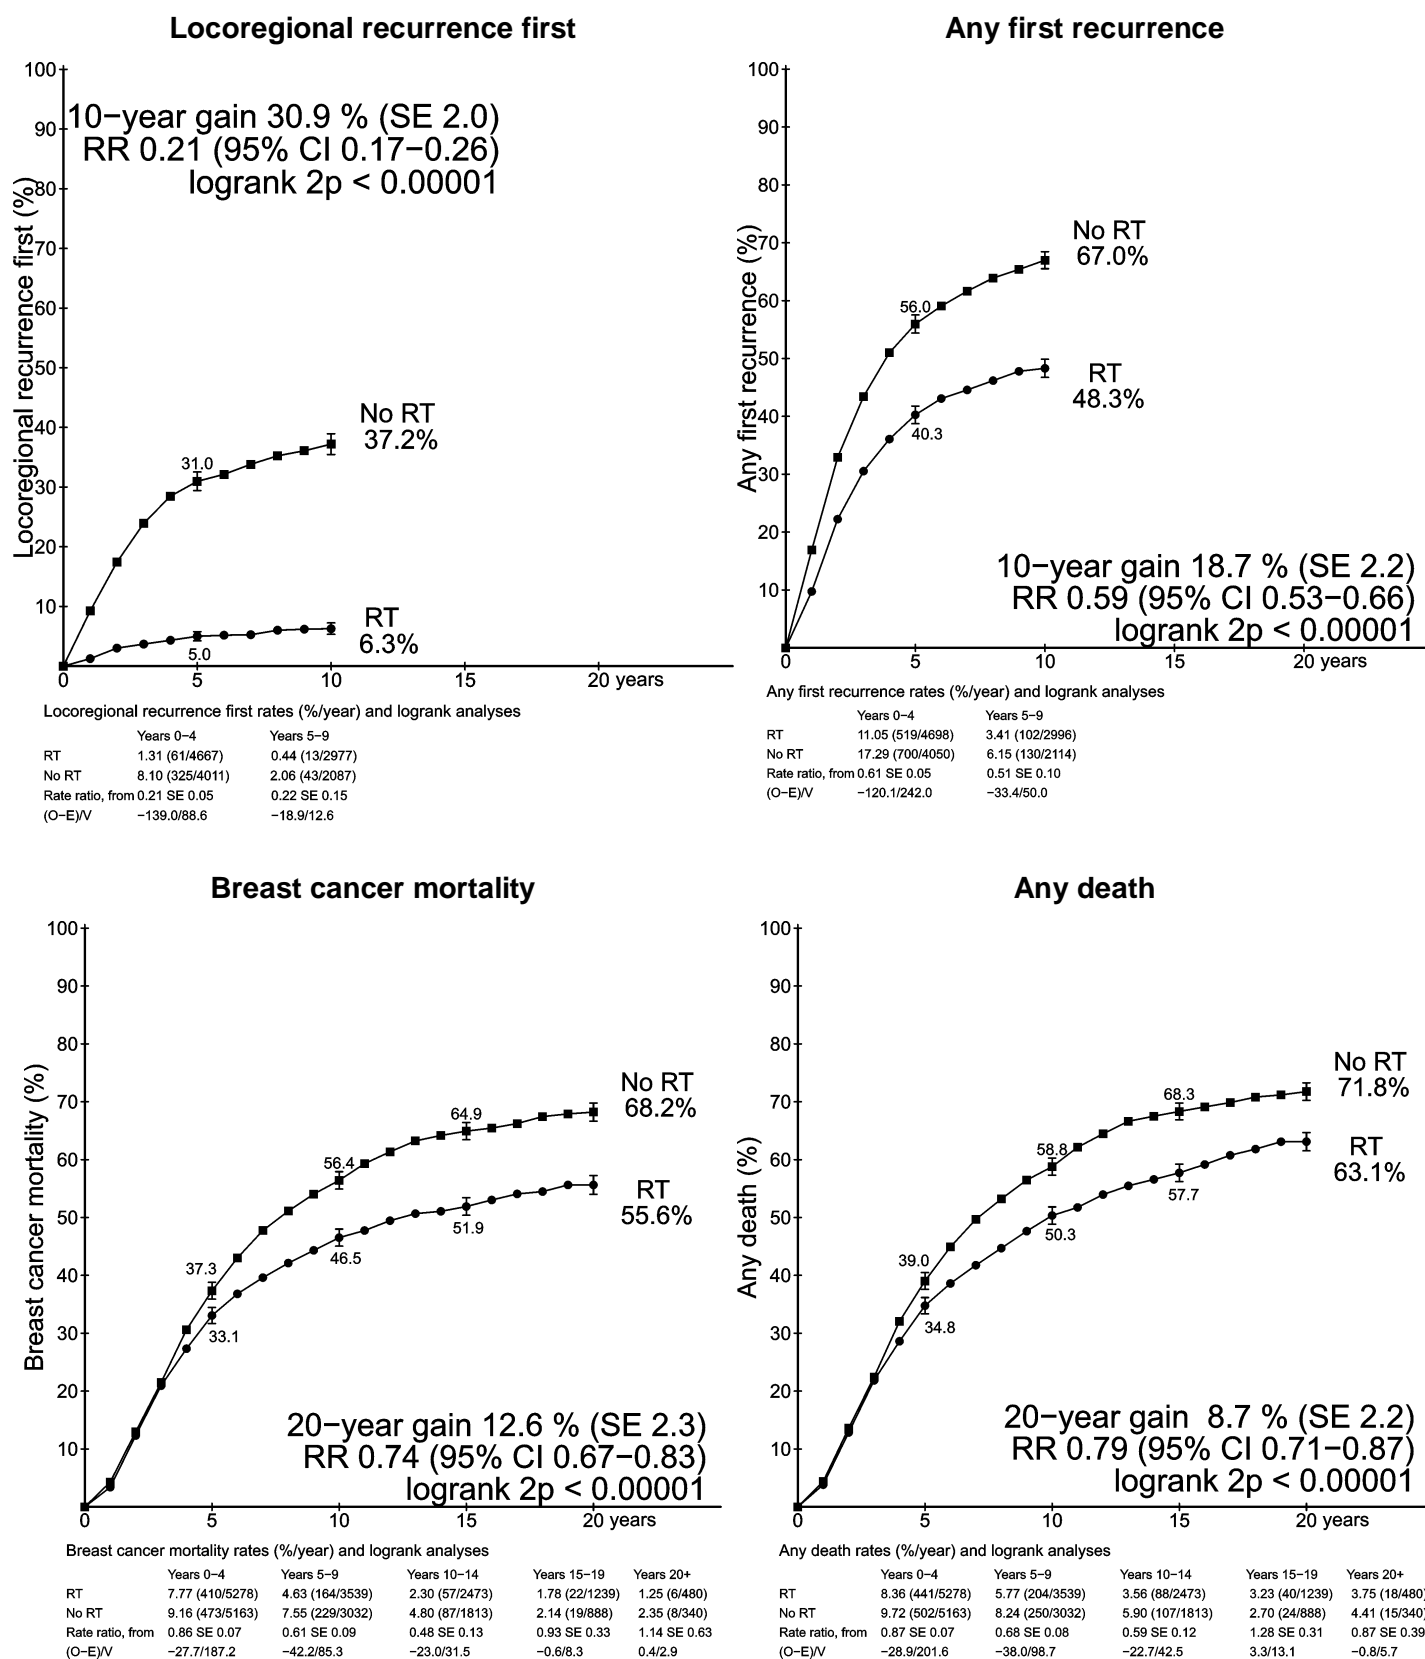

**Webfigure 28. Effect of radiotherapy (RT) to the chest wall and regional lymph nodes versus not after mastectomy and axillary sampling (Mast+AS):** 10-year risk of recurrence and type of first recurrence, by allocated treatment, in 2541 women with pathologically node-positive (pN+) disease. ( $r_L$  = number of women for whom first recurrence was locoregional,  $r_D$  = number women for whom distant recurrence was first.)

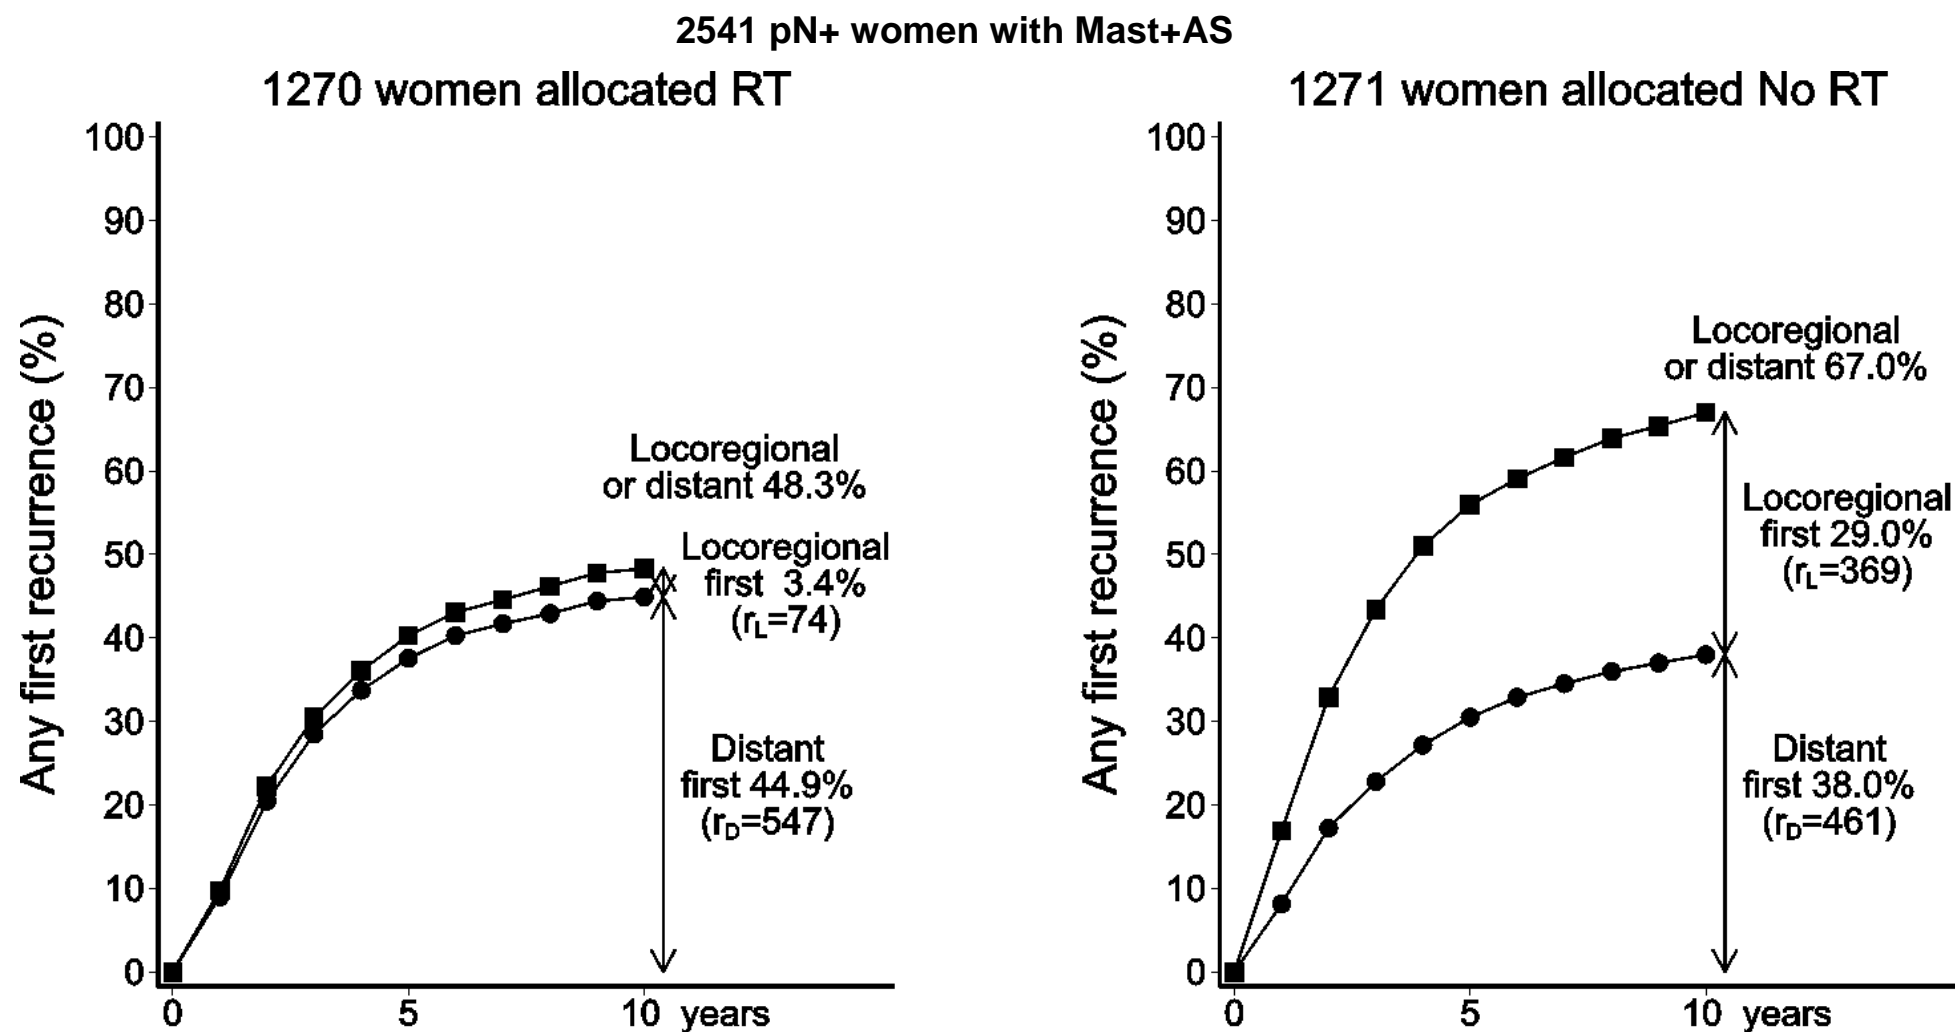

2p for difference between treatment arms in the proportion of all first recurrences that were locoregional: < 0.00001

**Webfigure 29. Effect of radiotherapy (RT) to the chest wall and regional lymph nodes versus not after mastectomy and axillary dissection (Mast+AD) or axillary sampling (Mast+AS):** Event rate ratios, one line per trial, for locoregional recurrence and recurrence of any type during years 0-9 and for breast cancer and all-cause mortality in 1594 women with pathologically node-negative (pN0) disease.

## 1594 pN0 women

### Locoregional recurrence first (years 0-9)

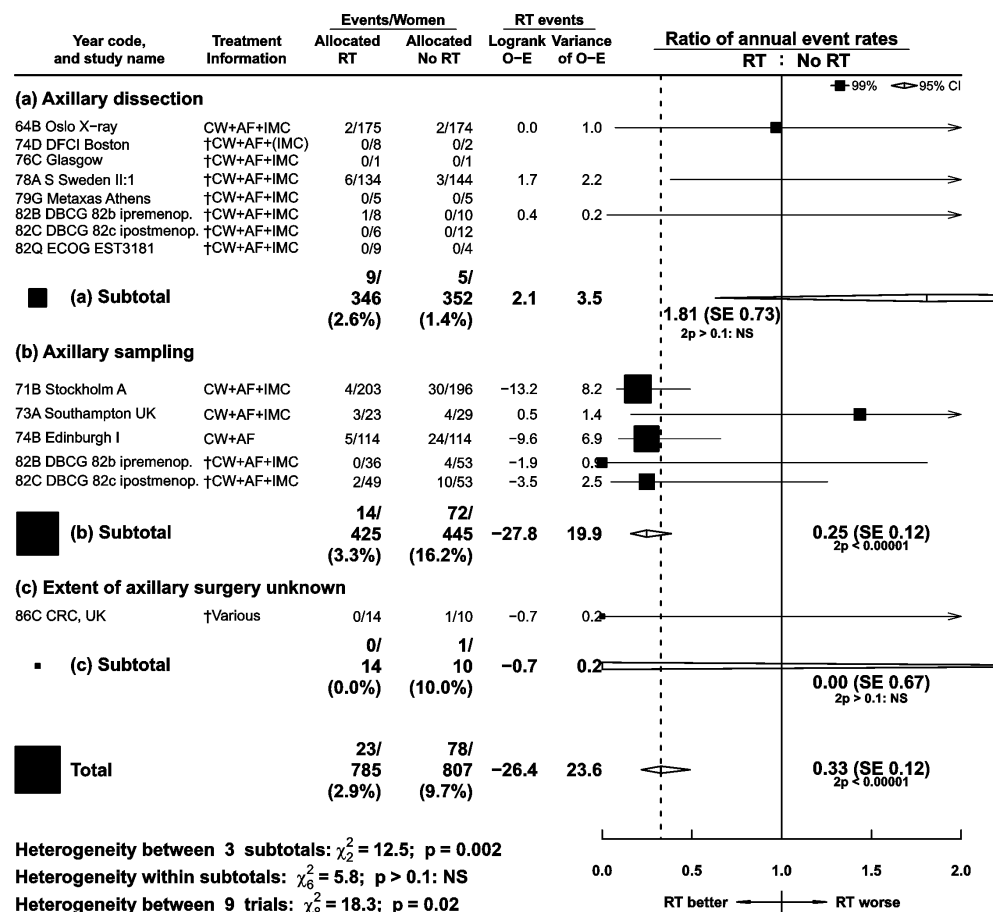

### Any first recurrence (years 0-9)

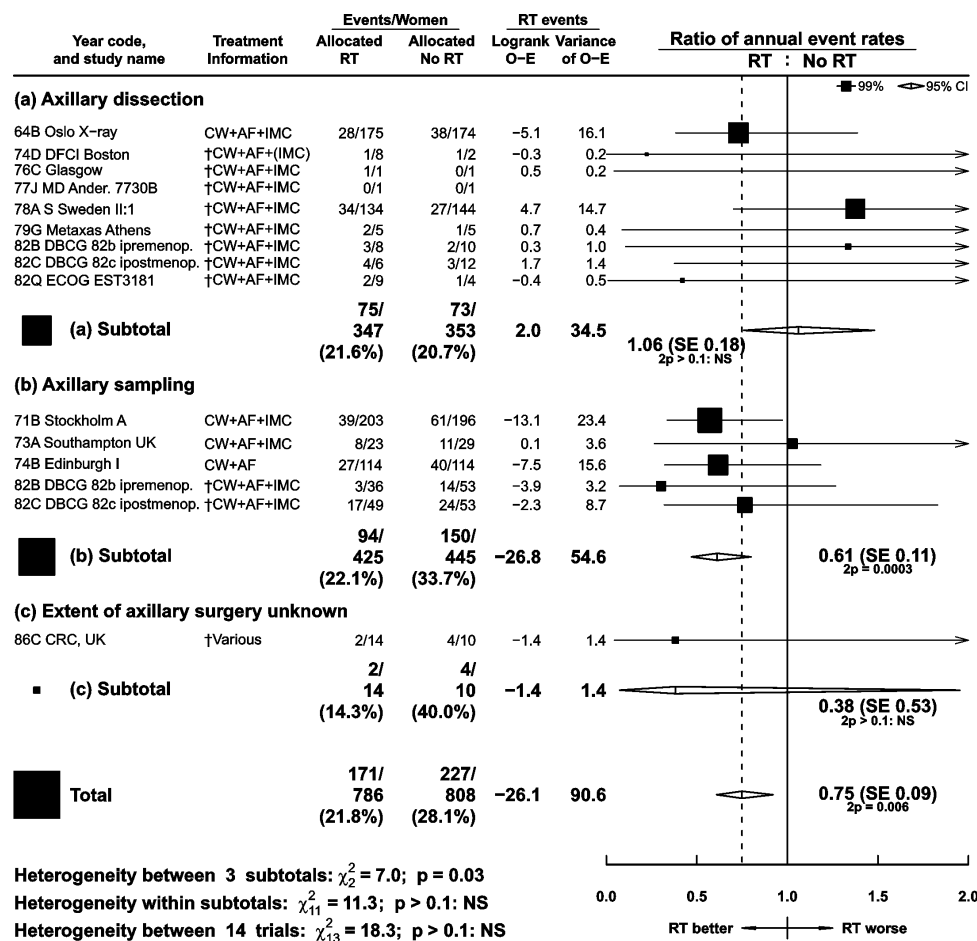

† Same polychemotherapy (usually cyclophosphamide, methotrexate, and 5-fluorouracil), and/or tamoxifen in both groups.  
Radiotherapy sites: CW=chest wall, AF=Axilla and/or supraclavicular fossa, IMC=Internal mammary chain. Site(s) in brackets were not always treated.

continued overleaf

Webfigure 29 cntd.

## 1594 pN0 women

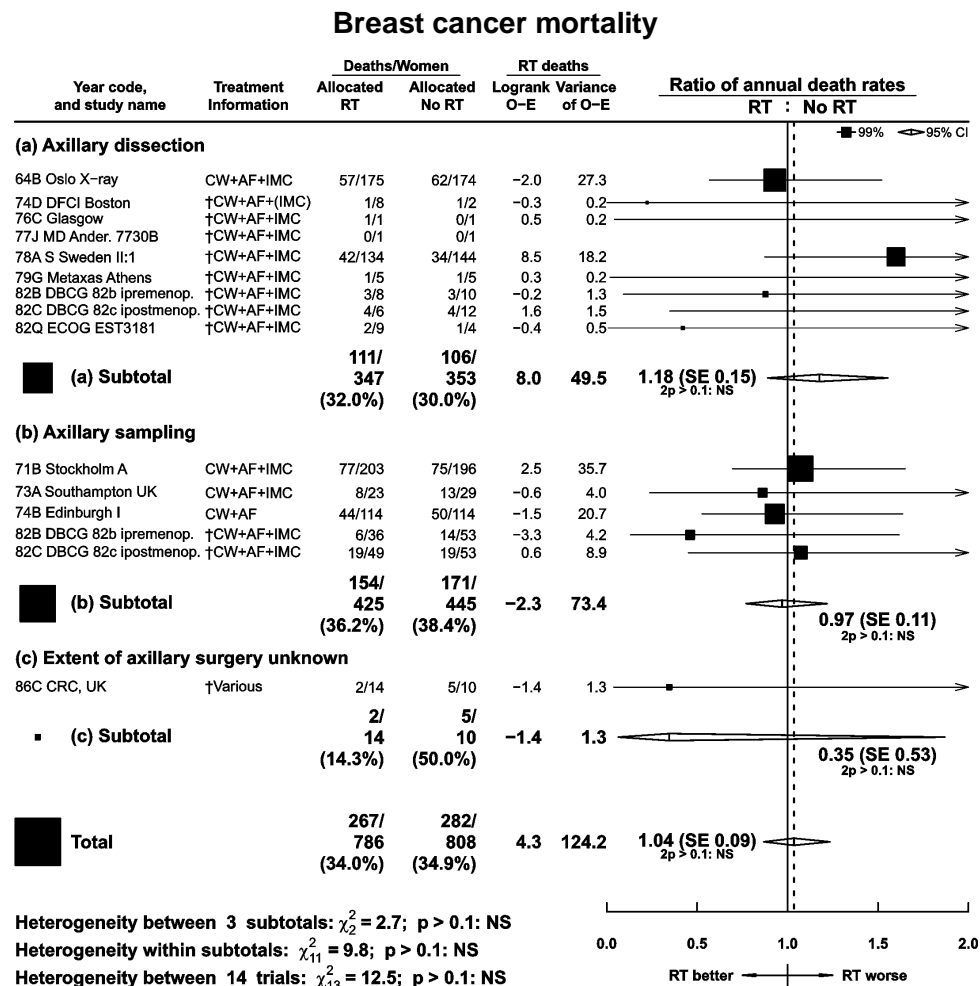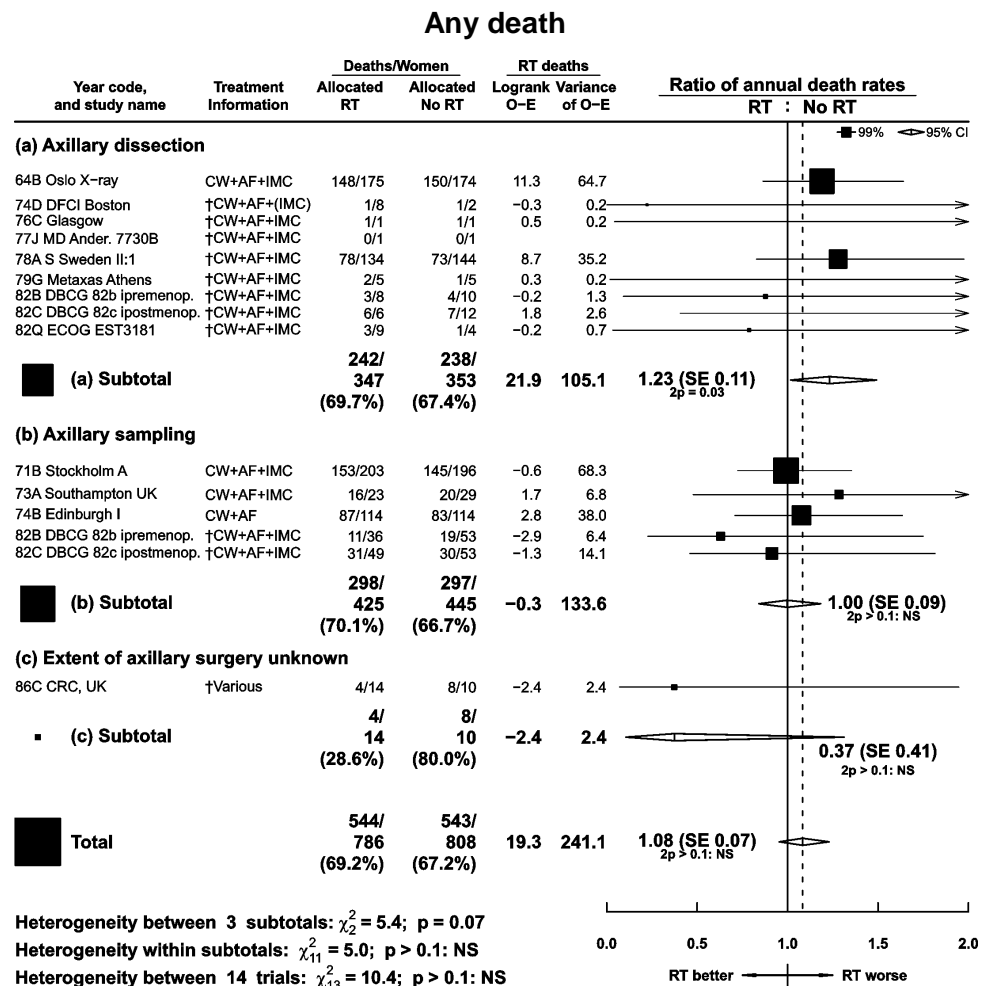

† Same polychemotherapy (usually cyclophosphamide, methotrexate, and 5-fluorouracil), and/or tamoxifen in both groups.  
Radiotherapy sites: CW=chest wall, AF=Axilla and/or supraclavicular fossa, IMC=Internal mammary chain. Site(s) in brackets were not always treated.

**Webfigure 30. Effect of radiotherapy (RT) to the chest wall and regional lymph nodes versus not after mastectomy and axillary dissection (Mast+AD) or axillary sampling (Mast+AS): Event rate ratios, one line per trial, for locoregional recurrence and recurrence of any type during years 0-9 and for breast cancer and all-cause mortality in 5821 women with pathologically node-positive (pN+) disease.**

**5821 pN+ women**

**Locoregional recurrence first (years 0-9)**

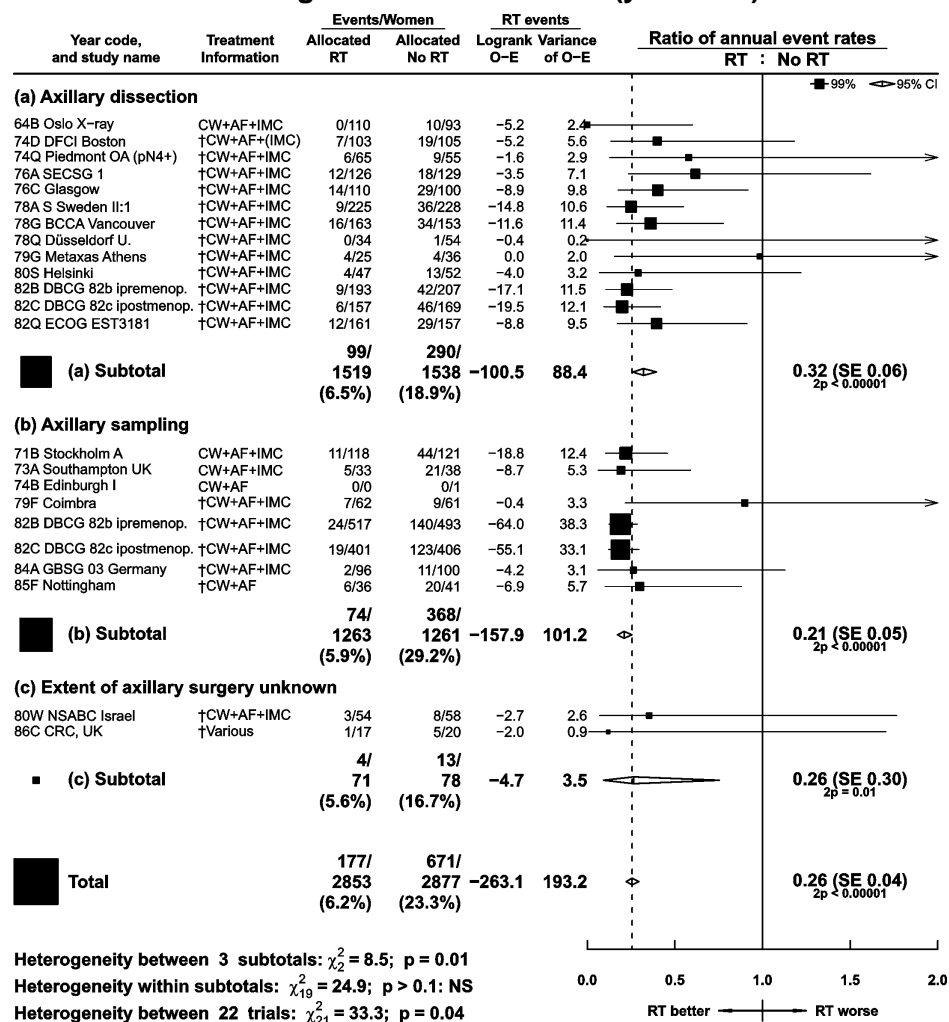

**Any first recurrence (years 0-9)**

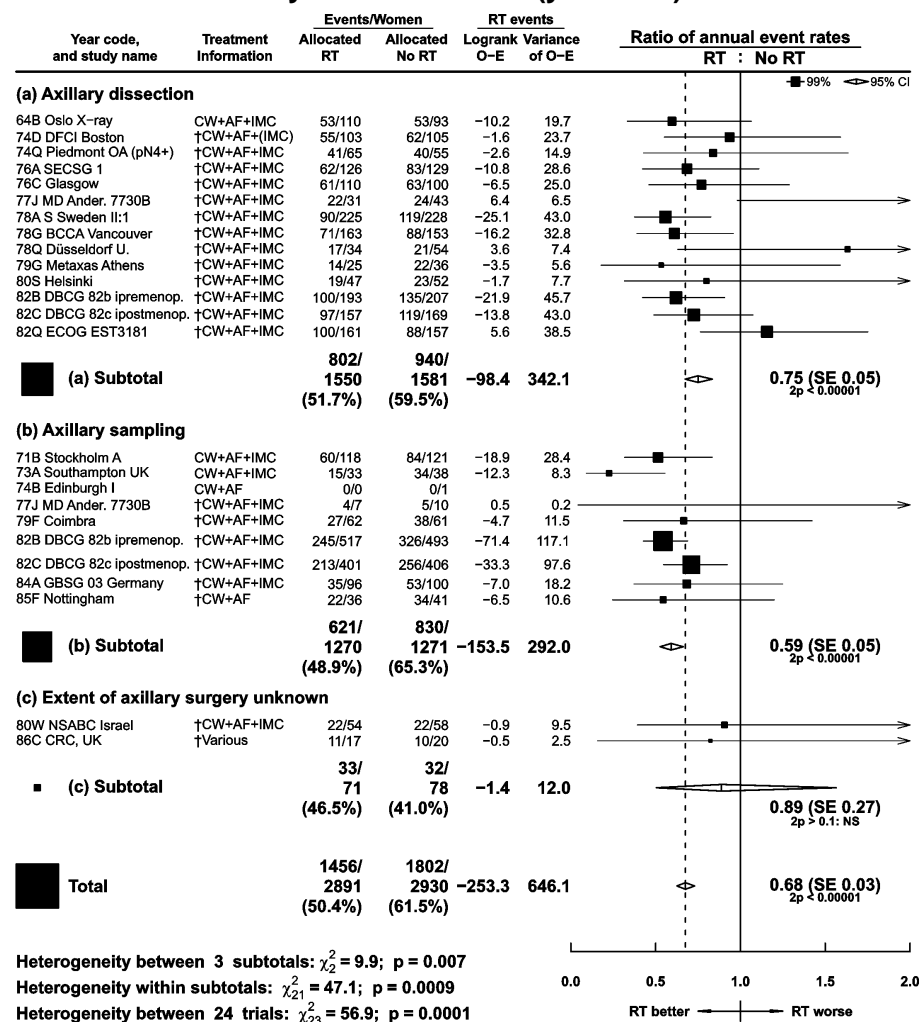

† Same polychemotherapy (usually cyclophosphamide, methotrexate, and 5-fluorouracil), and/or tamoxifen in both groups.

Radiotherapy sites: CW=chest wall, AF=Axilla and/or supraclavicular fossa, IMC=Internal mammary chain. Site(s) in brackets were not always treated.

continued overleaf

5821 pN+ women

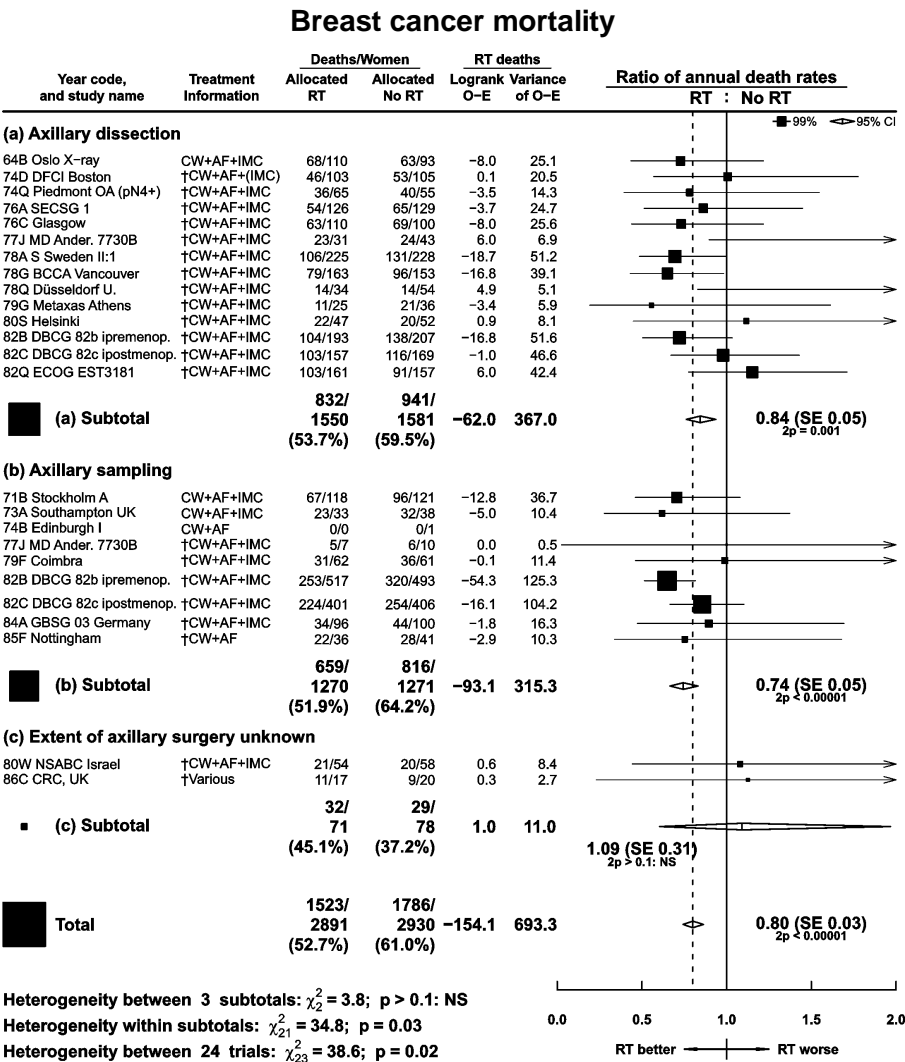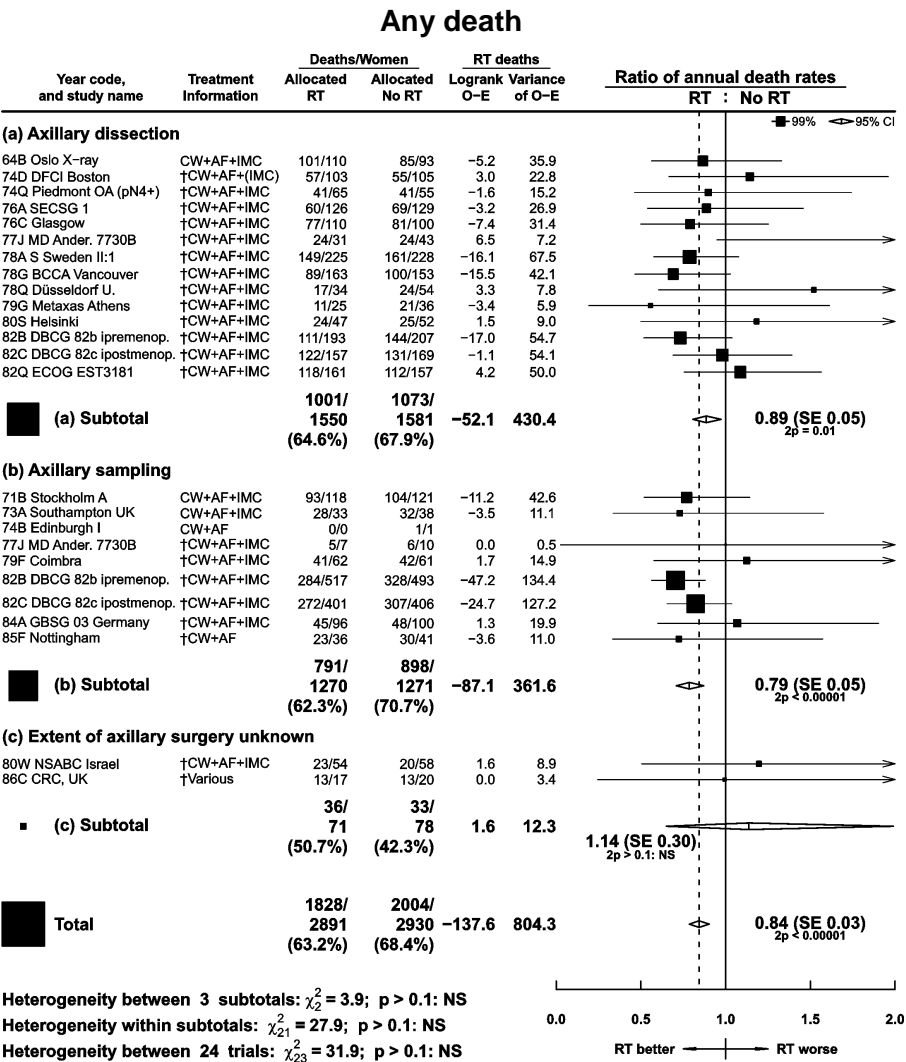

† Same polychemotherapy (usually cyclophosphamide, methotrexate, and 5-fluorouracil), and/or tamoxifen in both groups.  
Radiotherapy sites: CW=chest wall, AF=Axilla and/or supraclavicular fossa, IMC=Internal mammary chain. Site(s) in brackets were not always treated.

**Webfigure 31. Effect of radiotherapy (RT) to the chest wall and regional lymph nodes versus not after mastectomy and axillary dissection (Mast+AD) or axillary sampling (Mast+AS): Event rate ratios, one line per trial, for locoregional recurrence and recurrence of any type during years 0-9 and for breast cancer and all-cause mortality in 2801 women with 1-3 pathologically positive nodes (pN1-3).**

## 2801 pN1-3 women

### Locoregional recurrence first (years 0-9)

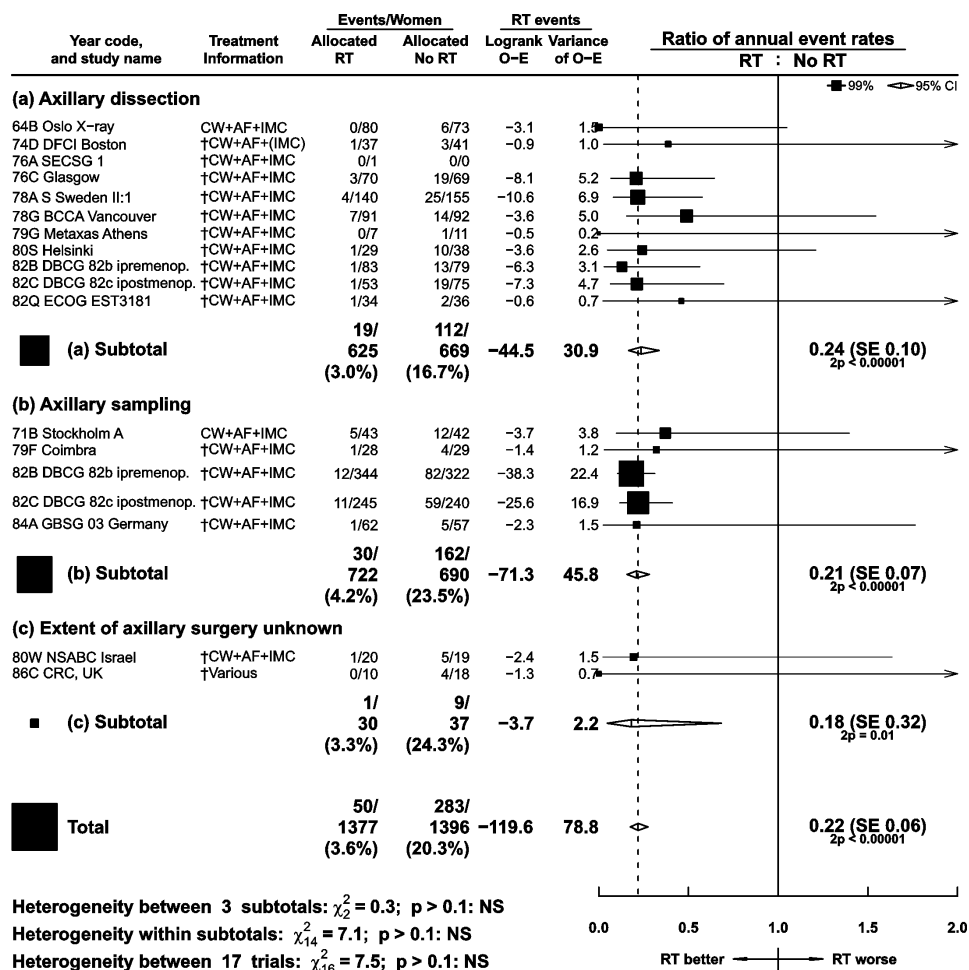

### Any first recurrence (years 0-9)

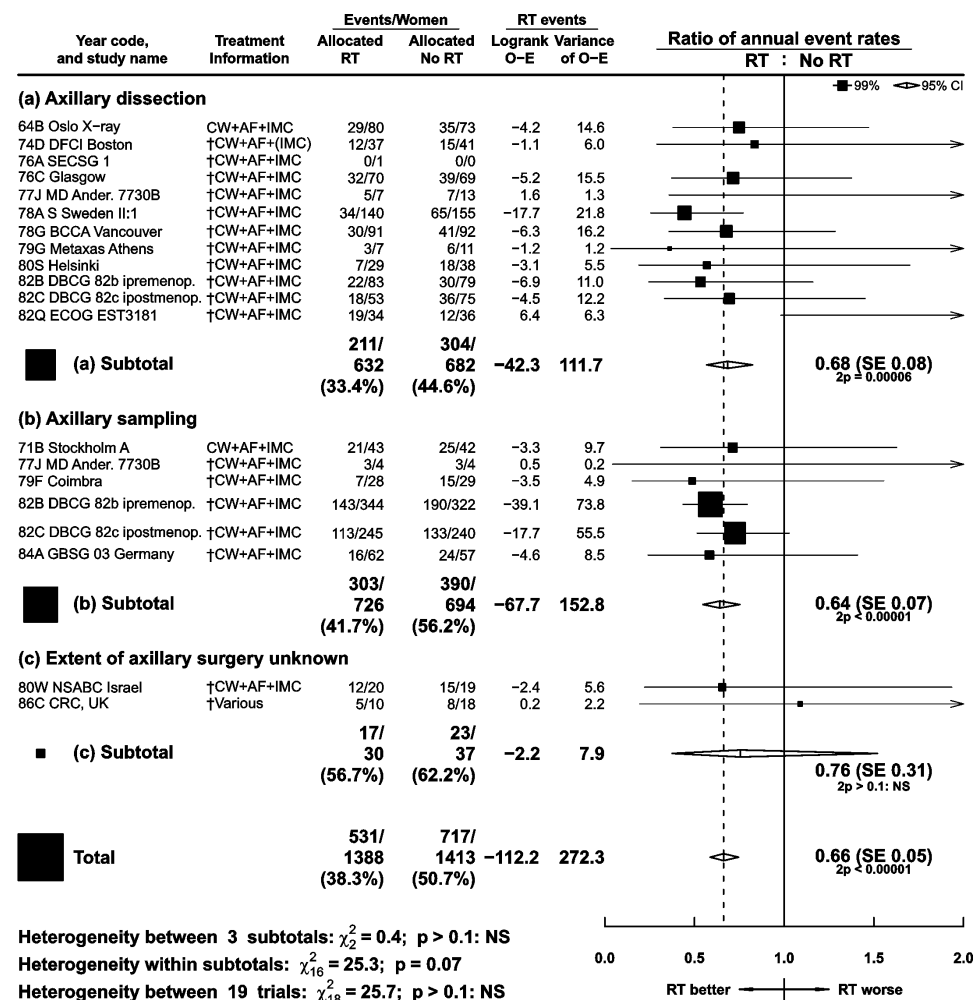

† Same polychemotherapy (usually cyclophosphamide, methotrexate, and 5-fluorouracil), and/or tamoxifen in both groups.  
Radiotherapy sites: CW=chest wall, AF=Axilla and/or supraclavicular fossa, IMC=Internal mammary chain. Site(s) in brackets were not always treated.

continued overleaf

2801 pN1-3 women

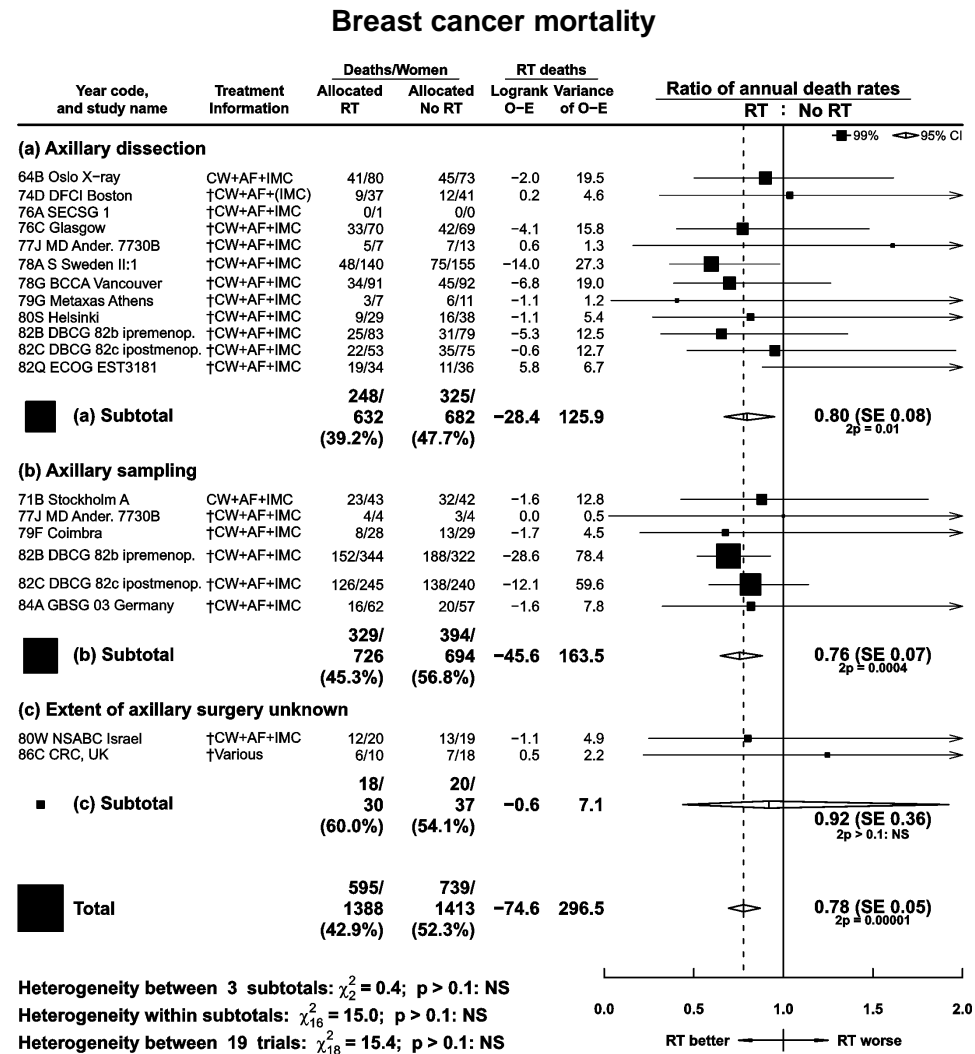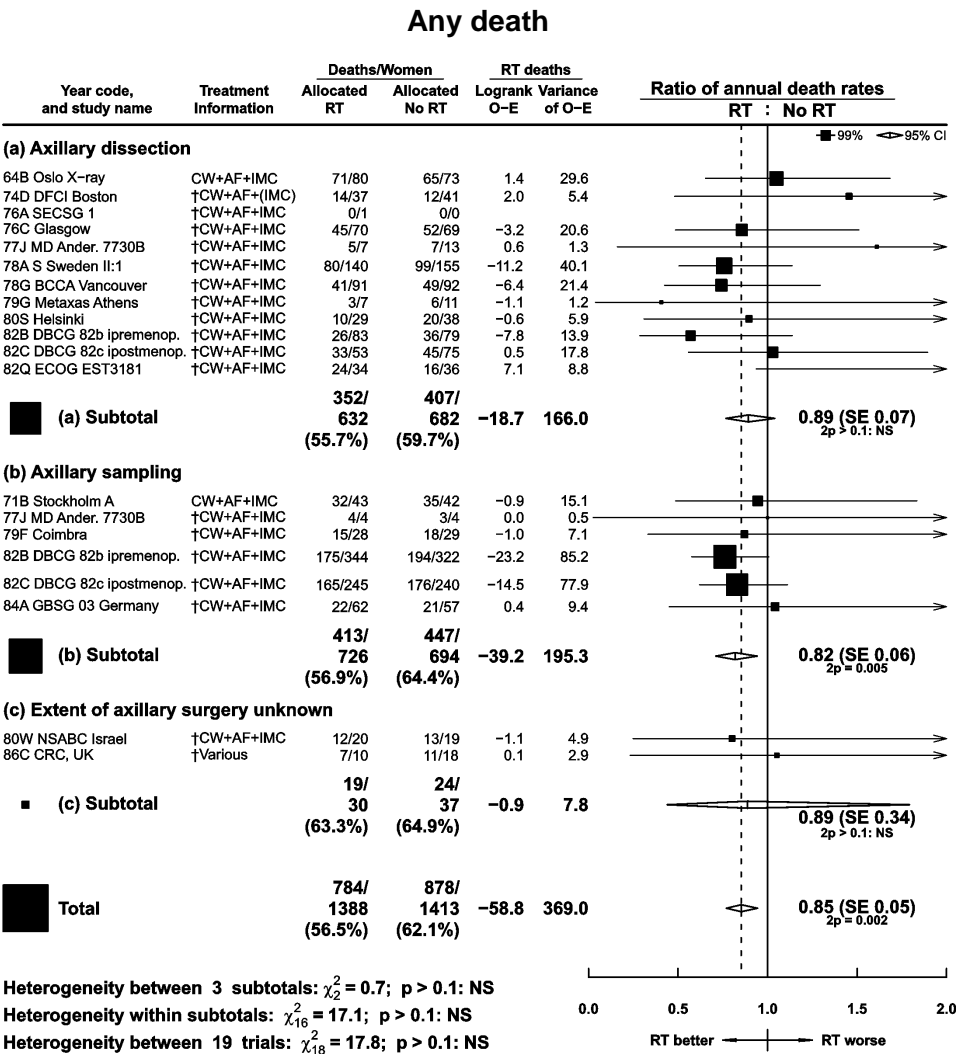

† Same polychemotherapy (usually cyclophosphamide, methotrexate, and 5-fluorouracil), and/or tamoxifen in both groups.  
Radiotherapy sites: CW=chest wall, AF=Axilla and/or supraclavicular fossa, IMC=Internal mammary chain. Site(s) in brackets were not always treated.

**Webfigure 32. Effect of radiotherapy (RT) to the chest wall and regional lymph nodes versus not after mastectomy and axillary dissection (Mast+AD) or axillary sampling (Mast+AS): Event rate ratios, one line per trial, for locoregional recurrence and recurrence of any type during years 0-9 and for breast cancer and all-cause mortality in 2557 women with 4+ pathologically positive nodes (pN4+).**

## 2557 pN4+ women

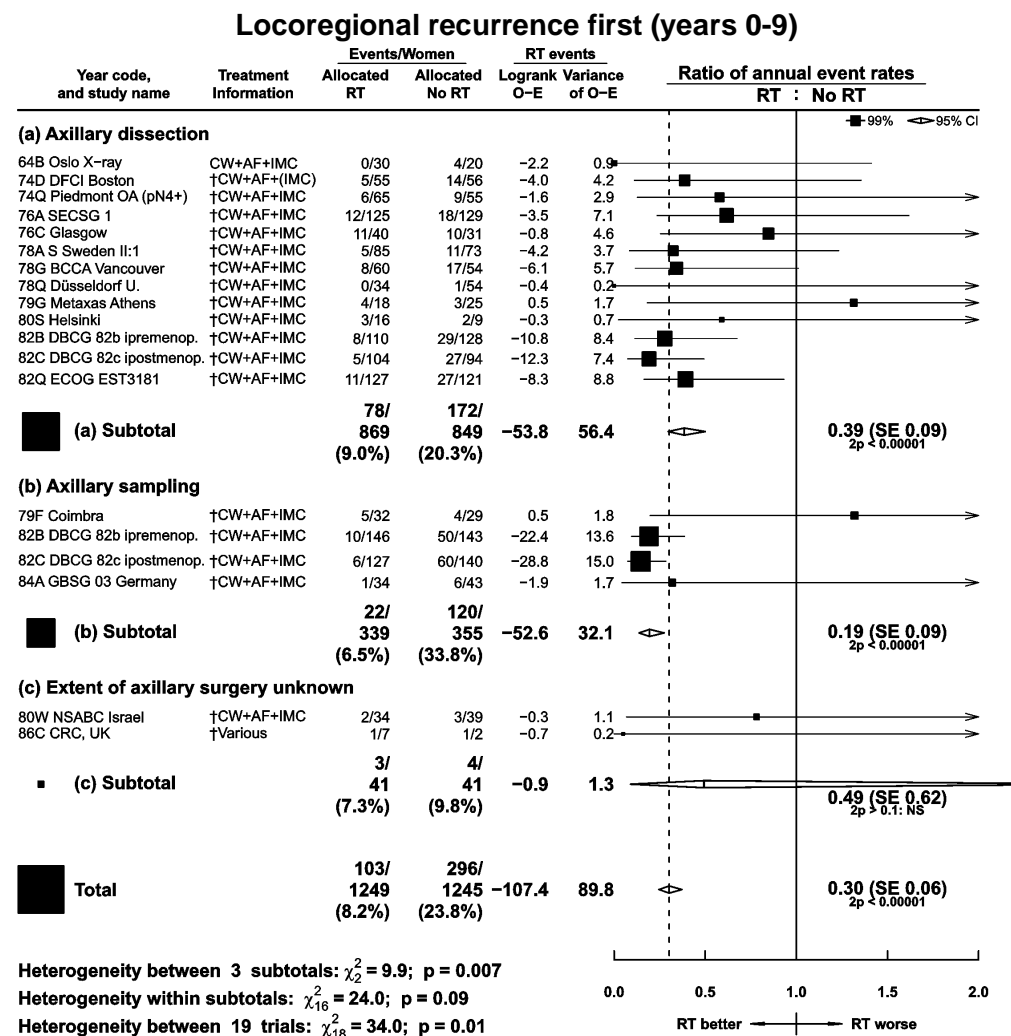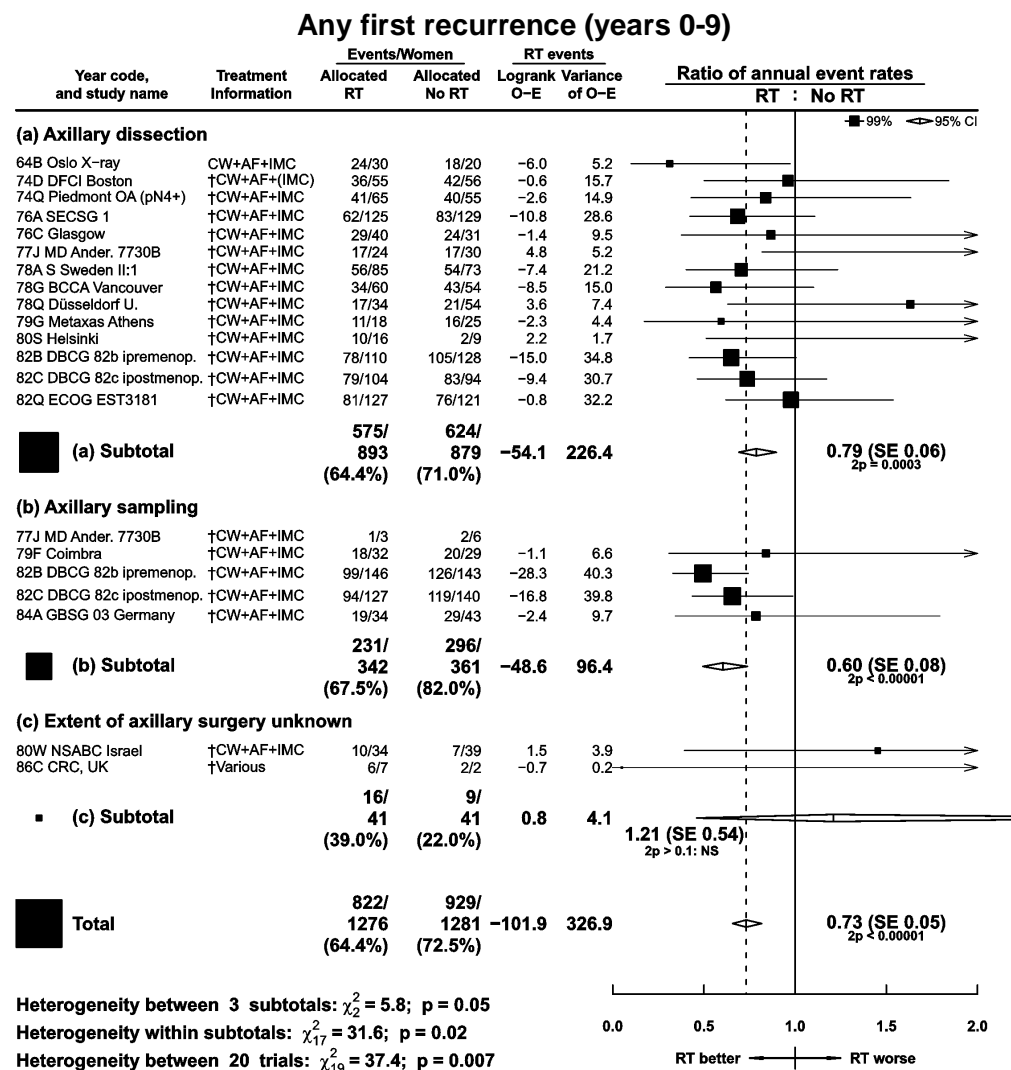

† Same polychemotherapy (usually cyclophosphamide, methotrexate, and 5-fluorouracil), and/or tamoxifen in both groups.  
Radiotherapy sites: CW=chest wall, AF=Axilla and/or supraclavicular fossa, IMC=Internal mammary chain. Site(s) in brackets were not always treated.

continued overleaf

## 2557 pN4+ women

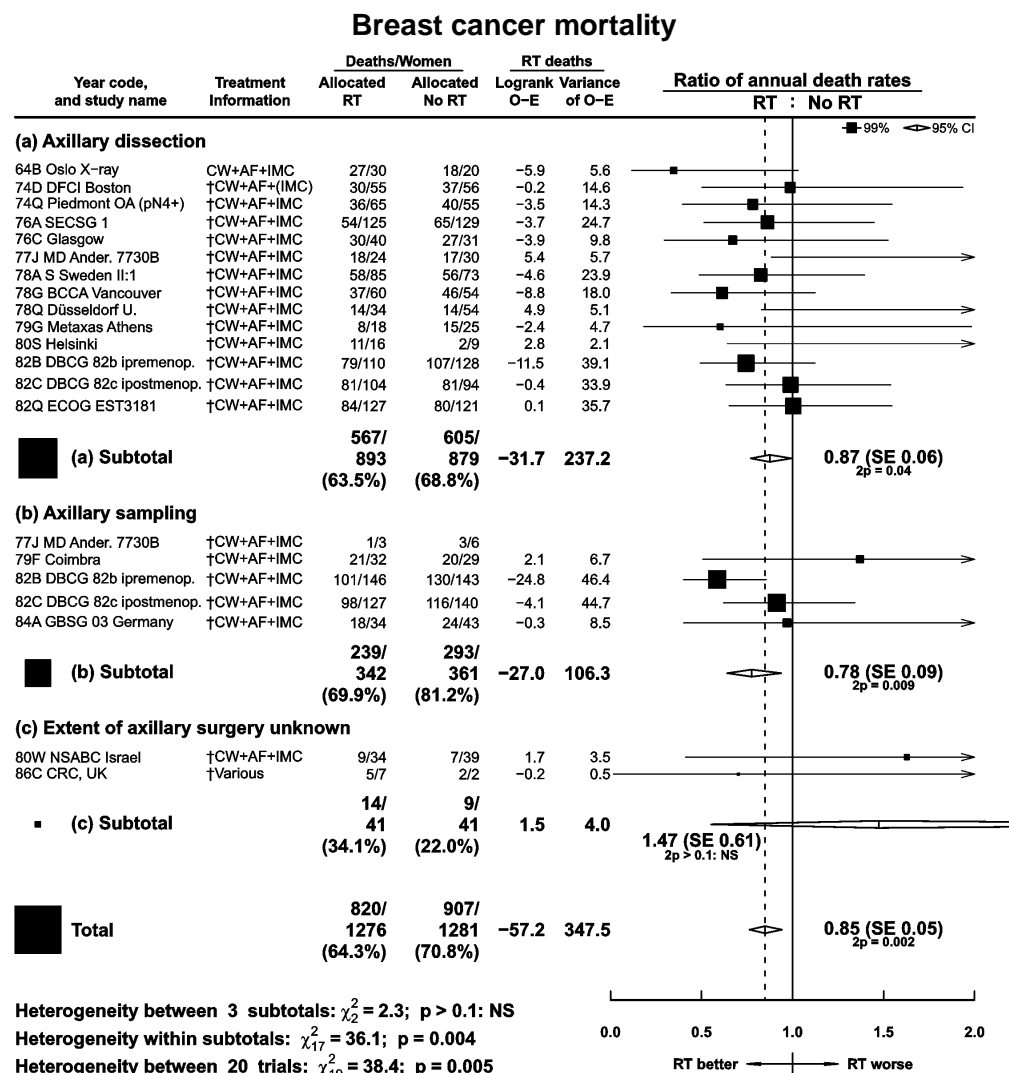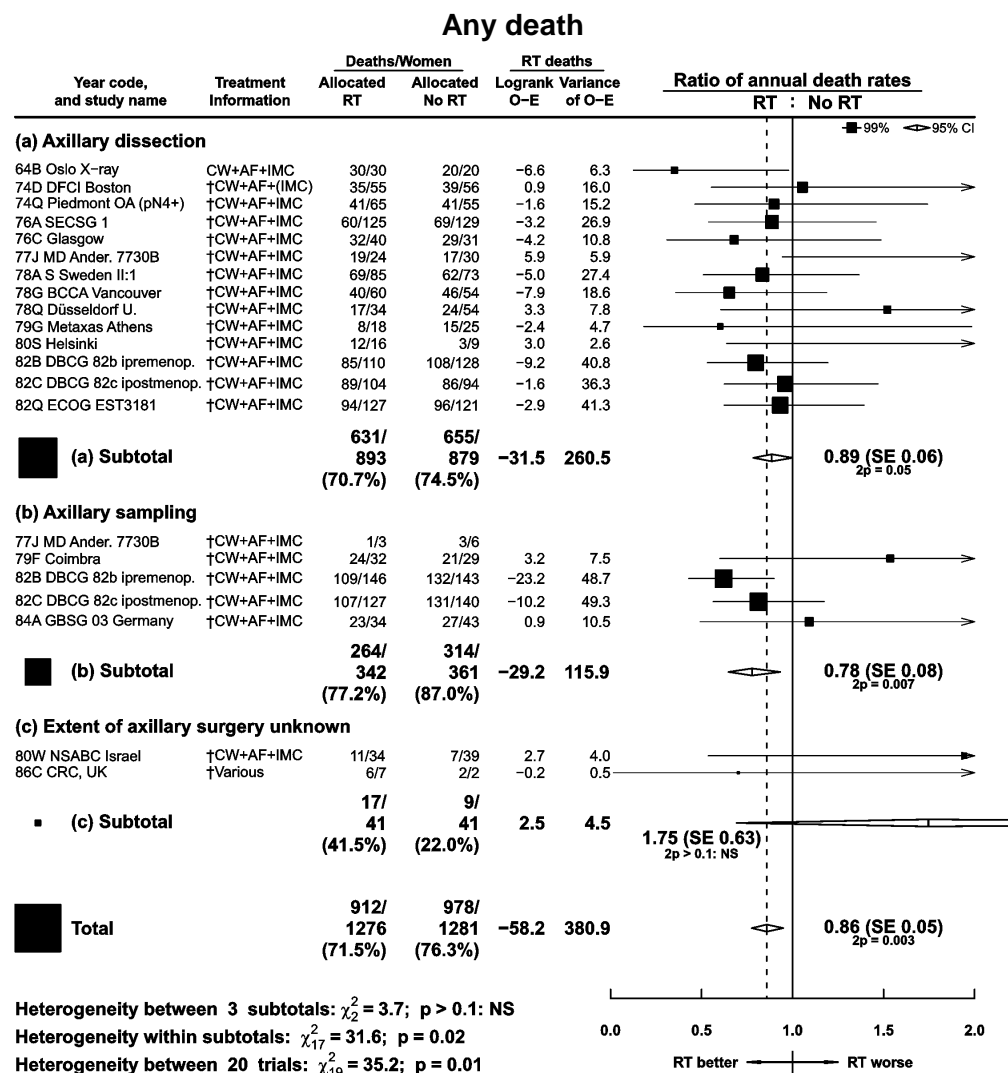

† Same polychemotherapy (usually cyclophosphamide, methotrexate, and 5-fluorouracil), and/or tamoxifen in both groups.  
Radiotherapy sites: CW=chest wall, AF=Axilla and/or supraclavicular fossa, IMC=Internal mammary chain. Site(s) in brackets were not always treated.

continued overleaf

**Webfigure 33. Effect of radiotherapy (RT) to the chest wall and regional lymph nodes versus not after mastectomy and axillary dissection (Mast+AD) or axillary sampling (Mast+AS):** Event rate ratios, one line per trial, for locoregional recurrence and recurrence of any type during years 0-9 and for breast cancer and all-cause mortality in 463 women with pathologically positive nodes (pN?+) but unknown if they were 1-3 or 4+ positive.

463 pN?+ women

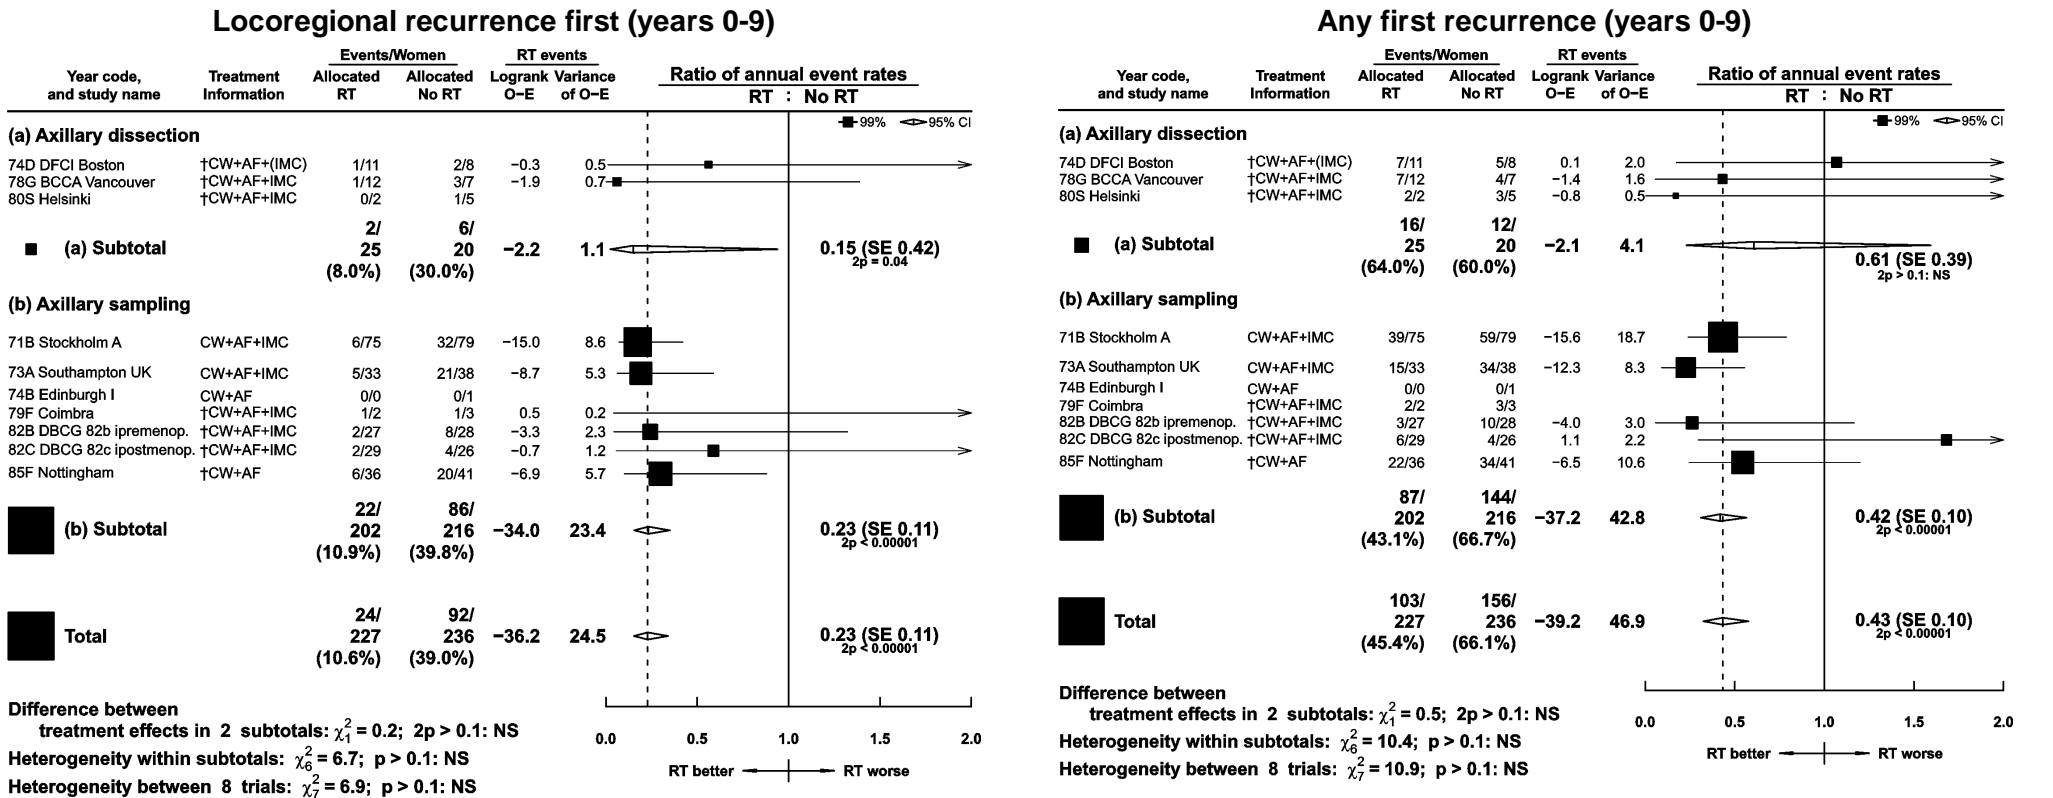

† Same polychemotherapy (usually cyclophosphamide, methotrexate, and 5-fluorouracil), and/or tamoxifen in both groups.  
Radiotherapy sites: CW=chest wall, AF=Axilla and/or supraclavicular fossa, IMC=Internal mammary chain. Site(s) in brackets were not always treated.

continued overleaf

463 pN?+ women

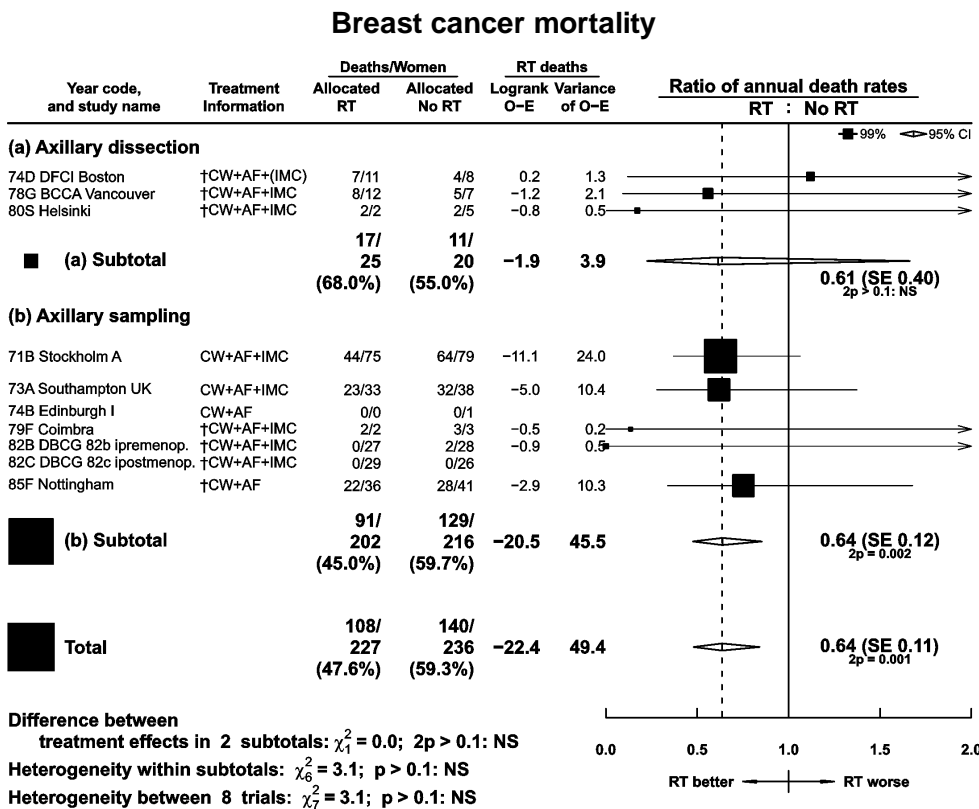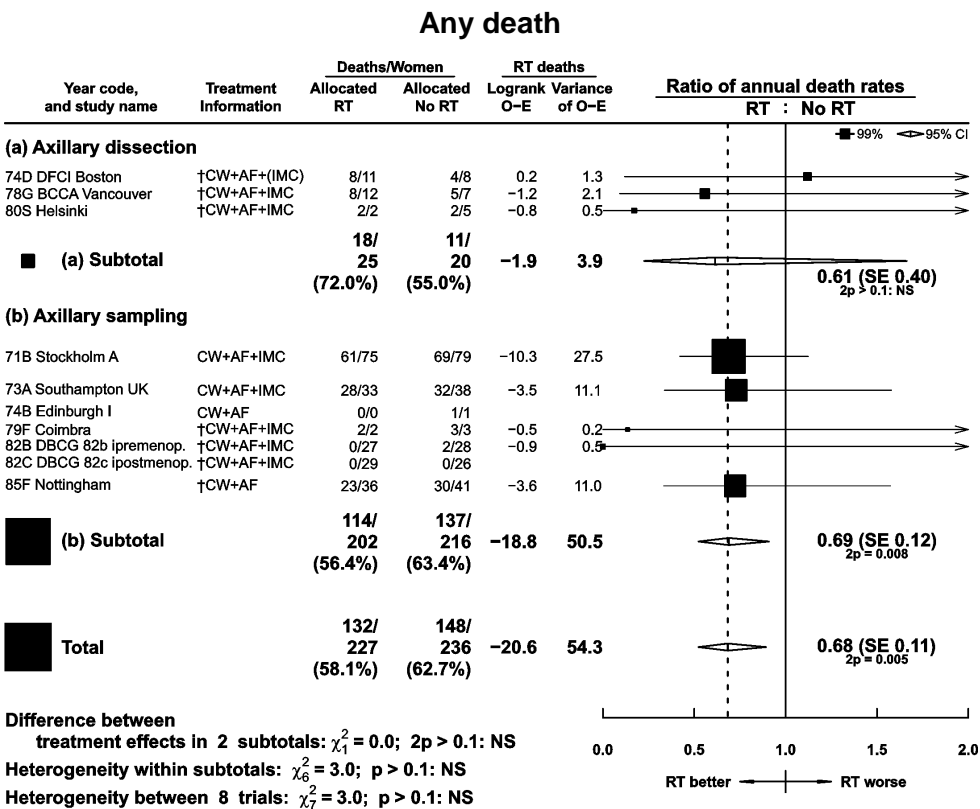

† Same polychemotherapy (usually cyclophosphamide, methotrexate, and 5-fluorouracil), and/or tamoxifen in both groups.  
Radiotherapy sites: CW=chest wall, AF=Axilla and/or supraclavicular fossa, IMC=Internal mammary chain. Site(s) in brackets were not always treated.

**Webfigure 34. Effect of radiotherapy (RT) to the chest wall and regional lymph nodes versus not after mastectomy and axillary dissection (Mast+AD) or axillary sampling (Mast+AS):** Event rate ratios, one line per trial, for locoregional recurrence and recurrence of any type during years 0-9 and for breast cancer and all-cause mortality in 720 women with unknown pathological nodal status (pN?).

## 720 pN? women

### Locoregional recurrence first (years 0-9)

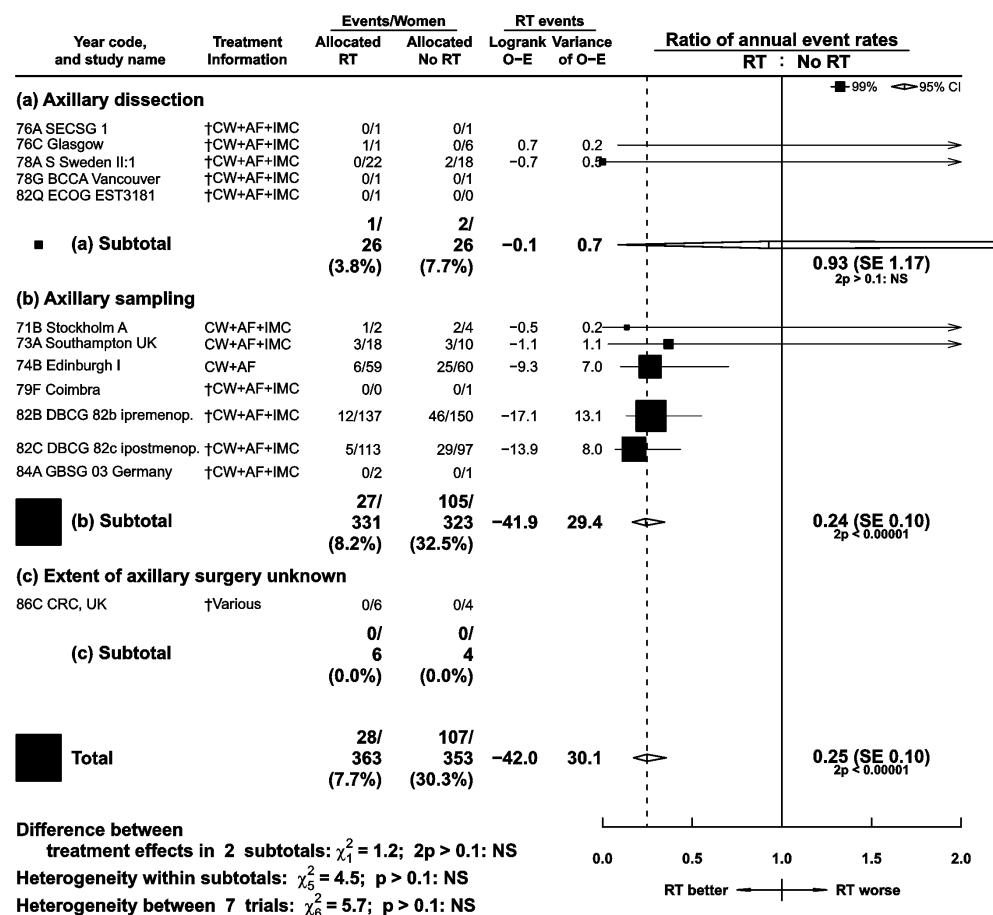

### Any first recurrence (years 0-9)

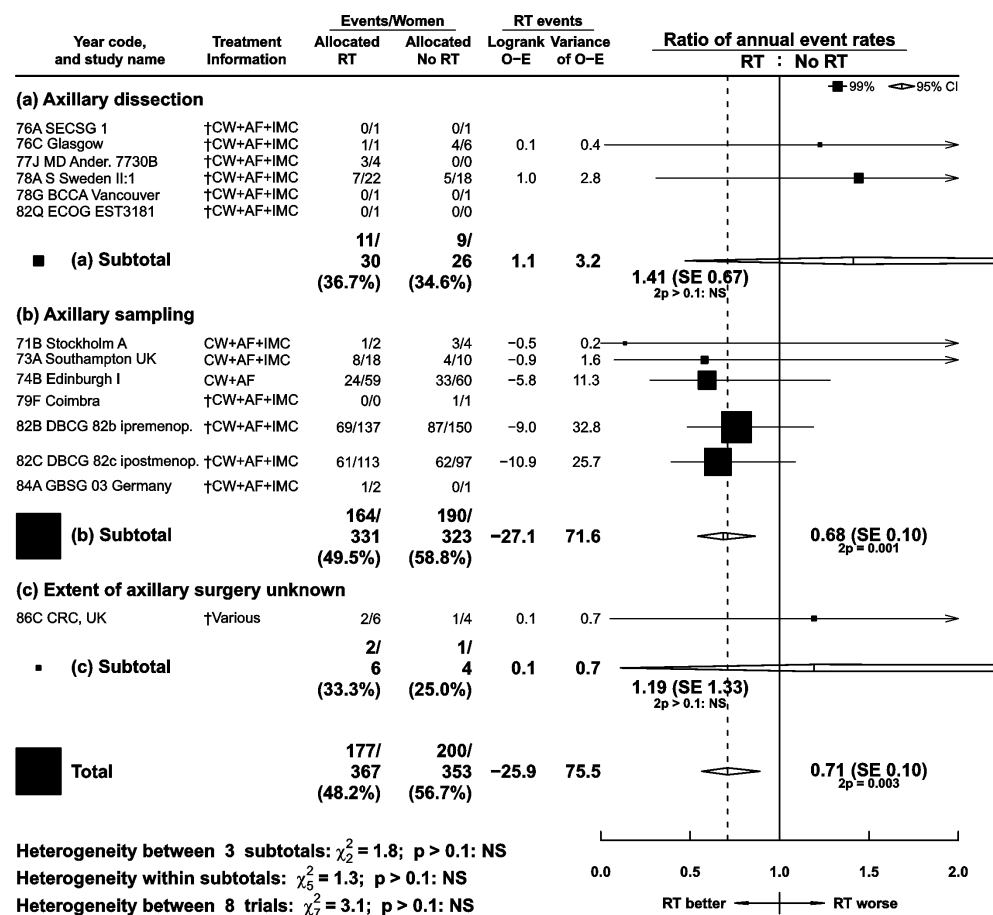

† Same polychemotherapy (usually cyclophosphamide, methotrexate, and 5-fluorouracil), and/or tamoxifen in both groups.  
 Radiotherapy sites: CW=chest wall, AF=Axilla and/or supraclavicular fossa, IMC=Internal mammary chain. Site(s) in brackets were not always treated.

continued overleaf

## 720 pN? women

## Breast cancer mortality

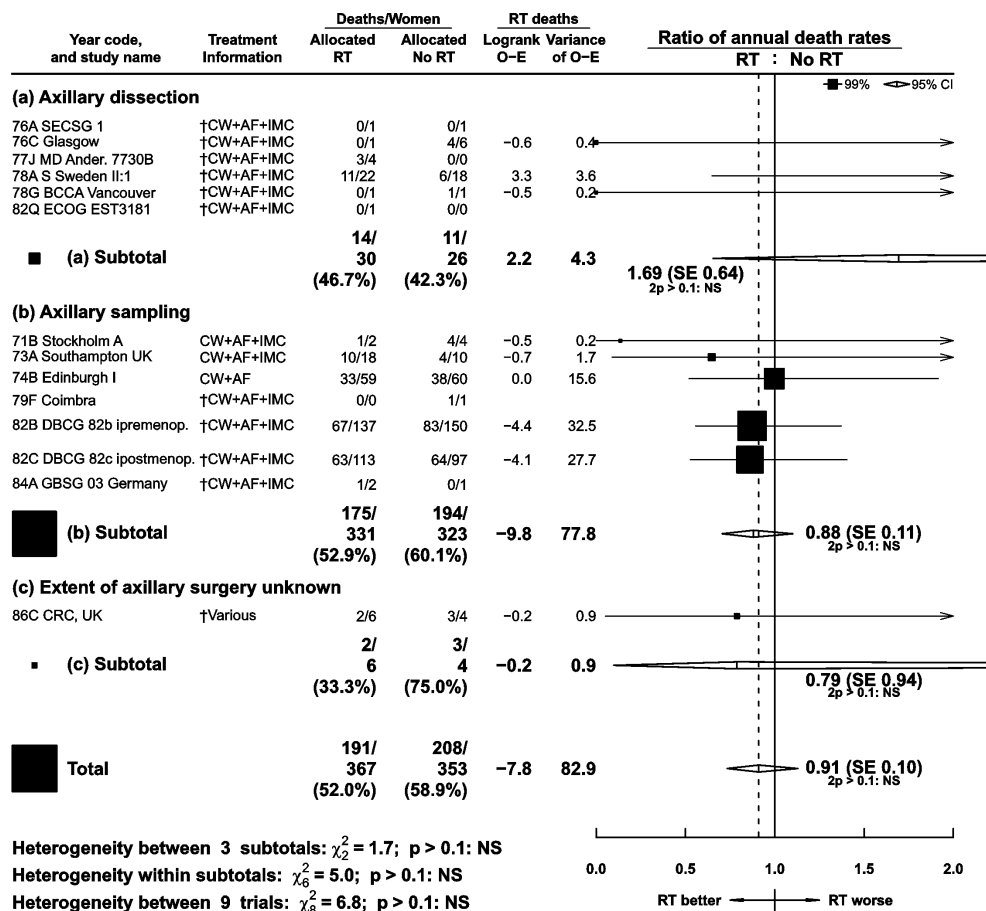

## Any death

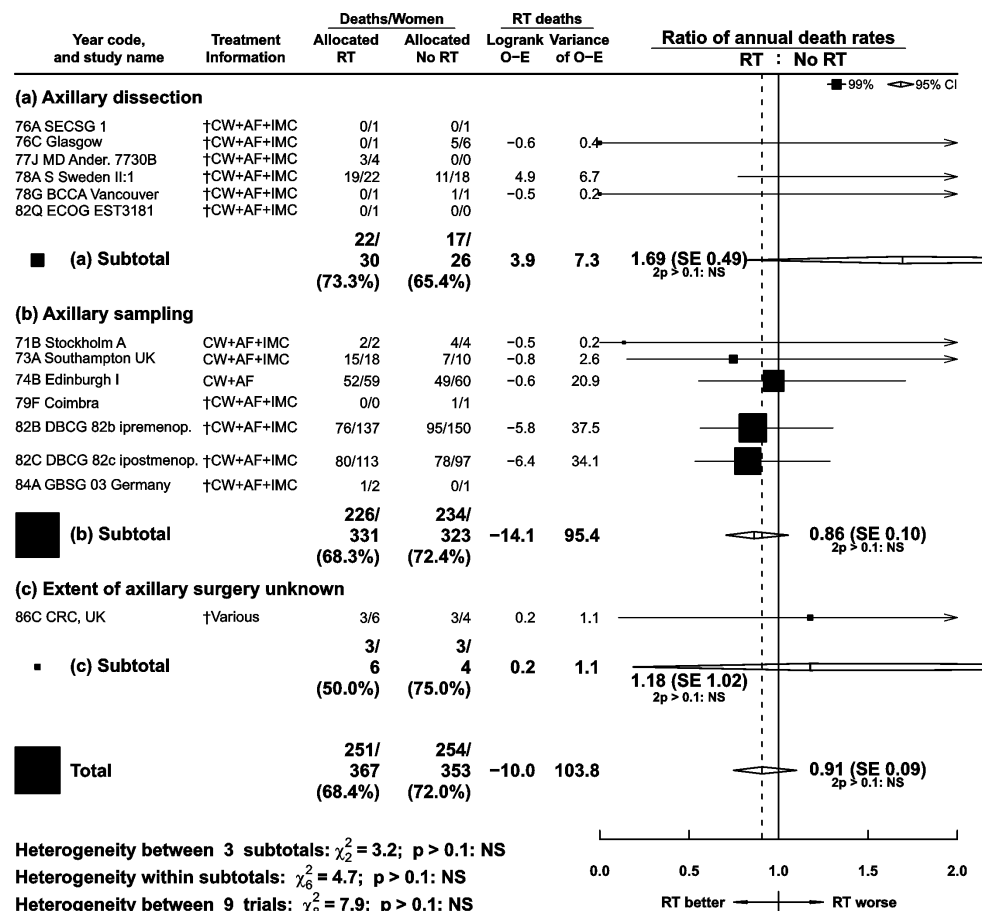

† Same polychemotherapy (usually cyclophosphamide, methotrexate, and 5-fluorouracil), and/or tamoxifen in both groups.  
Radiotherapy sites: CW=chest wall, AF=Axilla and/or supraclavicular fossa, IMC=Internal mammary chain. Site(s) in brackets were not always treated.

**Webtable 2. Availability of data from randomised trials beginning before the year 2000 and comparing radiotherapy to the regional lymph nodes alone versus not after mastectomy and axillary dissection (Mast+AD) or axillary sampling (Mast+AS)\*.**

| Nodal status†       | Women | Deaths | Woman-years since diagnosis |                  |                               |     |     | % women given systemic therapy |                    |
|---------------------|-------|--------|-----------------------------|------------------|-------------------------------|-----|-----|--------------------------------|--------------------|
|                     |       |        | Median/<br>woman            | Total<br>('000s) | Distribution by years ('000s) |     |     | Chemotherapy‡                  | ER+ &<br>Tamoxifen |
|                     |       |        |                             |                  | <10                           | 10- | 20+ |                                |                    |
| Axillary dissection |       |        |                             |                  |                               |     |     |                                |                    |
| pN0                 | 465   | 355    | 17.3                        | 8.0              | 3.9                           | 2.6 | 1.5 | 3                              | 0                  |
| pN+                 | 1029  | 678    | 6.5                         | 10.1             | 6.6                           | 2.4 | 1.1 | 39                             | 0                  |
| pN unknown          | 810   | 499    | 5.6                         | 6.4              | 4.7                           | 1.5 | 0.2 | 2                              | 0                  |
| Total               | 2304  | 1532   | 7.2                         | 24.5             | 15.2                          | 6.5 | 2.8 | 19                             | 0                  |

\*Data available for 8 trials, start dates 1961 to 1978. In all trials radiotherapy was given to the axilla/supraclavicular fossa and the internal mammary chain. In 3 of the 8 trials radiotherapy to the chest wall was occasionally given. Full details of the trials are given in webtable 3.

† pN0: pathologically node negative, pN+: pathologically node positive, pN unknown: status not reported or staging method was clinical or unknown.

‡ Chemotherapy was cyclophosphamide, methotrexate, 5-fluorouracil [CMF], cyclophosphamide, 5-fluorouracil, prednisone [CFP], or melphalan.

**Webtable 3. Randomised trials beginning before the year 2000 and comparing radiotherapy to the regional lymph nodes alone versus not after mastectomy and axillary dissection (Mast+AD) or axillary sampling (Mast+AS) – treatment details.**

| Year code and study name    | Breast surgery | Axillary Surgery* (number of patients) | Chest wall RT                                      | Supraclavicular and axillary fossa RT | Internal mammary chain RT      | Boost RT to scar | Common systemic chemoendocrine therapy |
|-----------------------------|----------------|----------------------------------------|----------------------------------------------------|---------------------------------------|--------------------------------|------------------|----------------------------------------|
| 61H NSABP B-03              | RM             | Axillary dissection (748)              | None                                               | 35-45 Gy (1.8-2.3 Gy/f) o or c        | 35-45 Gy (1.8-2.3 Gy/f) o or c | None             | None                                   |
| 64E Oslo Co-60              | RM             | Axillary dissection (563)              | None                                               | 50 Gy de (2.5 Gy/f) c                 | 50 Gy de (2.5 Gy/f) c          | None             | Ovarian irradiation                    |
| 69A Heidelberg XRT          | MRM            | Axillary dissection (143)              | None                                               | 65 Gy (2.2-2.7 Gy/f) c                | 65 Gy (2.2-2.7 Gy/f) c         | None             | None                                   |
| 71D SASIB                   | MRM, RM        | Axillary dissection (377)              | None for over half, others 45 Gy (4.5 Gy/f) o or c | 45-60 Gy (2-4.5 Gy/f) c               | 40-60 Gy (2-4 Gy/f) c or e     | None             | None                                   |
| 73C Mayo 70-56-32           | MRM, RM        | Axillary dissection (241)              | None or if skin involvement 50 Gy (2.1 Gy/f) m     | 50 Gy de (2.1 Gy/f) m                 | 50 Gy de (2.1 Gy/f) m          | None             | CFP or not                             |
| 73E INT Milan 1             | RM             | Axillary dissection (22)               | None                                               | 40-45 Gy (1.8-2 Gy/f) c or m          | 40-45 Gy (1.8-2 Gy/f) c or m   | None             | None^                                  |
| 74Q Piedmont OA (excl pN4+) | MRM or RM      | Axillary dissection (160)              | None                                               | 45 Gy (1.5-2.8 Gy/f) u                | 45 Gy (1.5-2.8 Gy/f) u         | None             | Mel or CMF                             |
| 78B Toronto-Edmont          | MRM            | Axillary dissection (50)               | None                                               | 40 Gy de (2.5 Gy/f) c                 | 40 Gy de (2.5 Gy/f) c          | None             | CMF+ovarian irradiation+P±bCG          |

\* Based on the description of axillary surgery in the trial protocol or publications or on information on individual women. Women were classified as having axillary dissection if they were in a trial where the protocol required removal of axillary lymph nodes in at least Levels I & II or, if individual information was available, resection of ≥10 nodes. In other trials, women were classified as having axillary dissection if the trial publication indicated that the median number of nodes removed was ≥ 10. bCG=bacillus Calmette-Guérin, C=cyclophosphamide, c=cobalt-60, de=dose at depth (of nodes), F=fluorouracil, f=fraction, Gy=Gray (intended dose), m=megavoltage, M=methotrexate, Mel=melphalan, RM=modified radical mastectomy, NS=surgery not specified in detail (Patey mastectomy, or modified radical mastectomy), o=orthovoltage, P=prednisone, Patey=Patey mastectomy, RM=radical mastectomy (Halsted), RT=radiotherapy, u=unknown, ^After 1976 all patients in this trial with positive nodes received CMF chemotherapy.

### References for Webtable 3

| Year code and study name | Reference                                                                                                                                                                                                                                                                                                                       |
|--------------------------|---------------------------------------------------------------------------------------------------------------------------------------------------------------------------------------------------------------------------------------------------------------------------------------------------------------------------------|
| 61H NSABP B-03           | Fisher B, Slack NH, Cavanaugh PJ, Gardner B, Ravdin RG. Postoperative radiotherapy in the treatment of breast cancer: results of the NSABP clinical trial. <i>Ann Surg</i> 1970; <b>172</b> : 711–32.                                                                                                                           |
| 64E Oslo Co-60           | Host H, Brennhovd IO, Loeb M. Postoperative radiotherapy in breast cancer-long-term results from the Oslo study. <i>Int J Radiat Oncol Biol Phys</i> 1986; <b>12</b> : 727–32.                                                                                                                                                  |
| 69A Heidelberg XRT       | Friedl W, Scheurlen, H.R., Amberger, H., Henningsen, B. Radiotherapy in operable breast cancer- 10 year results of a prospective randomized trial. <i>J Exp Clin Cancer Res</i> 1984; <b>3</b> : 71–7.                                                                                                                          |
| 71D SASIB                | Personal Correspondence from Dr A Hacking                                                                                                                                                                                                                                                                                       |
| 73C Mayo 70-56-32        | Ahmann DL, O'Fallon JR, Scanlon PW, Payne WS, Bisel HF, Edmonson JH, et al. A preliminary assessment of factors associated with recurrent disease in a surgical adjuvant clinical trial for patients with breast cancer with special emphasis on the aggressiveness of therapy. <i>Am J Clin Oncol</i> 1982; <b>5</b> : 371–81. |
| 73E INT Milan 1          | Veronesi U, Cascinelli N, Mariani L, Greco M, Saccozzi R, Luini A, et al. Twenty-year follow-up of a randomized study comparing breast-conserving surgery with radical mastectomy for early breast cancer. <i>N Engl J Med</i> 2002; <b>347</b> : 1227–32.                                                                      |
| 74Q Piedmont OA          | Muss HB, Cooper MR, Brockschmidt JK, Ferree C, Richards F, 2nd, White DR, et al. A randomized trial of chemotherapy (L-PAM vs CMF) and irradiation for node positive breast cancer. Eleven year follow-up of a Piedmont Oncology Association trial. <i>Breast Cancer Res Treat</i> 1991; <b>19</b> : 77–84.                     |
| 78B Toronto-Edmont       | Personal Correspondence from Dr K Pritchard                                                                                                                                                                                                                                                                                     |

**Webfigure 35. Effect of radiotherapy (RT) to the regional lymph nodes alone versus not after mastectomy and axillary dissection (Mast+AD): 10-year risk of locoregional recurrence and recurrence of any type and 20-year risk of breast cancer and all-cause mortality in 465 women with pathologically node-negative (pN0) disease.** See webfigure 1 for methodological note and also webfigure 36.

## 465 pN0 women with Mast+AD

### Locoregional recurrence first

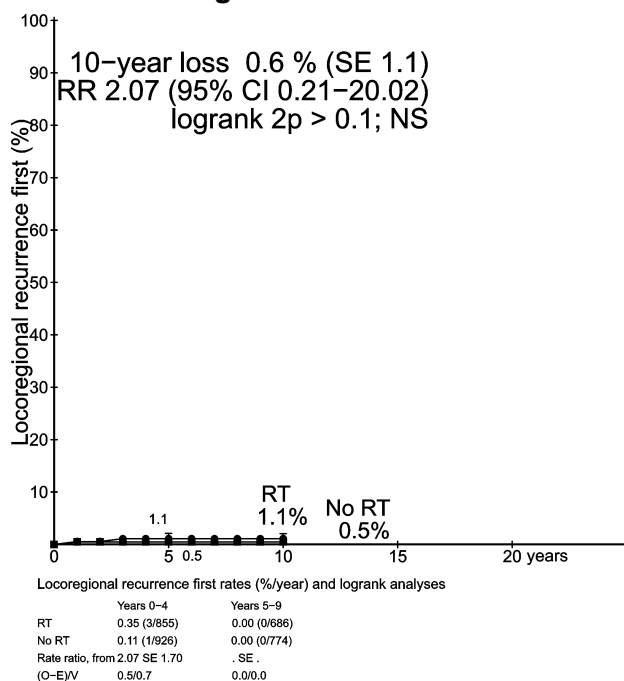

### Any first recurrence

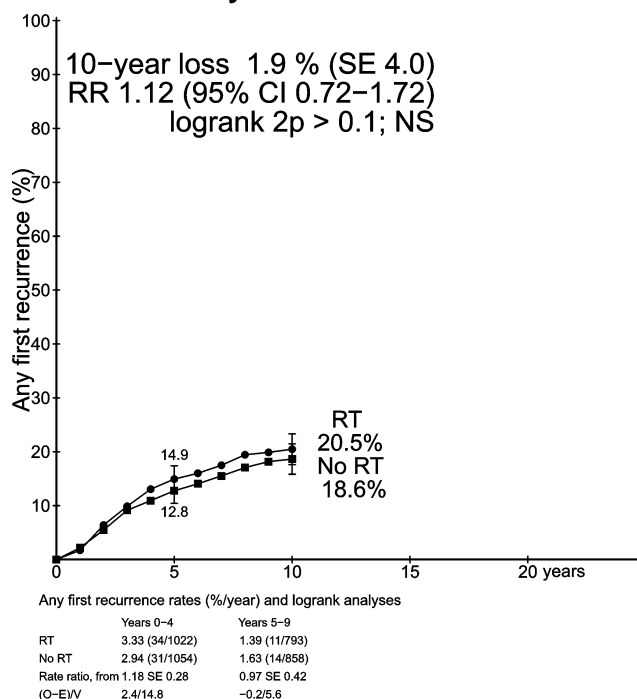

### Breast cancer mortality

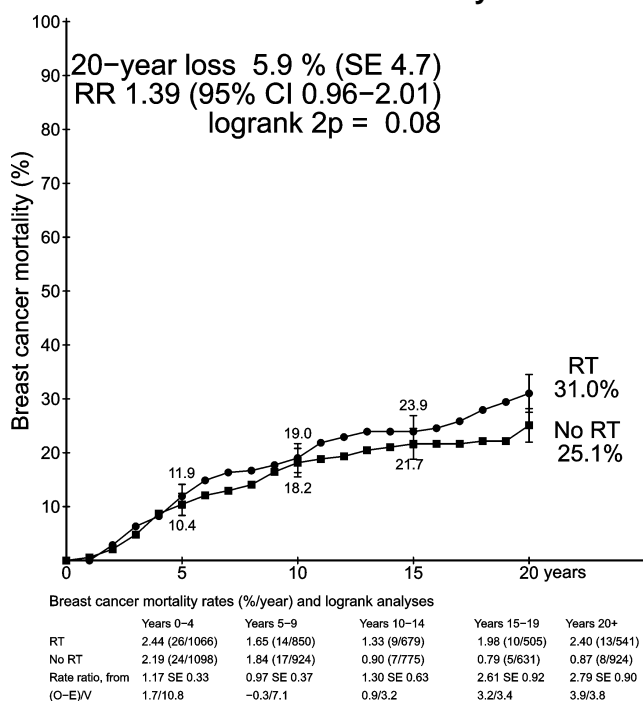

### Any death

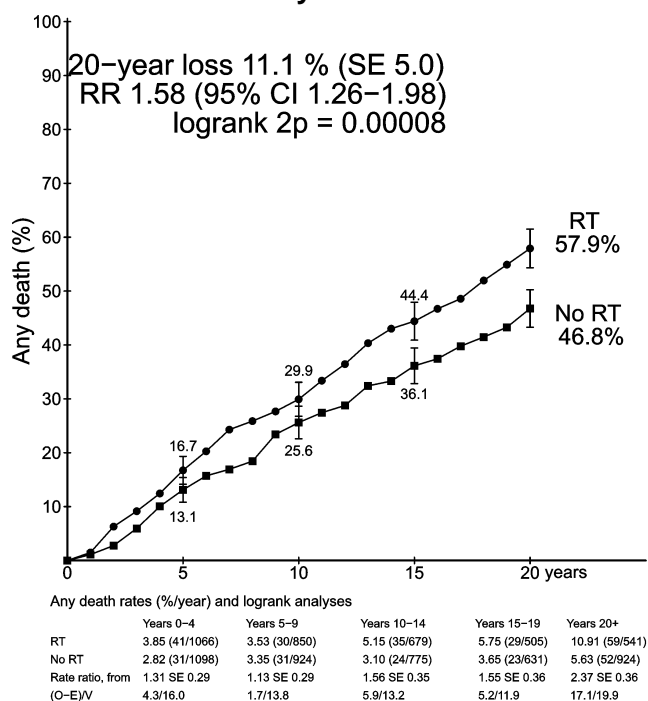

**Webfigure 36. Effect of radiotherapy (RT) to the regional lymph nodes alone versus not after mastectomy and axillary dissection (Mast+AD):**  
 10-year risk of recurrence and type of first recurrence, by allocated treatment, in 465 women with pathologically node-negative (pN0) disease. ( $r_L$  = number of women for whom first recurrence was locoregional,  $r_D$  = number women for whom distant recurrence was first.)

**465 pN0 women with Mast+AD**

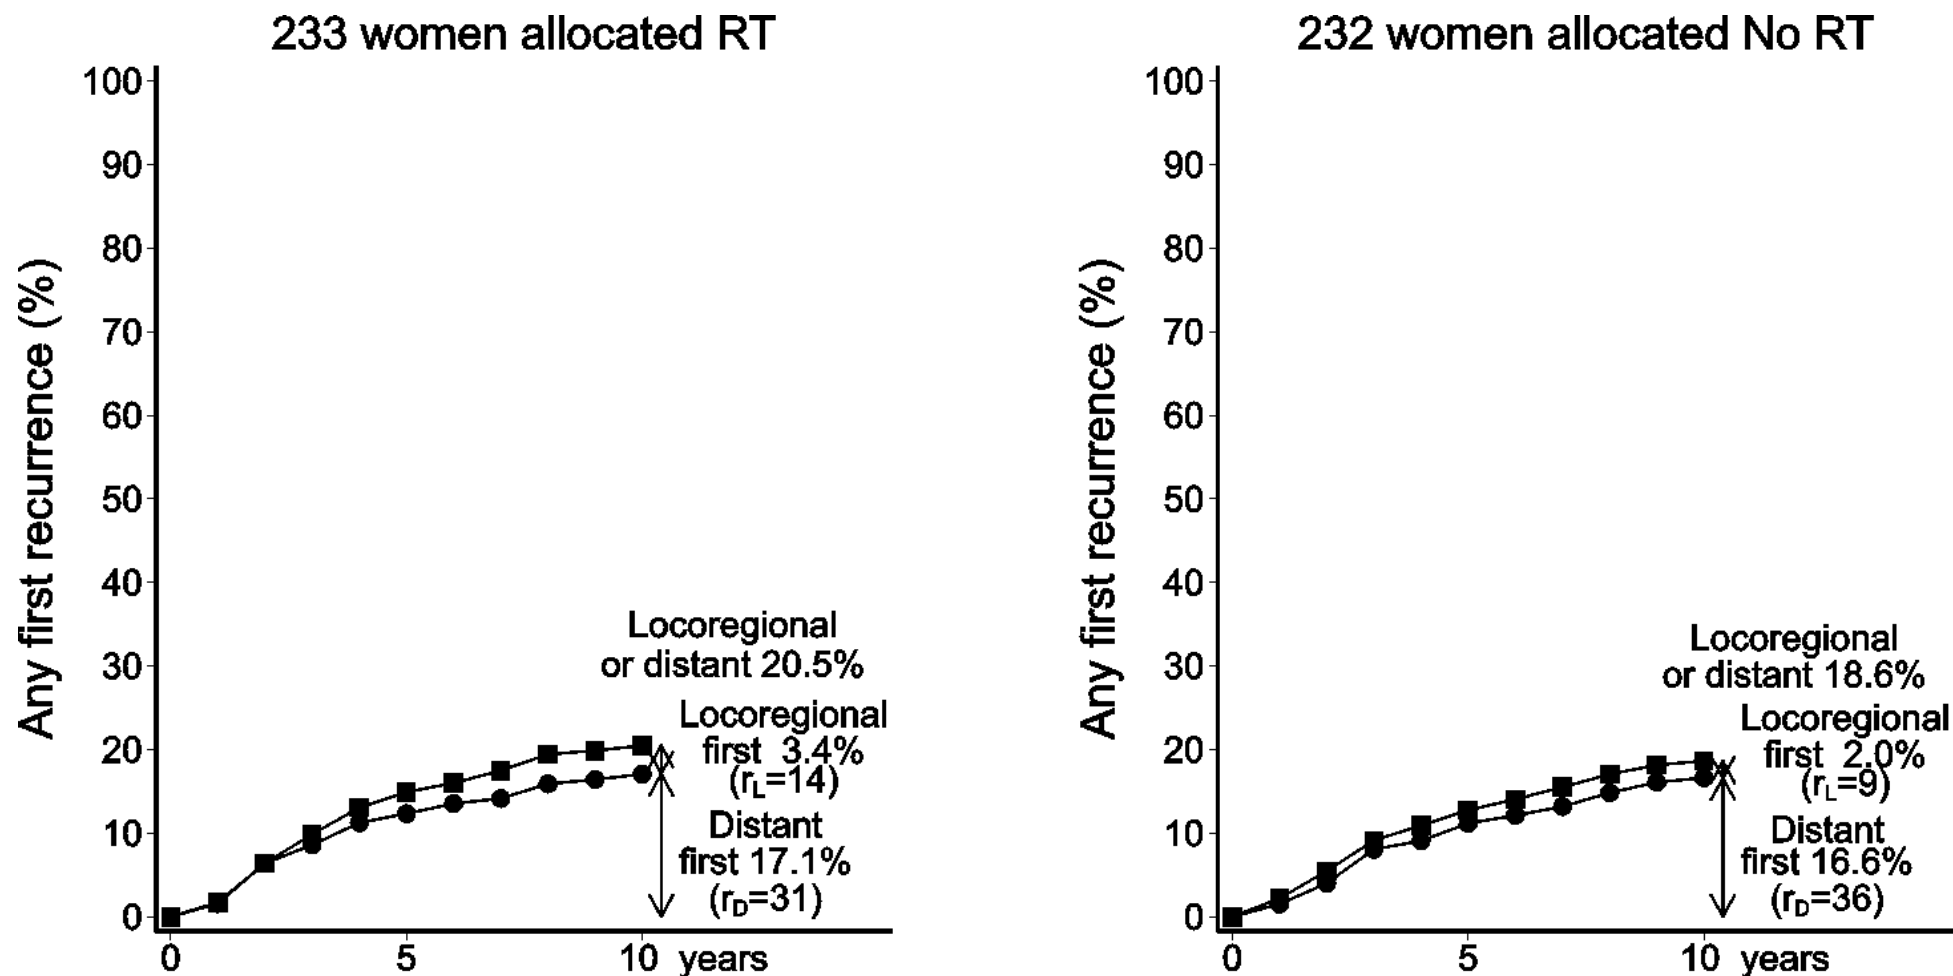

2p for difference between treatment arms in the proportion of all first recurrences that were locoregional: > 0.1; NS

**Webfigure 37. Effect of radiotherapy (RT) to the regional lymph nodes alone versus not after mastectomy and axillary dissection (Mast+AD): 10-year risk of locoregional recurrence and recurrence of any type and 20-year risk of breast cancer and all-cause mortality in 1029 women with pathologically node-positive (pN+) disease. See webfigure 1 for methodological note and also webfigure 38.**

## 1029 pN+ women with Mast+AD

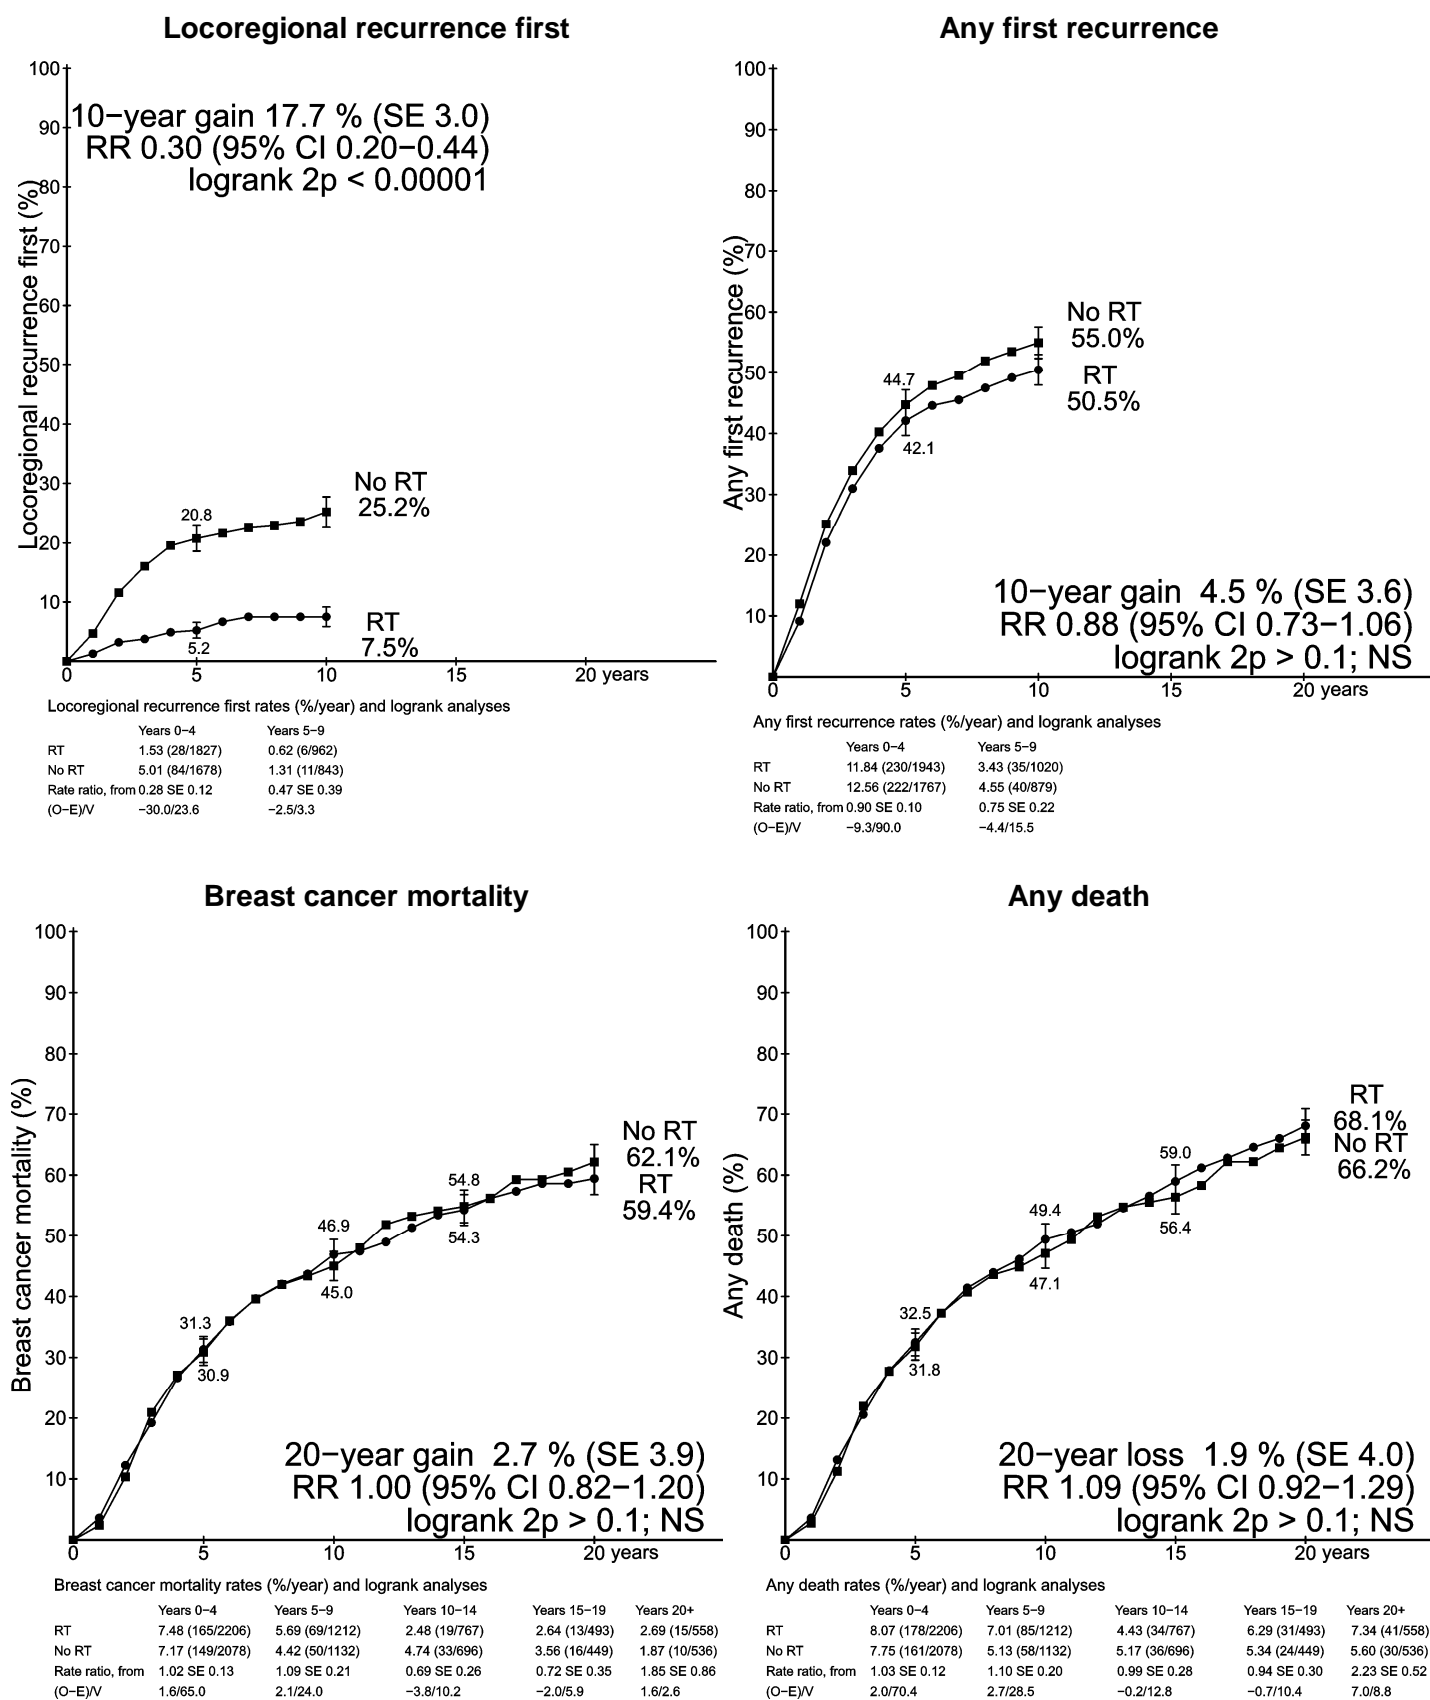

**Webfigure 38. Effect of radiotherapy (RT) to the regional lymph nodes alone versus not after mastectomy and axillary dissection (Mast+AD):**  
 10-year risk of recurrence and type of first recurrence, by allocated treatment, in 1029 women with pathologically node positive (pN+) disease. ( $r_L$  = number of women for whom first recurrence was locoregional,  $r_D$  = number women for whom distant recurrence was first.)

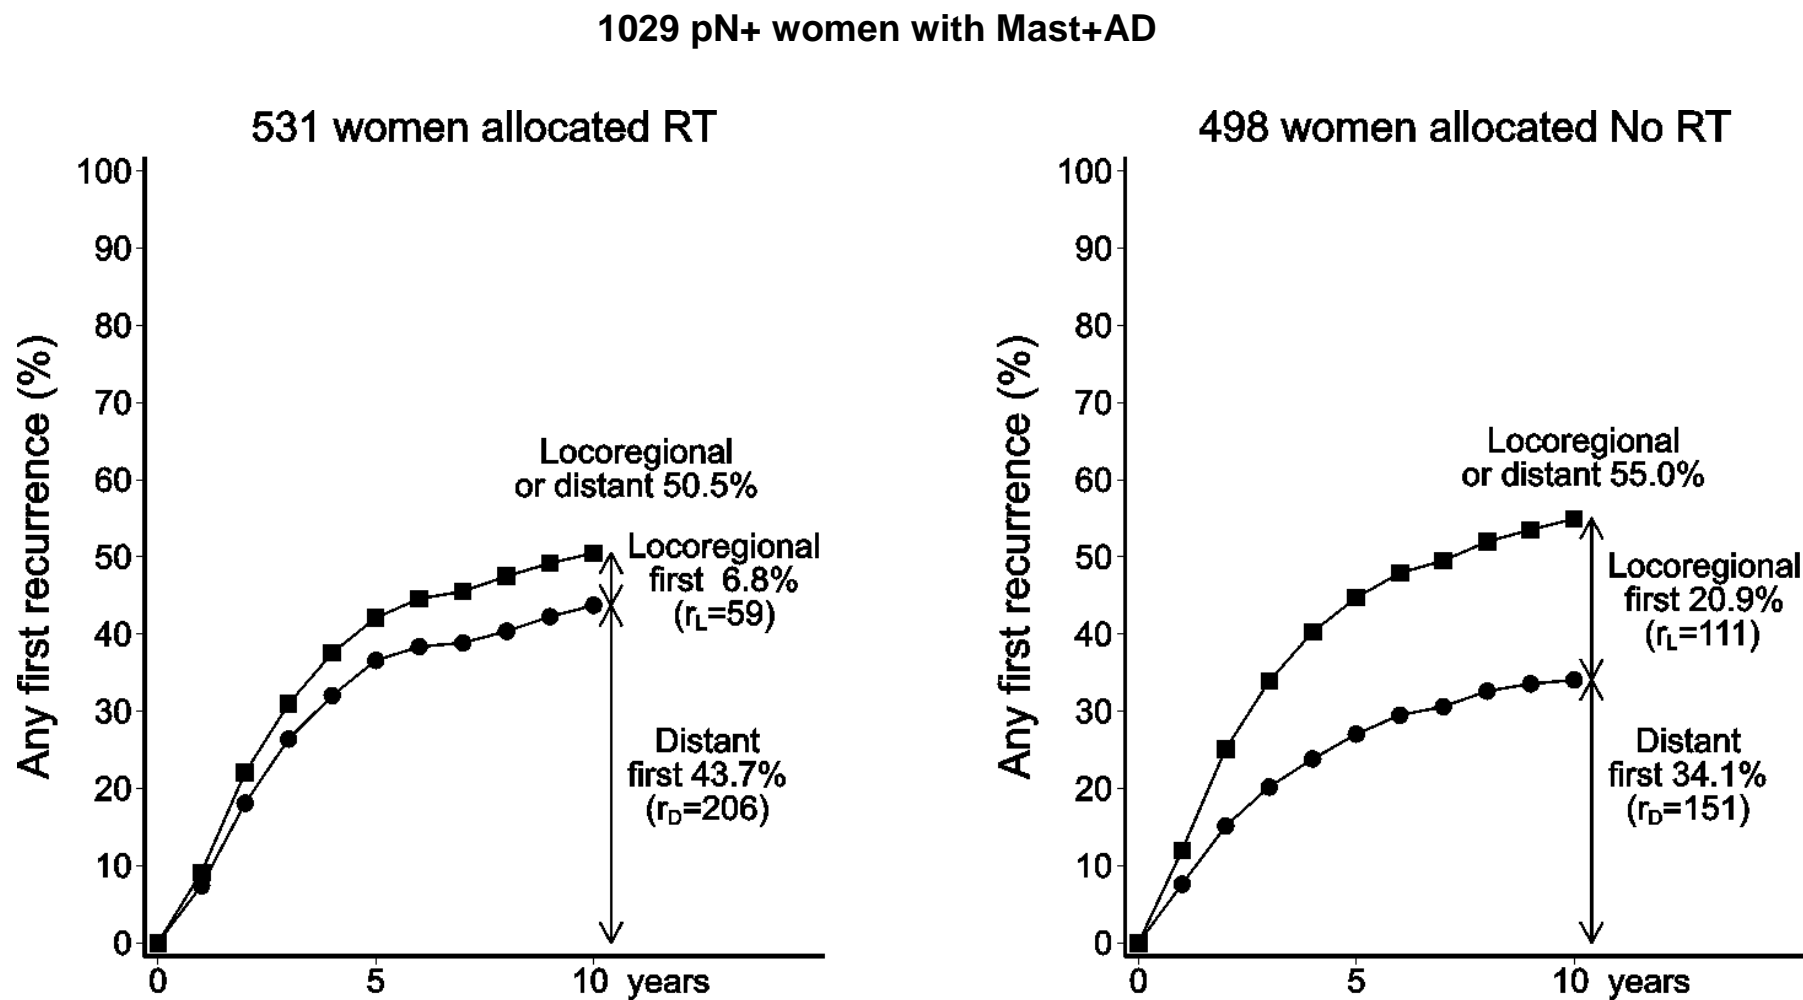

2p for difference between treatment arms in the proportion of all first recurrences that were locoregional: < 0.00001

**Webfigure 39. Effect of radiotherapy (RT) to the regional lymph nodes alone versus not after mastectomy and axillary dissection (Mast+AD) or axillary sampling (Mast+AS):** Event rate ratios, one line per trial, for locoregional recurrence and recurrence of any type during years 0-9 and for breast cancer and all-cause mortality in 465 women with pathologically node-negative (pN0) disease.

465 pN0 women

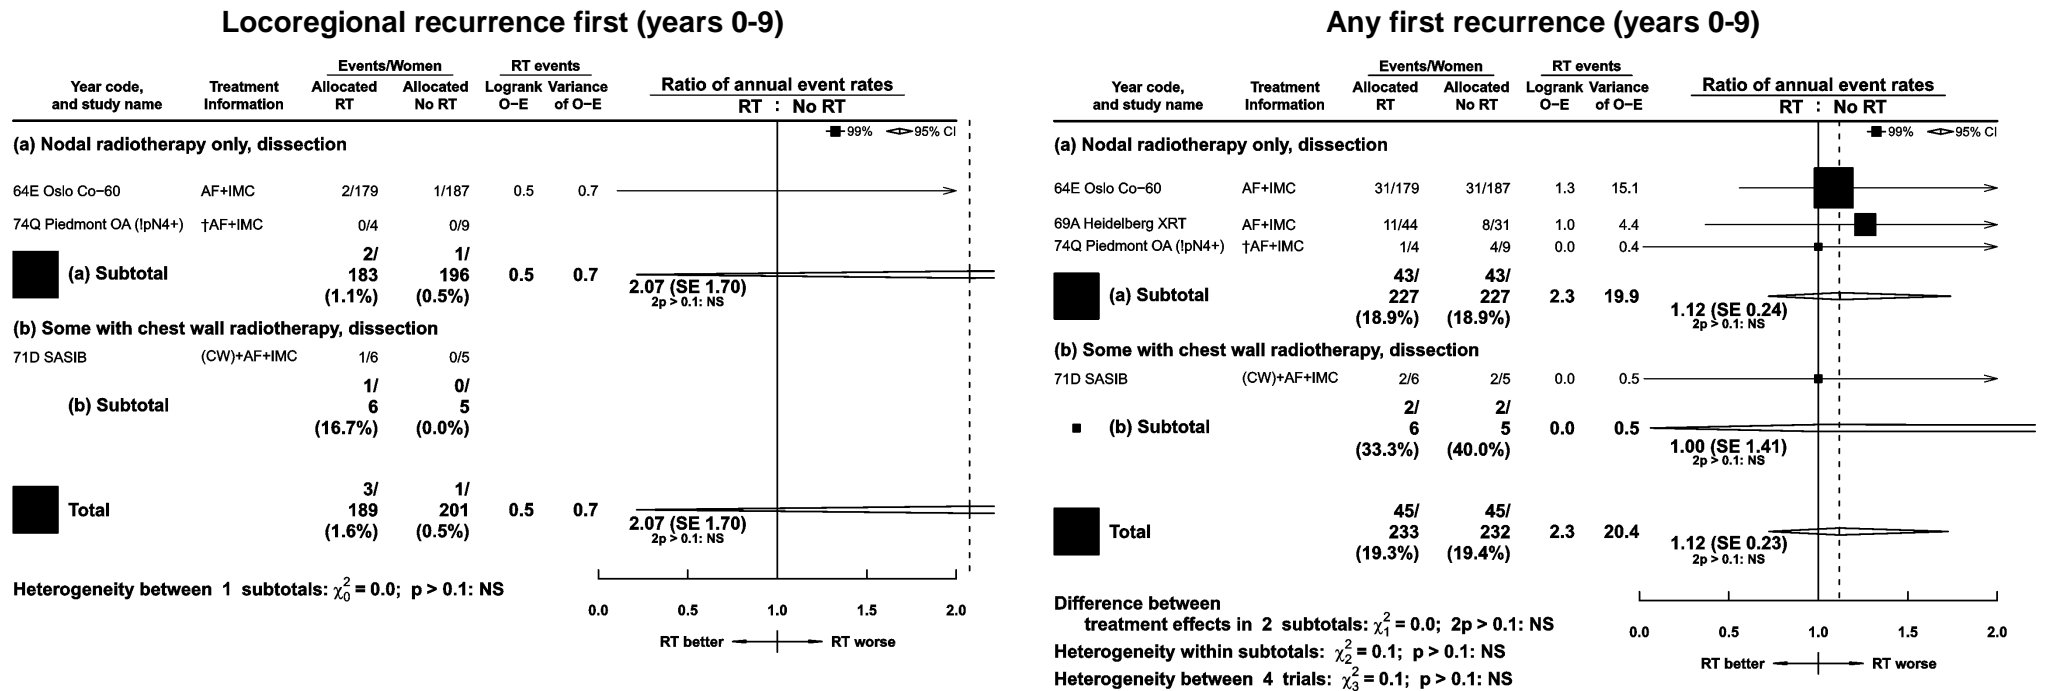

† Same polychemotherapy and/or tamoxifen in both groups.  
Radiotherapy sites: CW=chest wall, AF=Axilla and/or supraclavicular fossa, IMC=Internal mammary chain. Site(s) in brackets were not always treated.

continued overleaf

465 pN0 women

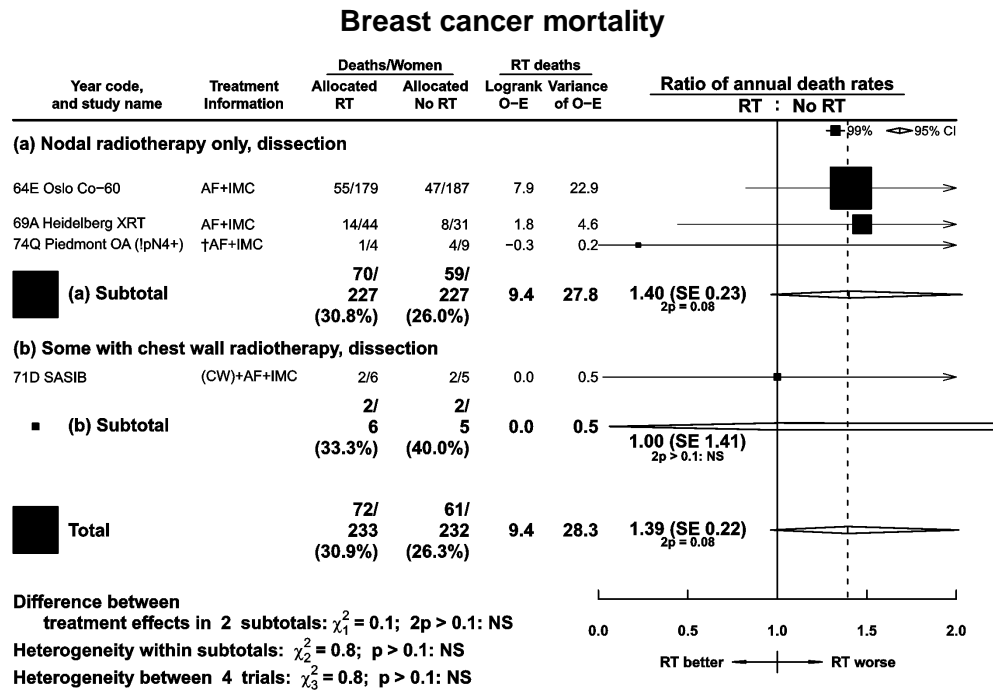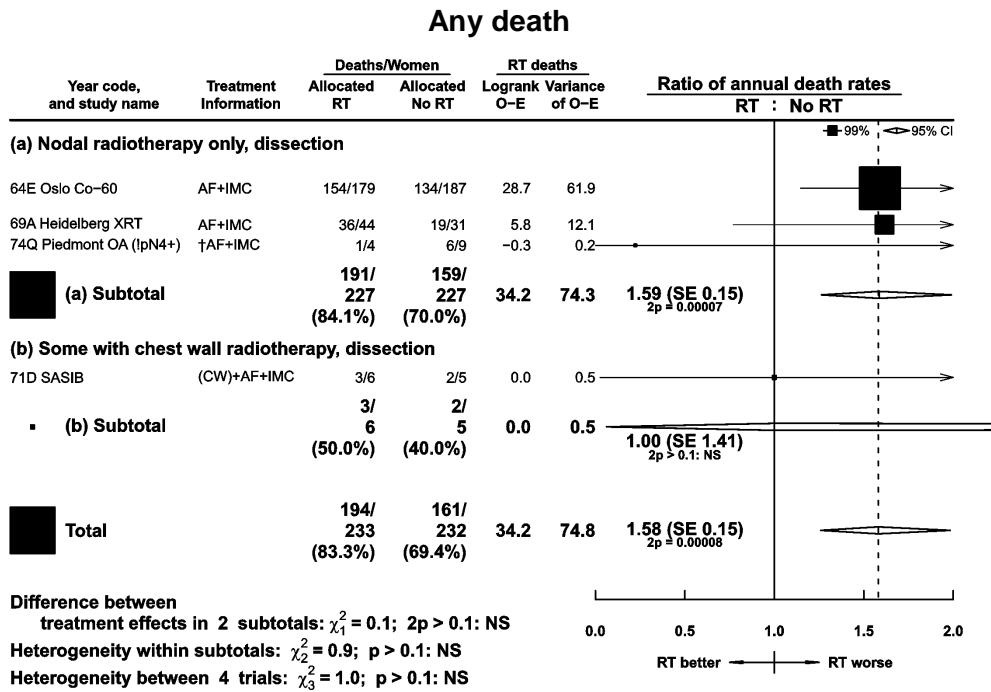

† Same polychemotherapy and/or tamoxifen in both groups.  
Radiotherapy sites: CW=chest wall, AF=Axilla and/or supraclavicular fossa, IMC=Internal mammary chain. Site(s) in brackets were not always treated.

**Webfigure 40. Effect of radiotherapy (RT) to the regional lymph nodes alone versus not after mastectomy and axillary dissection (Mast+AD) or axillary sampling (Mast+AS):** Event rate ratios, one line per trial, for locoregional recurrence and recurrence of any type during years 0-9 and for breast cancer and all-cause mortality in 1029 women with pathologically node-positive (pN+) disease.

1029 pN+ women

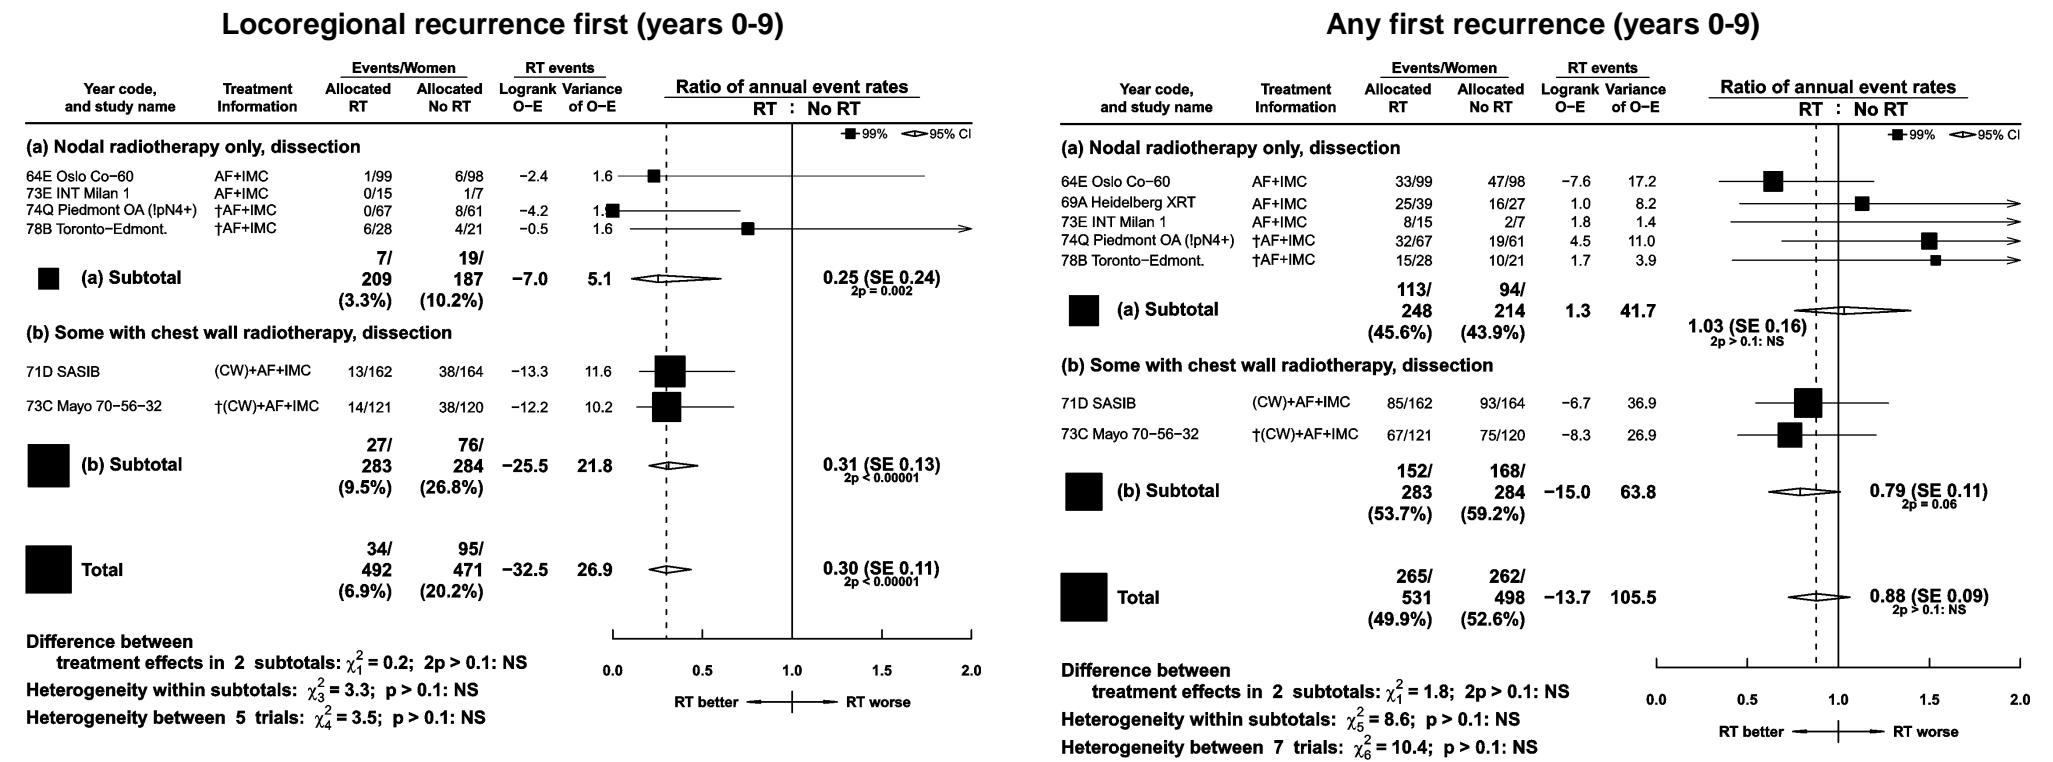

† Same polychemotherapy and/or tamoxifen in both groups.  
Radiotherapy sites: CW=chest wall, AF=Axilla and/or supraclavicular fossa, IMC=Internal mammary chain. Site(s) in brackets were not always treated.

continued overleaf

1029 pN+ women

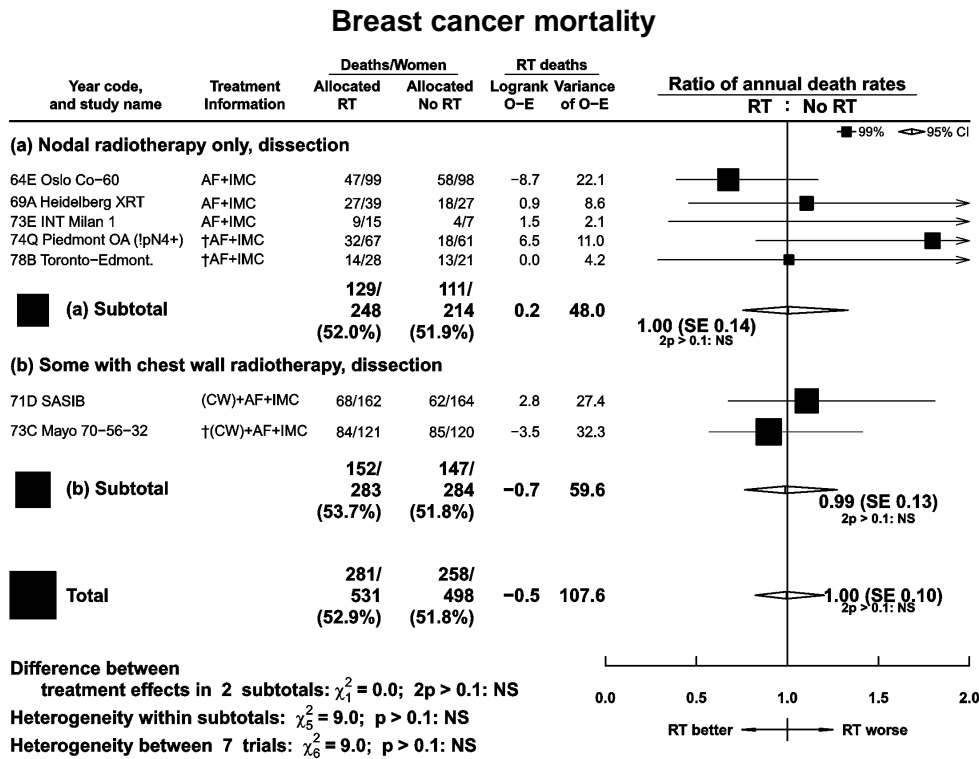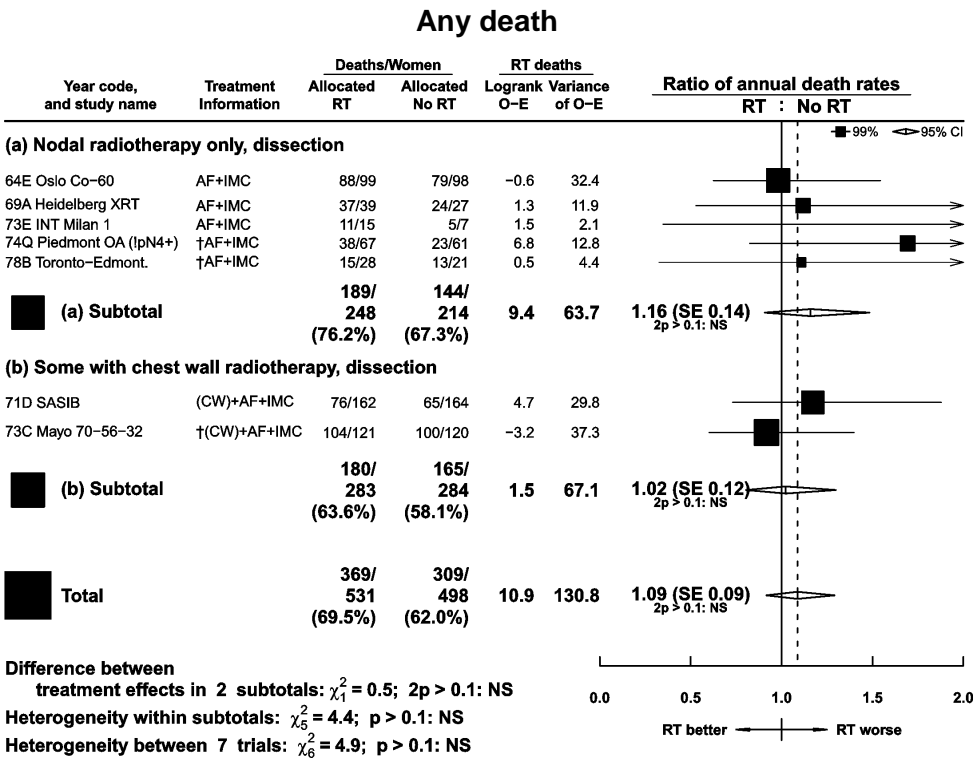

† Same polychemotherapy and/or tamoxifen in both groups.  
Radiotherapy sites: CW=chest wall, AF=Axilla and/or supraclavicular fossa, IMC=Internal mammary chain. Site(s) in brackets were not always treated.

**Webfigure 41. Effect of radiotherapy (RT) to the regional lymph nodes alone versus not after mastectomy and axillary dissection (Mast+AD) or axillary sampling (Mast+AS):** Event rate ratios, one line per trial, for locoregional recurrence and recurrence of any type during years 0-9 and for breast cancer and all-cause mortality in 810 women with unknown pathological nodal status (pN?).

810 pN? women

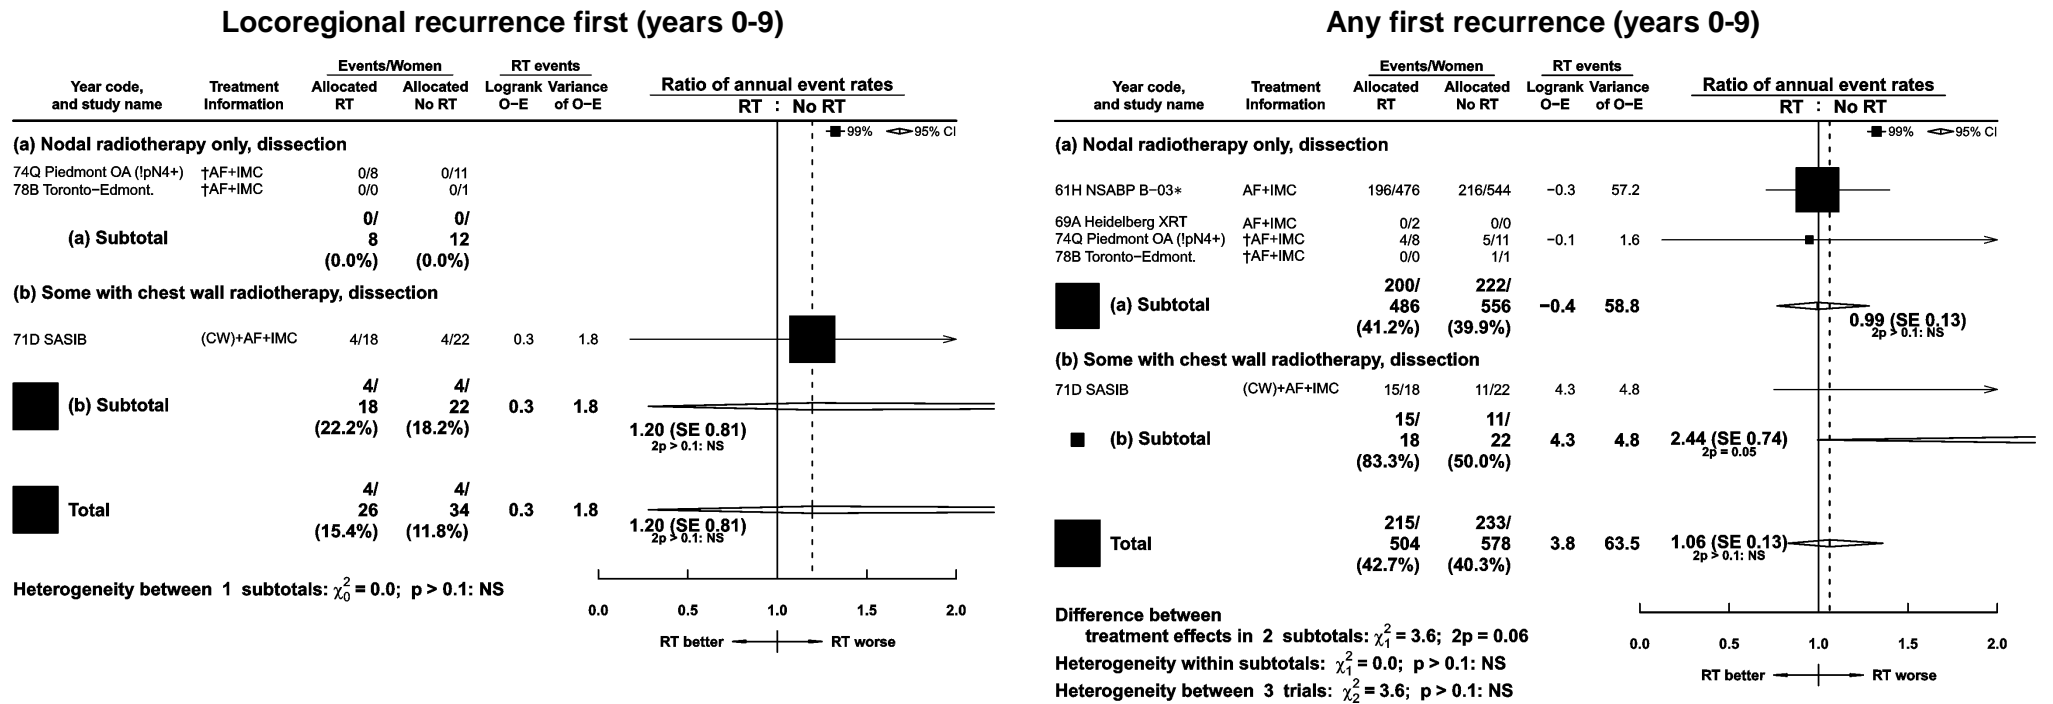

\* For balance, control patients in NSABP B-03 count twice in subtotal and final total of events/deaths/women.  
† Same polychemotherapy and/or tamoxifen in both groups.  
Radiotherapy sites: CW=chest wall, AF=Axilla and/or supraclavicular fossa, IMC=Internal mammary chain. Site(s) in brackets were not always treated.

continued overleaf

810 pN? women

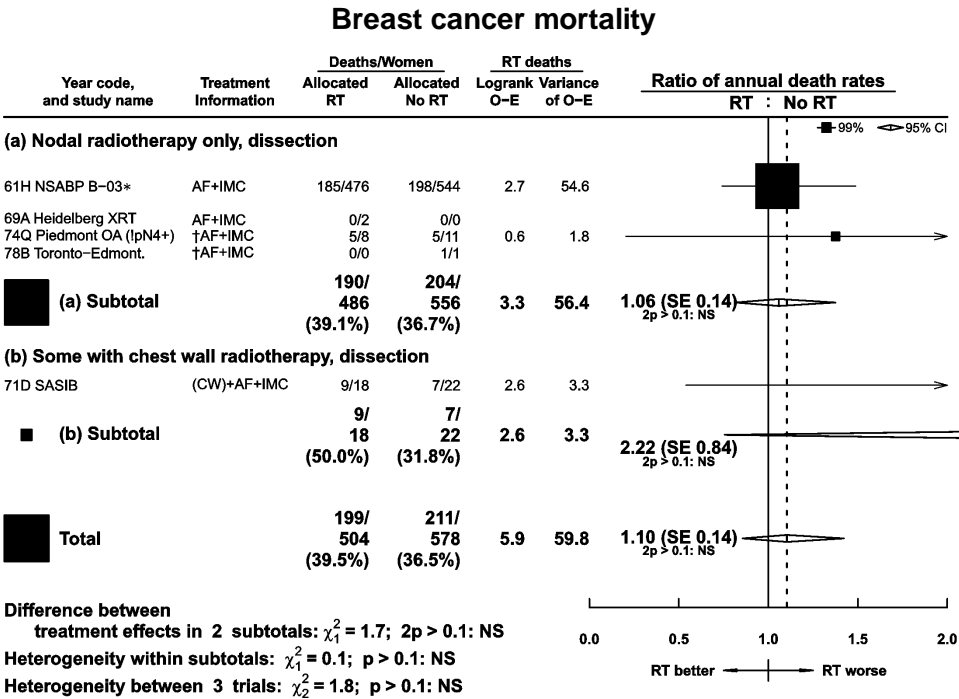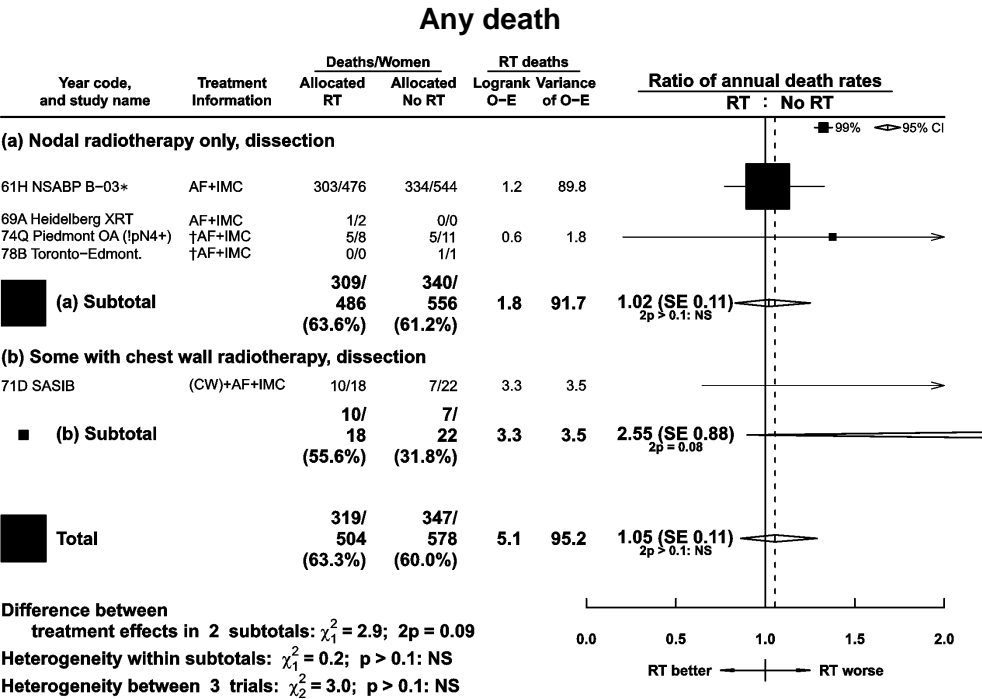

\* For balance, control patients in NSABP B-03 count twice in subtotal and final total of events/deaths/women.  
† Same polychemotherapy and/or tamoxifen in both groups.  
Radiotherapy sites: CW=chest wall, AF=Axilla and/or supraclavicular fossa, IMC=Internal mammary chain. Site(s) in brackets were not always treated.

**Webtable 4. Availability of data from randomised trials beginning before the year 2000 and comparing radiotherapy to the regional lymph nodes alone versus not after mastectomy but no axillary surgery (Mast)\*.**

| Nodal status†       | Women | Deaths | Woman-years since diagnosis |                  |                               | % women given systemic therapy |      |              |                    |     |
|---------------------|-------|--------|-----------------------------|------------------|-------------------------------|--------------------------------|------|--------------|--------------------|-----|
|                     |       |        | Median/<br>woman            | Total<br>(‘000s) | Distribution by years (‘000s) |                                |      | Chemotherapy | ER+ &<br>Tamoxifen | Any |
|                     |       |        |                             |                  | <10                           | 10-                            | 20+  |              |                    |     |
| Axillary dissection |       |        |                             |                  |                               |                                |      |              |                    |     |
| cN-                 | 2896  | 2098   | 12.4                        | 45.3             | 21.7                          | 12.8                           | 10.8 | 0            | 2                  | 2   |
| cN+                 | 1481  | 1188   | 9.6                         | 21.5             | 10.5                          | 5.9                            | 5.1  | 0            | 1                  | 1   |
| Total               | 4377  | 3286   | 11.5                        | 66.8             | 32.2                          | 18.7                           | 15.9 | 0            | 2                  | 2   |

\*Data available for 4 trials, start dates 1970 to 1978. In all trials radiotherapy was given to the axilla/supraclavicular fossa and the internal mammary chain. Full details of the trials are given in webtable 5.

† cN-: negative clinical nodal status, cN+: positive clinical nodal status.

**Webtable 5: Randomised trials beginning before the year 2000 and comparing radiotherapy to the chest wall and regional lymph nodes versus not after mastectomy but no axillary surgery (Mast) – treatment details.**

| Year code and study name | Breast surgery | Axillary Surgery* (number of patients) | Chest wall RT                    | Supraclavicular and axillary fossa RT | Internal mammary chain RT        | Boost RT to scar | Common systemic chemoendocrine therapy |
|--------------------------|----------------|----------------------------------------|----------------------------------|---------------------------------------|----------------------------------|------------------|----------------------------------------|
| 70A Manchester RBS1      | SM             | Axillary sampling (714)                | 30-37 Gy (2-2.5 Gy/f) o          | 37-40 Gy (2.5-2.7 Gy/f) o or m        | 37-40 Gy (2.5-2.7 Gy/f) o or m   | None             | Ovarian ablation                       |
| 70B Kings/Cambridge      | SM             | Axillary sampling ( 2,800)             | 28.5-46 Gy (1.5-3.2 Gy/f) o or s | 28.5-46 Gy (1.5-3.2 Gy/f) o or s      | 28.5-46 Gy (1.5-3.2 Gy/f) o or s | None             | None                                   |
| 71C NSABP B-04           | SM             | Axillary sampling (770)                | 50 Gy (2 Gy/f) s                 | 45-50 Gy de (1.8-2.0 Gy/f) s          | 45 Gy de (1.8 Gy/f) s            | None             | None                                   |
| 78D Scottish D           | SM             | Axillary sampling (93)                 | 37-45 Gy (2.3-3.7 Gy/f) o or m   | 38.4-45.9 Gy (2.3-3.8 Gy/f) o or m    | 40-45 Gy (2.3-2.7 Gy/f) o or m   | None             | Tamoxifen or not                       |

\* Based on the description of axillary surgery in the trial protocol or publications or on lymph node information on individual women. Women were classified as having axillary sampling if they were in a trial where the protocol specified axillary sampling or, if individual information was available, resection of <10 nodes. In other trials, women were classified as having axillary sampling if the trial publication indicated that the median number of nodes removed was < 10, f=fraction, Gy=Gray (intended dose), m=megavoltage, RM=modified radical mastectomy, o=orthovoltage, RM=radical mastectomy (Halsted), RT=radiotherapy, SM=simple (total) mastectomy.

## References for Webtable 5

| Year code and study name | Reference                                                                                                                                                                                                                                                                                                                                                                                                                                                                                                                                                                                                                                                    |
|--------------------------|--------------------------------------------------------------------------------------------------------------------------------------------------------------------------------------------------------------------------------------------------------------------------------------------------------------------------------------------------------------------------------------------------------------------------------------------------------------------------------------------------------------------------------------------------------------------------------------------------------------------------------------------------------------|
| 70A Manchester RBS1      | Lythgoe JP, Palmer MK. Manchester regional breast study-5 and 10 year results. <i>Br J Surg</i> 1982; <b>69</b> : 693–6.                                                                                                                                                                                                                                                                                                                                                                                                                                                                                                                                     |
| 70B Kings/Cambridge      | Houghton J, Baum M, Haybittle JL. Role of radiotherapy following total mastectomy in patients with early breast cancer. The Closed Trials Working Party of the CRC Breast Cancer Trials Group. <i>World J Surg</i> 1994; <b>18</b> : 117–22.                                                                                                                                                                                                                                                                                                                                                                                                                 |
| 71C NSABP B-04           | Fisher B, Montague E, Redmond C, Deutsch M, Brown GR, Zauber A, et al. Findings from NSABP protocol no. B-04-comparison of radical mastectomy with alternative treatments for primary breast cancer. I. Radiation compliance and its relation to treatment outcome. <i>Cancer</i> 1980; <b>46</b> : 1–13.<br><br>Deutsch M, Land S, Begovic M, Sharif S. The incidence of arm edema in women with breast cancer randomized on the National Surgical Adjuvant Breast and Bowel Project study B-04 to radical mastectomy versus total mastectomy and radiotherapy versus total mastectomy alone. <i>Int J Radiat Oncol Biol Phys</i> 2008; <b>70</b> : 1020–4. |
| 78D Scottish D           | Stewart HJ, Prescott RJ, Forrest AP. Scottish adjuvant tamoxifen trial: a randomized study updated to 15 years. <i>J Natl Cancer Inst</i> 2001; <b>93</b> : 456–62.                                                                                                                                                                                                                                                                                                                                                                                                                                                                                          |

**Webfigure 42. Effect of radiotherapy (RT) to the chest wall and regional lymph nodes versus not after mastectomy but no axillary surgery (Mast): 10-year risk of locoregional recurrence and recurrence of any type and 20-year risks of breast cancer and all-cause mortality in 2896 women with clinically node-negative (cN-) disease. See webfigure 1 for methodological note and also webfigure 43**

## 2896 cN- women with Mast

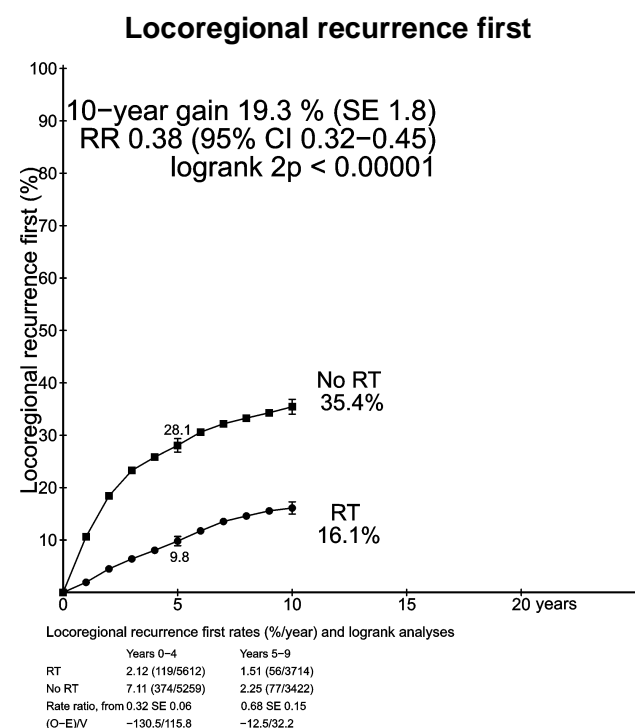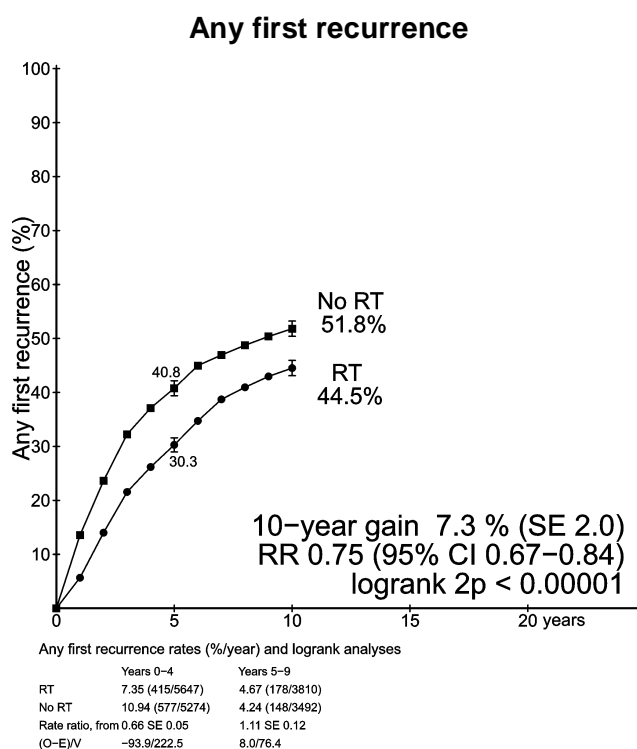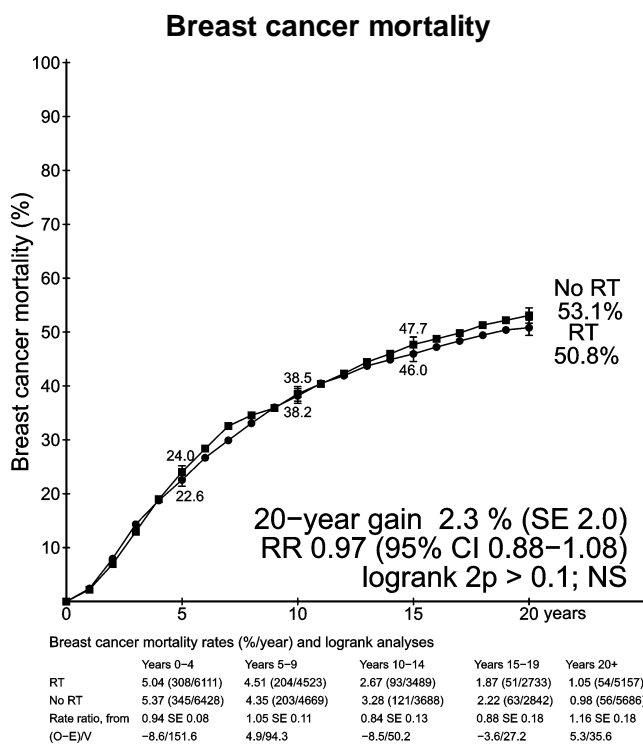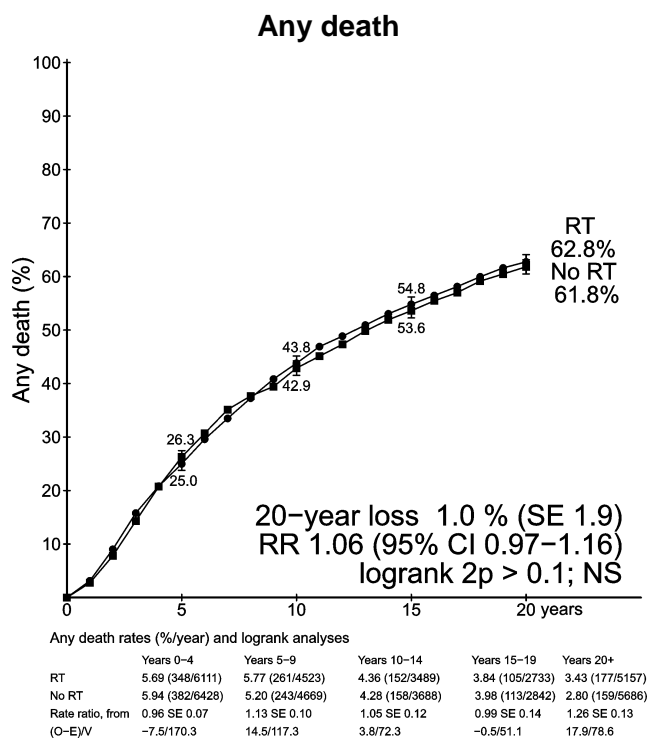

**Webfigure 43. Effect of radiotherapy (RT) to the chest wall and regional lymph nodes versus not after mastectomy but no axillary surgery (Mast):** 10-year risk of recurrence and type of first recurrence in 2896 women with clinically node-negative (cN-) disease. ( $r_L$  = number of women for whom first recurrence was locoregional,  $r_D$  = number women for whom distant recurrence was first.)

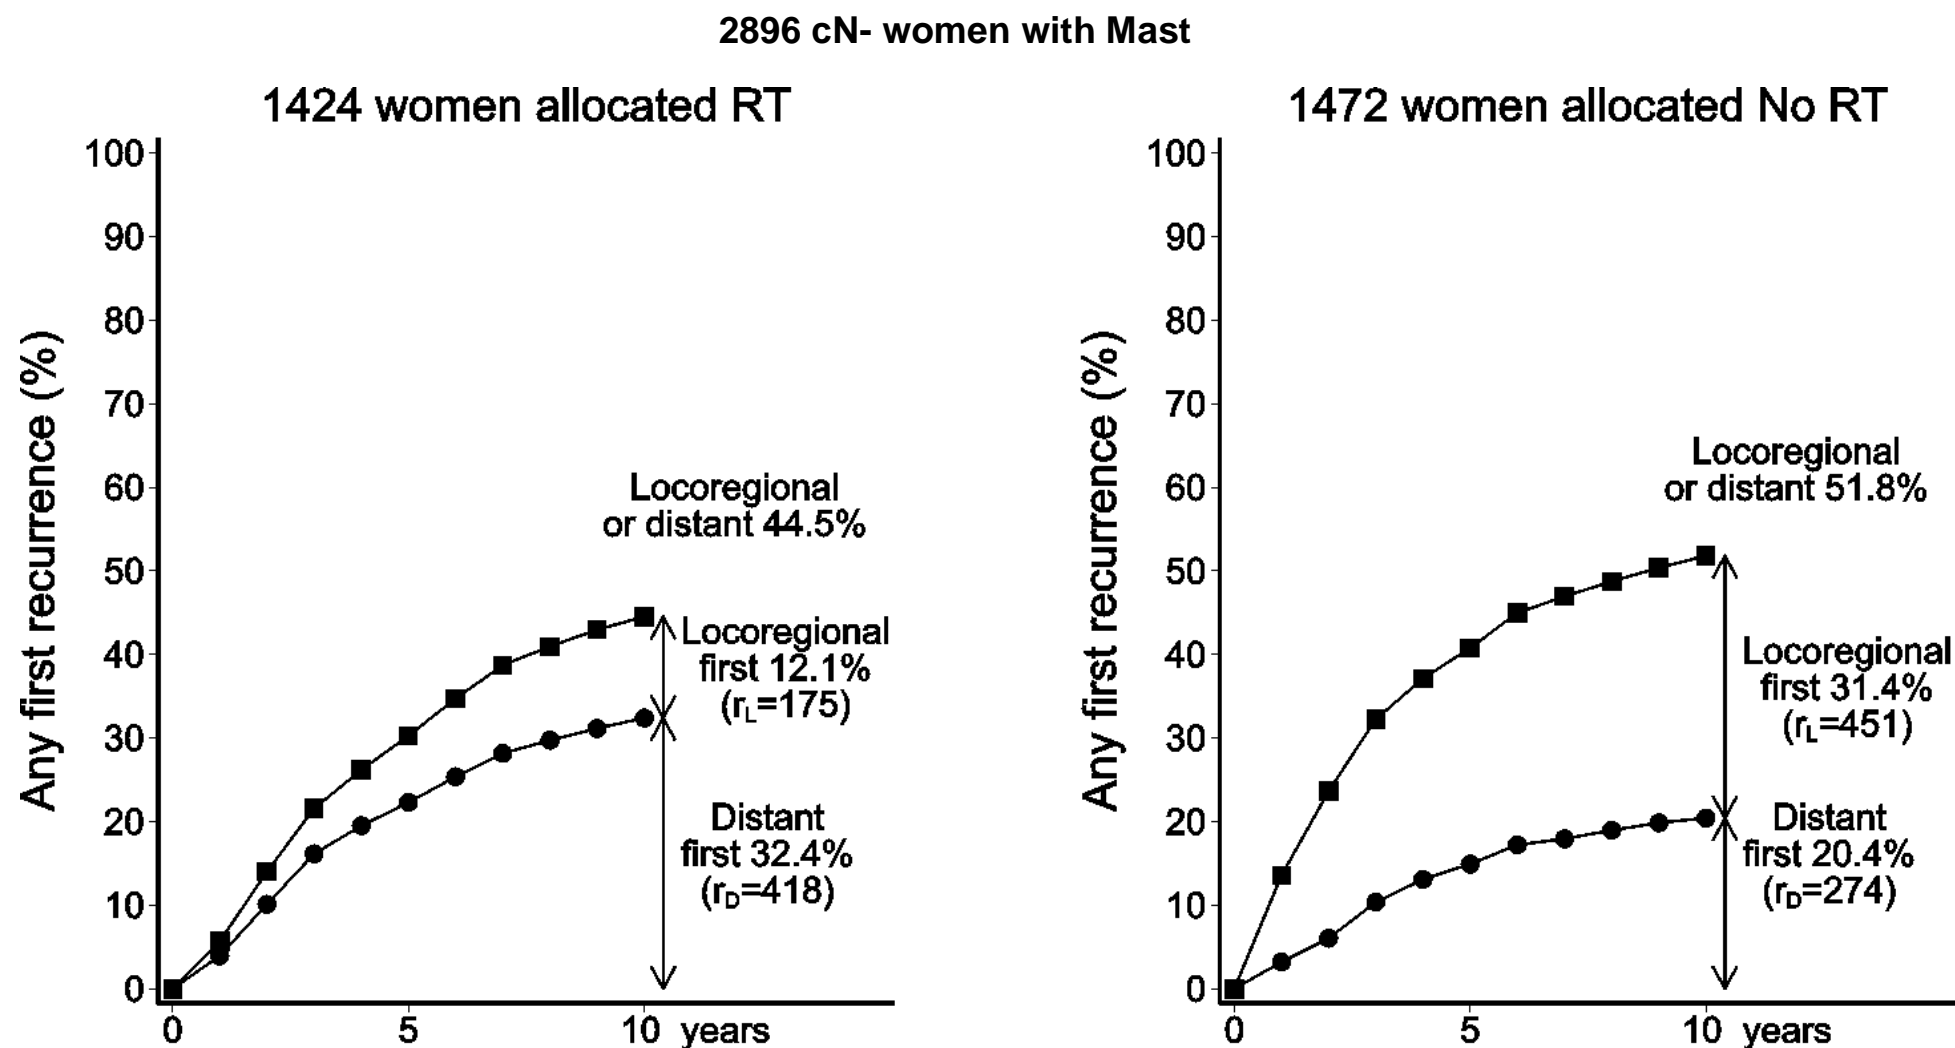

2p for difference between treatment arms in the proportion of all first recurrences that were locoregional: < 0.00001

**Webfigure 44. Effect of radiotherapy (RT) to the chest wall and regional lymph nodes versus not after mastectomy but no axillary surgery (Mast): 10-year risk of locoregional recurrence and recurrence of any type and 20-year risks of breast cancer and all-cause mortality in 1481 women with clinically node-positive (cN+) disease. See webfigure 1 for methodological note and also webfigure 45**

## 1481 cN+ women with Mast

### Locoregional recurrence first

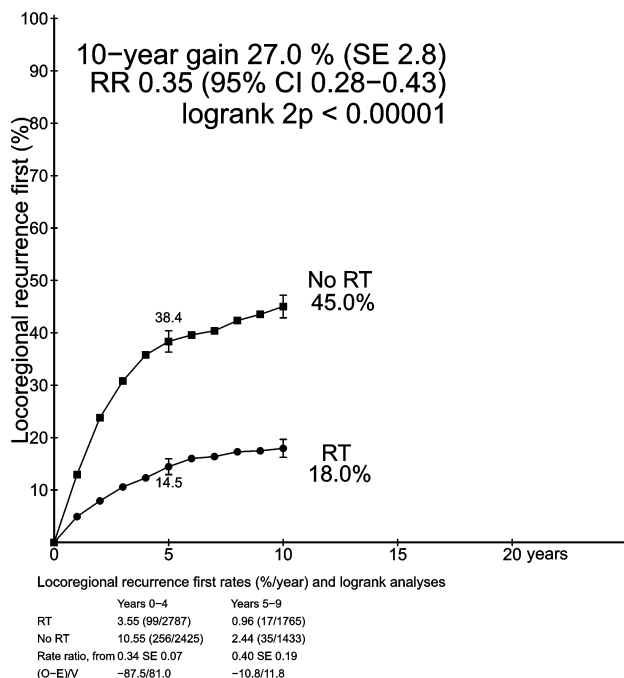

### Any first recurrence

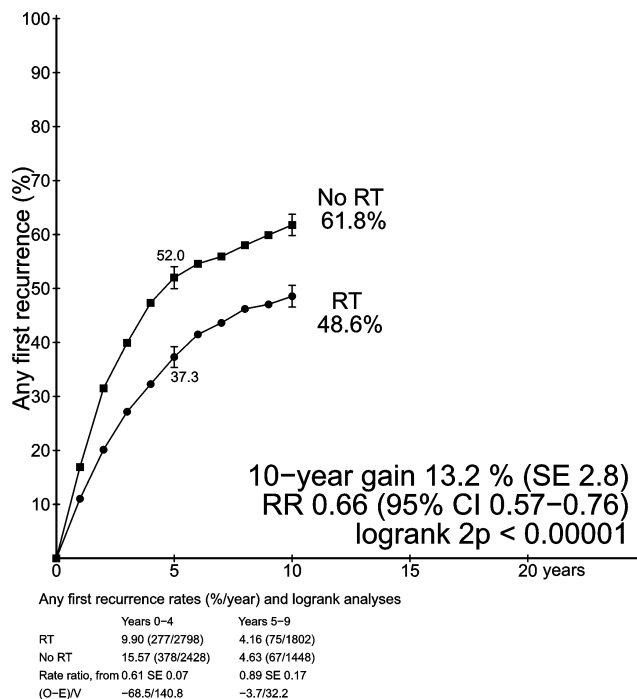

### Breast cancer mortality

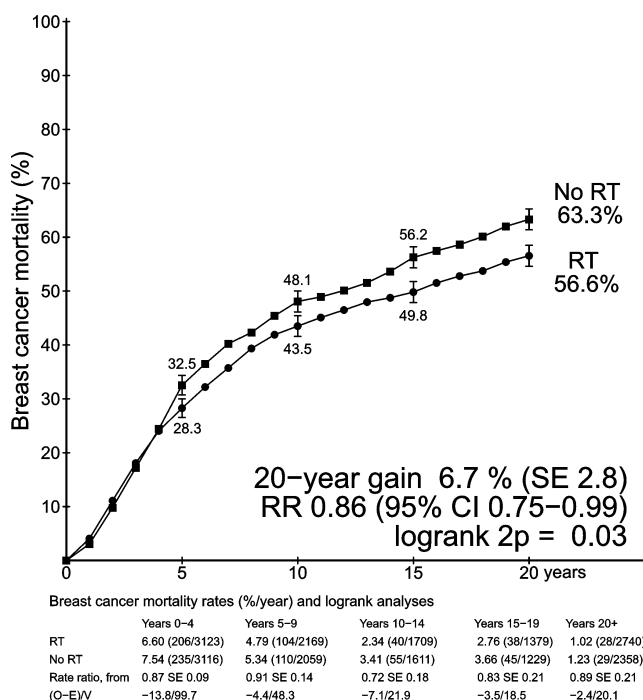

### Any death

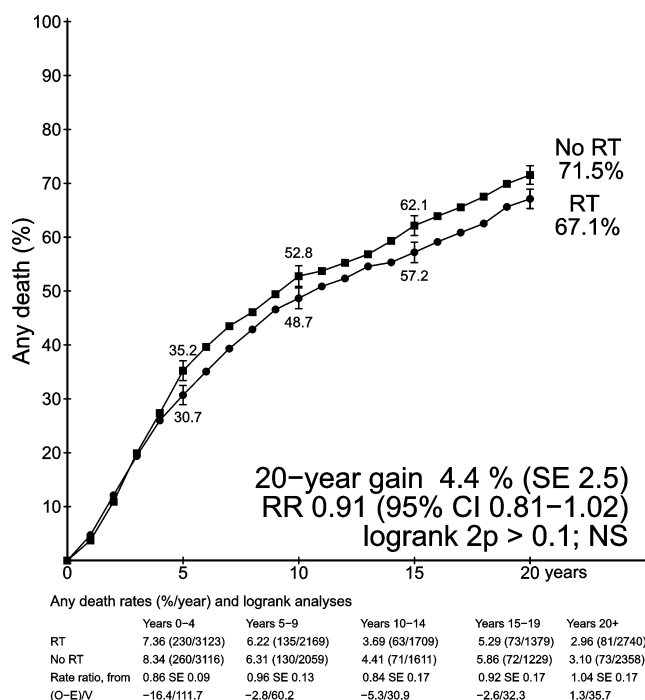

**Webfigure 45. Effect of radiotherapy (RT) to the chest wall and regional lymph nodes versus not after mastectomy but no axillary surgery (Mast):** 10-year risk of recurrence and type of first recurrence in 1481 women with clinically node-positive (cN+) disease. ( $r_L$  = number of women for whom first recurrence was locoregional,  $r_D$  = number women for whom distant recurrence was first.)

**1481 cN+ women with Mast**

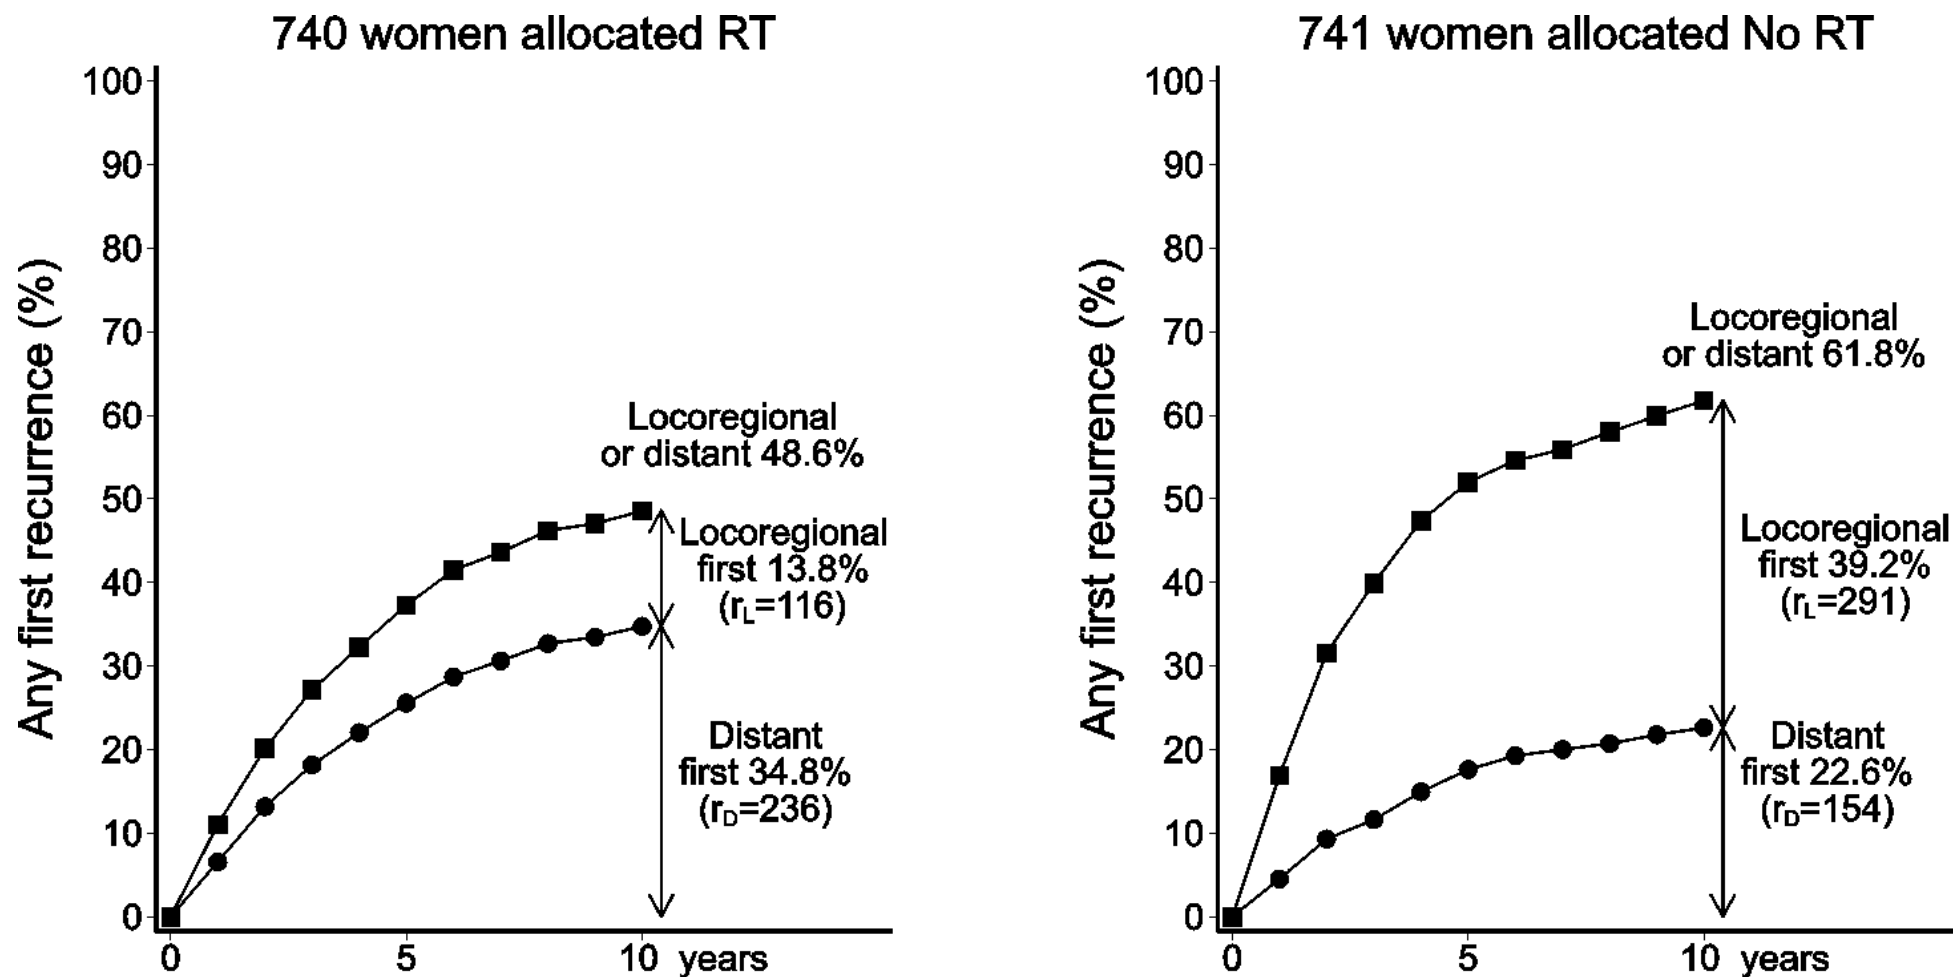

2p for difference between treatment arms in the proportion of all first recurrences that were locoregional:  $< 0.00001$

**Webtable 6. Availability of data from randomised trials beginning before the year 2000 and comparing radiotherapy to the regional lymph nodes alone versus not after mastectomy but no axillary surgery (Mast)\*.**

| Nodal status†       | Women | Deaths | Woman-years since diagnosis |                  |                               |            | % women given systemic therapy‡ |                    |     |     |
|---------------------|-------|--------|-----------------------------|------------------|-------------------------------|------------|---------------------------------|--------------------|-----|-----|
|                     |       |        | Median/<br>woman            | Total<br>(‘000s) | Distribution by years (‘000s) |            | Chemotherapy                    | ER+ &<br>Tamoxifen | Any |     |
|                     |       |        |                             |                  | <10                           | 10-<br>20+ |                                 |                    |     |     |
| Axillary dissection |       |        |                             |                  |                               |            |                                 |                    |     |     |
| cN-                 | 8     | 6      | 3.5                         | <0.1             | <0.1                          |            |                                 | 100                | 0   | 100 |
| cN+                 | 192   | 97     | 6.8                         | 1.2              | 1.2                           | <0.1       |                                 | 100                | 0   | 100 |
| Total               | 200   | 103    | 6.5                         | 1.3              | 1.2                           | <0.1       |                                 | 100                | 0   | 100 |

\*Data available for 2 trials, start dates 1985 to 1988. In all trials radiotherapy was given to the axilla/supraclavicular fossa and the internal mammary chain. Full details of the trials are given in webtable 7.

† cN-: negative clinical nodal status, cN+: positive clinical nodal status.

‡ Chemotherapy was cyclophosphamide, methotrexate, 5-fluorouracil [CMF].

**Webtable 7. Randomised trials beginning before the year 2000 and comparing radiotherapy to the regional lymph nodes alone versus not after mastectomy but no axillary surgery (Mast) – treatment details.**

| Year code and study name | Breast surgery | Axillary dissection* (number of patients) | Chest wall RT | Supraclavicular and axillary fossa RT | Internal mammary chain RT | Boost RT to scar | Common systemic chemoendocrine therapy |
|--------------------------|----------------|-------------------------------------------|---------------|---------------------------------------|---------------------------|------------------|----------------------------------------|
| 85Z Tokyo CIH PS         | EM             | Axillary sampling (100)                   | None          | 42-48 Gy (2-3 Gy/f)                   | 42-48 Gy (2-3 Gy/f)       | None             | CMF                                    |
| 88U Tokyo CIH CZ         | EM             | Axillary sampling (100)                   | None          | 42-48 Gy (2-3 Gy/f)                   | 42-48 Gy (2-3 Gy/f)       | None             | CMF                                    |

\*Based on the description of axillary surgery in the trial protocol or publications or on information on individual women. Women were classified as having axillary sampling if they were in a trial where the protocol specified no axillary dissection or, if individual information was available, resection of <10 nodes. In other trials, women were classified as having axillary sampling if the trial publication indicated that the median number of nodes removed was < 10, C=cyclophosphamide, EM=Extended mastectomy (ipsilateral parasternal and supraclavicular lymph node dissection), F=fluorouracil, f=fraction, Gy=Gray (intended dose), M=methotrexate, RT=radiotherapy.

## References for Webtable 7

| Year code and study name | Reference                                                                                                                                                                                                                                                                                                                                               |
|--------------------------|---------------------------------------------------------------------------------------------------------------------------------------------------------------------------------------------------------------------------------------------------------------------------------------------------------------------------------------------------------|
| 85Z Tokyo CIH PS         | Yamashita TH, Masahiko; Sekiguchi, Kenji; Kobayashi, Masao; Tanaka, Emiko; Uki, Akiyoshi; Kasumi, Fujio; Yoshimoto, Masataka. Efficacy of loco-regional lymphnodes irradiation after mastectomy for breast cancer with biopsy proven parasternal lymphnodes metastases — A randomized study. <i>Int J Radiat Oncol Biol Phys</i> 1996; <b>36</b> : 277. |
| 88U Tokyo CIH CZ         | Personal Correspondence from Dr M Yoshimoto                                                                                                                                                                                                                                                                                                             |

**Webfigure 46. Effect of radiotherapy (RT) to the regional lymph nodes alone versus not after mastectomy but no axillary surgery (Mast): 10-year risks of recurrence, breast cancer and all-cause mortality in 192 clinically node-positive (cN+) women.** See webfigure 1 for methodological note and also webfigure 47. Note, due to the very small number (8) of clinically node-negative women in this set of trials they are shown only in webfigure 48.

## 192 cN+ women with Mast

### Locoregional recurrence first

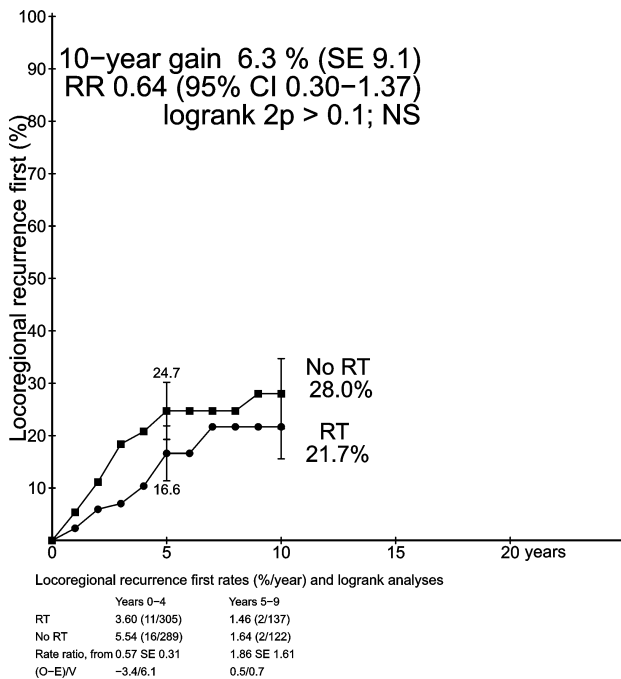

### Any first recurrence

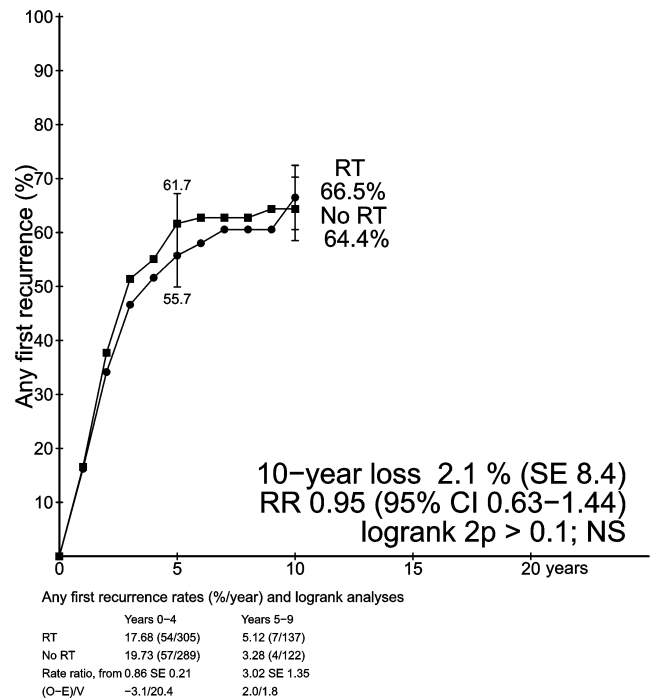

### Breast cancer mortality

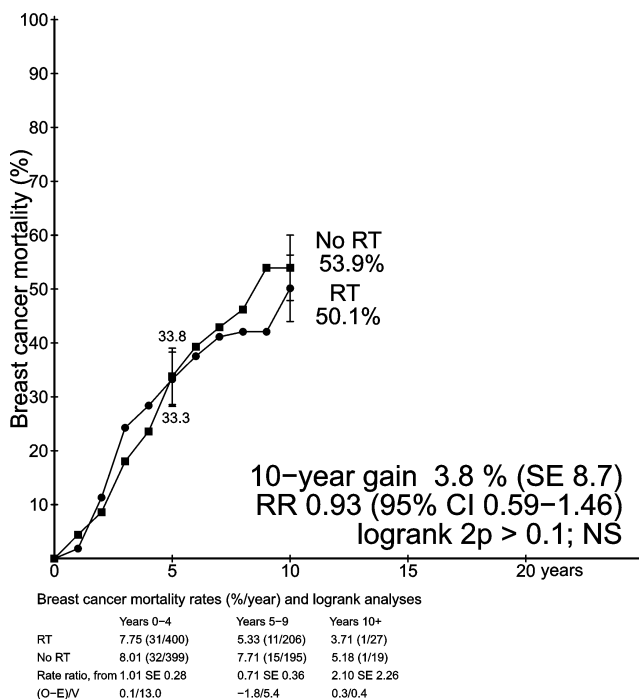

### Any death

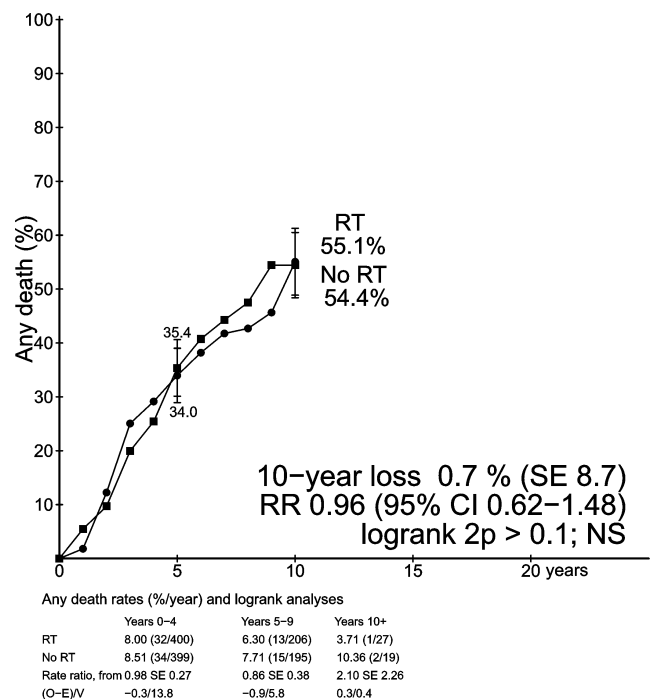

**Webfigure 47. Effect of radiotherapy (RT) to the regional lymph nodes versus not after mastectomy but no axillary surgery (Mast): 10-year risk of recurrence and type of first recurrence in 192 women with clinically node-positive (cN+) disease.** ( $r_L$  = number of women for whom first recurrence was locoregional,  $r_D$  = number women for whom distant recurrence was first.)

**192 cN+ women with Mast**

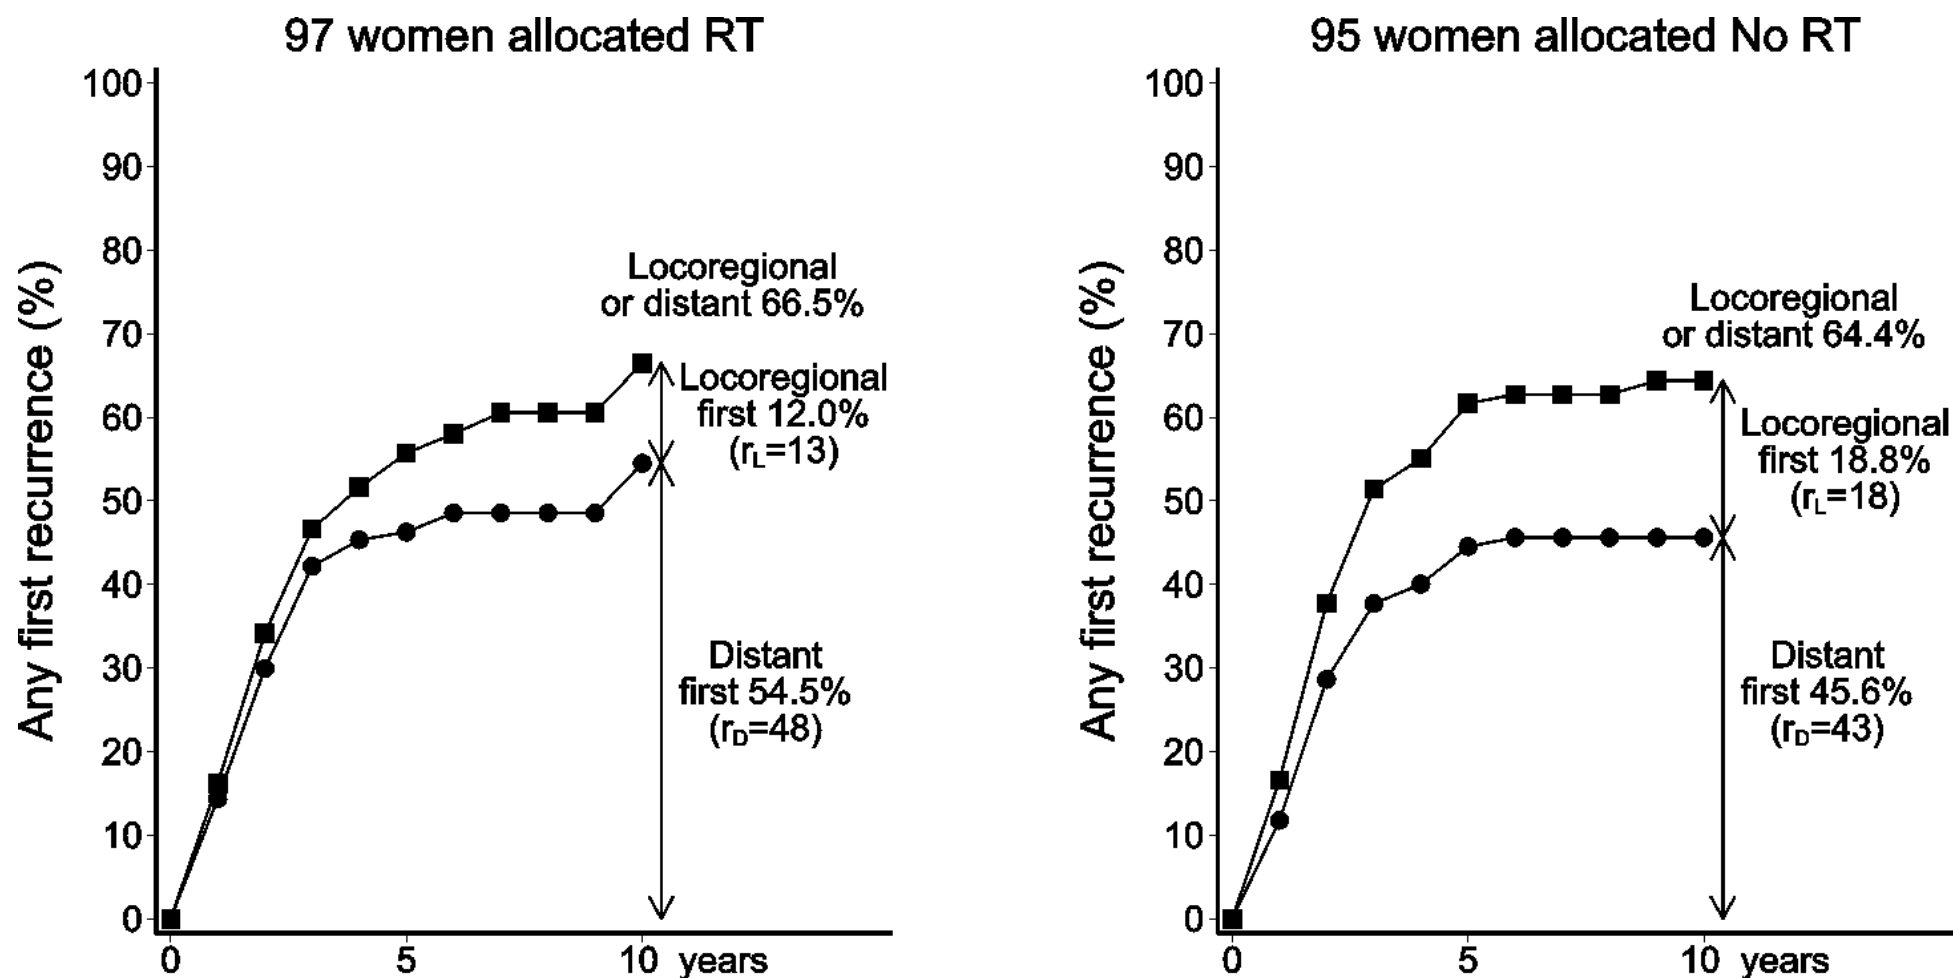

2p for difference between treatment arms in the proportion of all first recurrences that were locoregional:  $> 0.1$ ; NS

**Webfigure 48. Effect of radiotherapy (RT) versus not after mastectomy but no axillary surgery (Mast):** 10 year risks of recurrence during years 0-9, breast cancer mortality, and all-cause mortality in 2904 women with clinically node-negative (cN-) disease. Event rate ratios, one line per trial, trial subdivided according to whether or not radiotherapy was given to the chest wall.

2904 cN- women

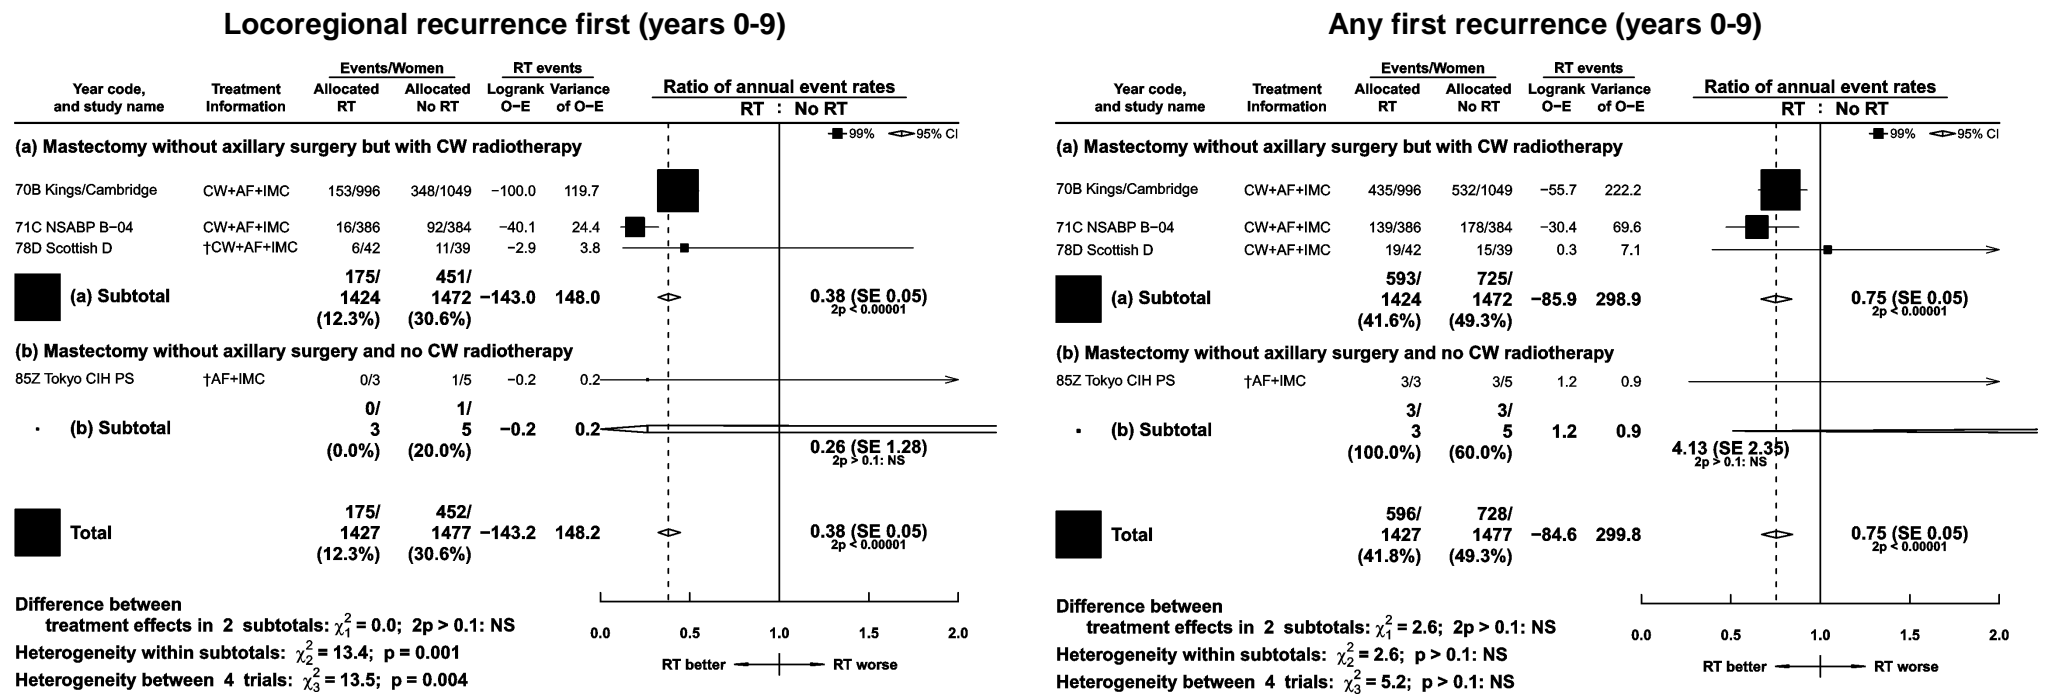

† Same polychemotherapy (cyclophosphamide, methotrexate, and 5-fluorouracil), and/or tamoxifen in both groups.  
Radiotherapy sites: CW=chest wall, AF=Axilla and/or supraclavicular fossa, IMC=Internal mammary chain. Site(s) in brackets were not always treated.

continued overleaf

2904 cN- women

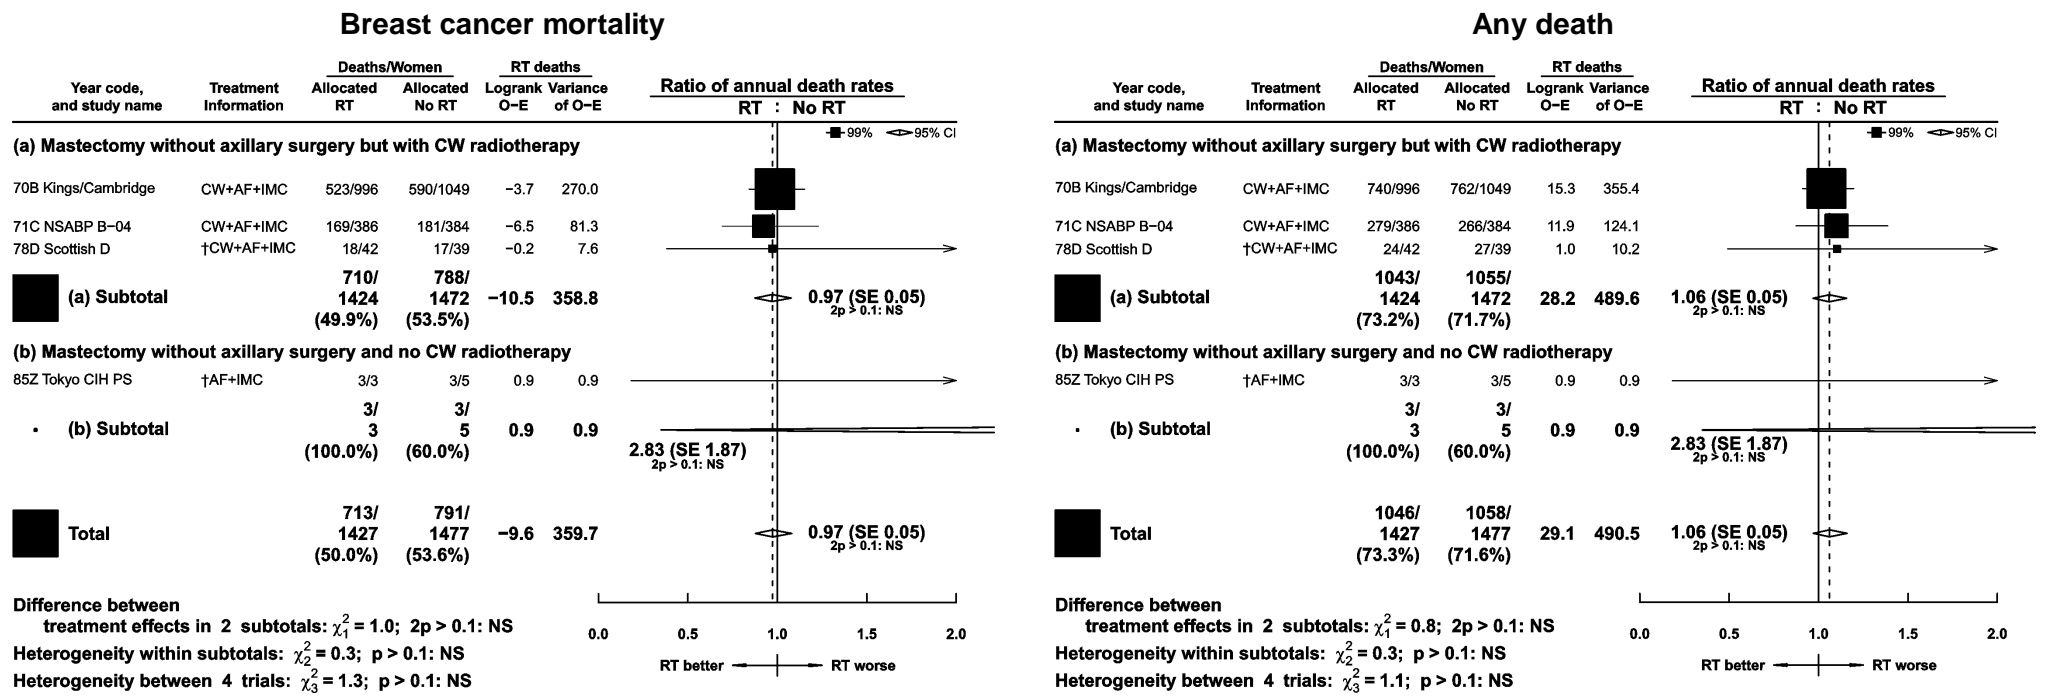

**Webfigure 49. Effect of radiotherapy (RT) versus not after mastectomy but no axillary surgery (Mast):** 10 year risks of recurrence during years 0-9, breast cancer mortality, and all-cause mortality in 1673 women with clinically node-positive (cN+) disease. Event rate ratios, one line per trial, trial subdivided according to whether or not radiotherapy was given to the chest wall.

1673 cN+ women

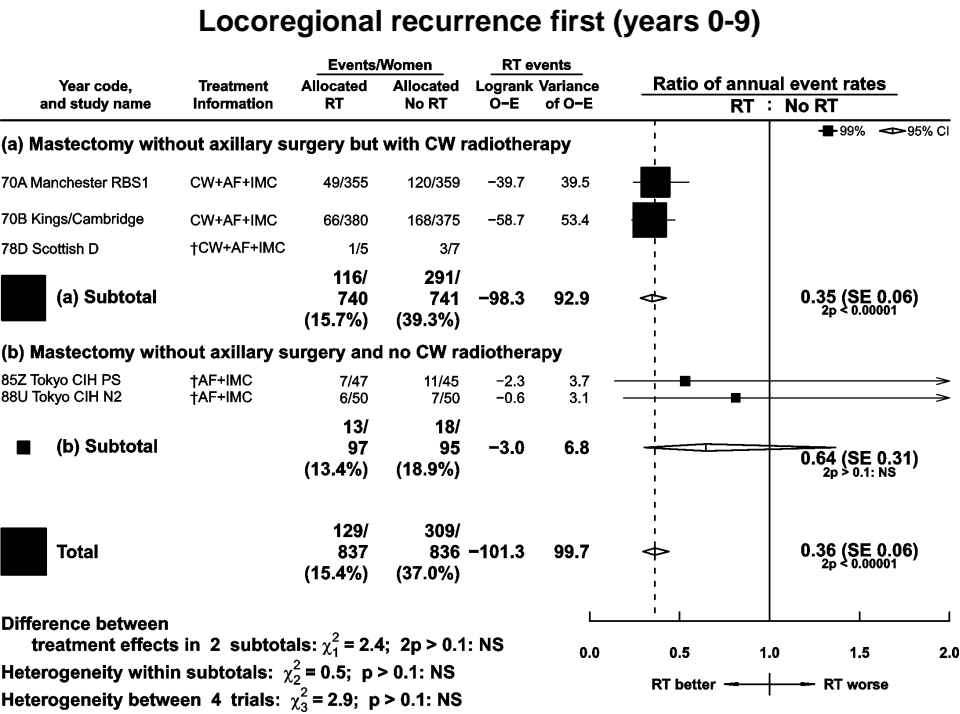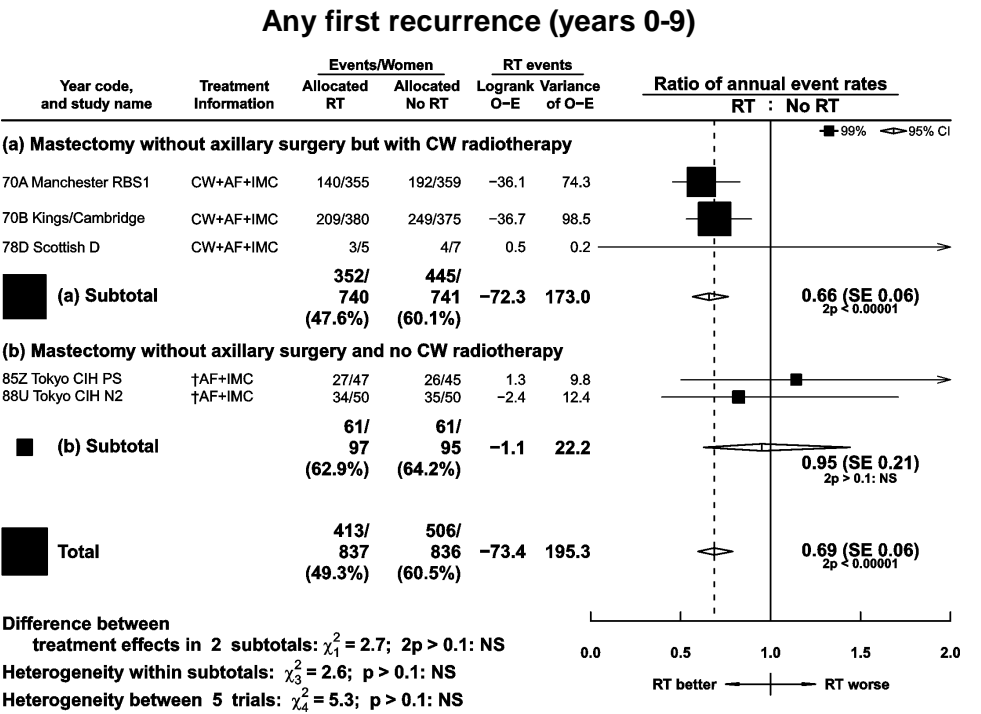

† Same polychemotherapy (cyclophosphamide, methotrexate, and 5-fluorouracil), and/or tamoxifen in both groups.  
Radiotherapy sites: CW=chest wall, AF=Axilla and/or supraclavicular fossa, IMC=Internal mammary chain. Site(s) in brackets were not always treated.

continued overleaf

## 1673 cN+ women

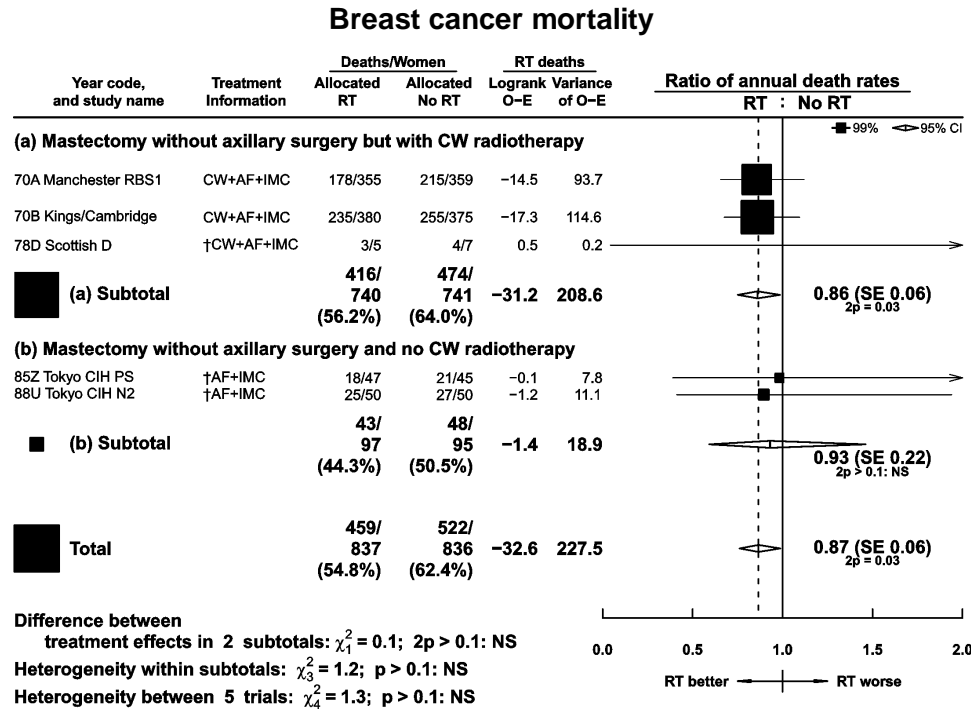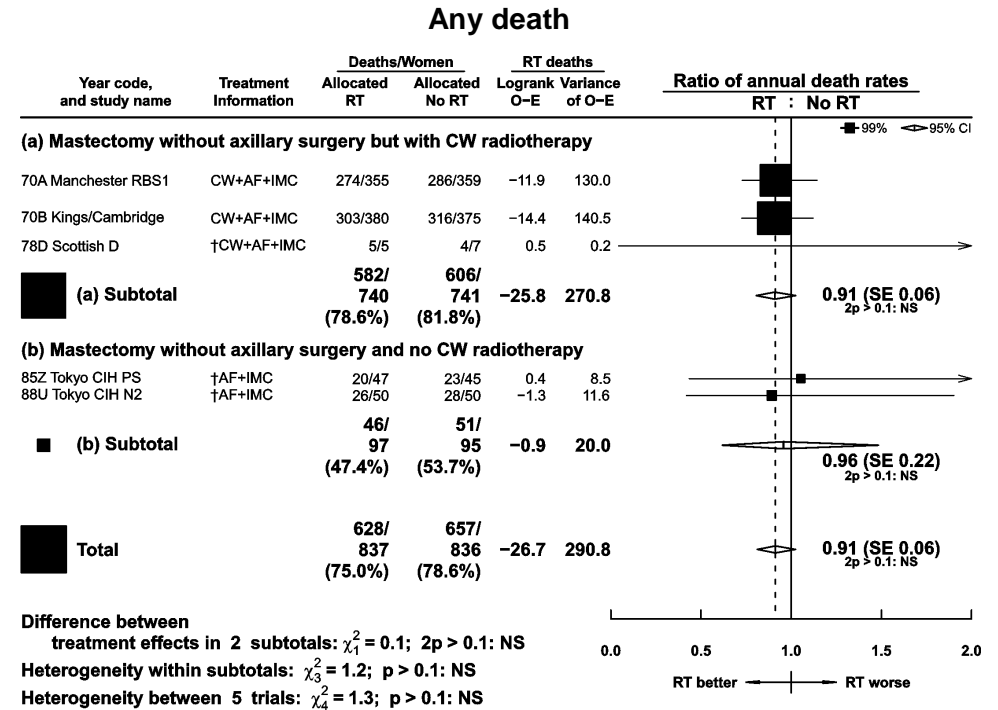

† Same polychemotherapy (cyclophosphamide, methotrexate, and 5-fluorouracil), and/or tamoxifen in both groups. Radiotherapy sites: CW=chest wall, AF=Axilla and/or supraclavicular fossa, IMC=Internal mammary chain. Site(s) in brackets were not always treated.

**Webtable 8. Availability of data from randomised trials beginning before the year 2000 and comparing radiotherapy to the chest wall and regional lymph nodes versus not before mastectomy and axillary dissection (Mast+AD) or axillary sampling (Mast+AS) \*.**

| Nodal status†                             | Women      | Deaths     | Woman-years since diagnosis |                  |                               |            | % women given systemic therapy |               |                    |
|-------------------------------------------|------------|------------|-----------------------------|------------------|-------------------------------|------------|--------------------------------|---------------|--------------------|
|                                           |            |            | Median/<br>woman            | Total<br>('000s) | Distribution by years ('000s) |            |                                | Chemotherapy‡ | ER+ &<br>Tamoxifen |
|                                           |            |            |                             |                  | <10                           | 10-        | 20+                            |               |                    |
| <b>Axillary dissection<br/>pN unknown</b> | <b>255</b> | <b>201</b> | <b>6.6</b>                  | <b>2.0</b>       | <b>1.6</b>                    | <b>0.4</b> | <b>&lt;0.1</b>                 | <b>0</b>      | <b>0</b>           |
| <b>Axillary sampling<br/>pN unknown</b>   | <b>637</b> | <b>497</b> | <b>16.6</b>                 | <b>10.7</b>      | <b>5.1</b>                    | <b>3.4</b> | <b>2.2</b>                     | <b>0</b>      | <b>0</b>           |
| <b>Total</b>                              | <b>892</b> | <b>698</b> | <b>12.1</b>                 | <b>12.7</b>      | <b>6.7</b>                    | <b>3.8</b> | <b>2.2</b>                     | <b>0</b>      | <b>0</b>           |

\*Data available for 2 trials, start dates 1962 to 1971. In all trials radiotherapy was given to the axilla/supraclavicular fossa and the internal mammary chain.. Full details of the trials are given in webtable 9.

† pN unknown: as radiotherapy was given before surgery, to avoid bias pathological nodal status is regarded as unknown.

**Webtable 9. Randomised trials beginning before the year 2000 and comparing radiotherapy to the chest wall and regional lymph nodes versus not before mastectomy and axillary dissection (Mast+AD) or axillary sampling (Mast+AS) – treatment details.**

| Year code and study name | Breast surgery | Axillary Surgery* (number of patients) | Chest wall RT      | Supraclavicular and axillary fossa RT | Internal mammary chain RT | Boost RT to scar | Common systemic chemoendocrine therapy |
|--------------------------|----------------|----------------------------------------|--------------------|---------------------------------------|---------------------------|------------------|----------------------------------------|
| 62B Berlin-Bruch         | RM             | Axillary clearance (255)               | 55 Gy (u Gy/f) c   | 55 Gy (u Gy/f) c                      | 55 Gy (u Gy/f) c          | None             | None                                   |
| 71B Stockholm A          | MRM            | Axillary sampling (637)                | 45 Gy (1.8 Gy/f) e | 45 Gy de (1.8 Gy/f) c                 | 45 Gy (1.8 Gy/f) e        | None             | None                                   |

\* Based on the description of axillary surgery in the trial protocol or publications or on information on individual women. Women were classified as having axillary dissection if they were in a trial where the protocol required removal of axillary lymph nodes in at least Levels I & II or, if individual information was available, resection of  $\geq 10$  nodes. In other trials, women were classified as having axillary dissection if the trial publication indicated that the median number of nodes removed was  $\geq 10$ . c=cobalt-60, e=electron, f=fraction, Gy=Gray (intended dose), MRM=modified radical mastectomy, RM=radical mastectomy (Halsted), RT=radiotherapy, u=unknown,

## References for Webtable 9

| Year code and study name | Reference                                                                                                                                                                                                                                                   |
|--------------------------|-------------------------------------------------------------------------------------------------------------------------------------------------------------------------------------------------------------------------------------------------------------|
| 62B Berlin-Bruch         | Berndt H, Eichhorn HJ, Widow W et al. Ein kontrollierter klinischer Versuch zur Zusatztherapie des operablen Brustdrüsenkrebses mit Vorbestrahlung oder Cyclophosphamid. <i>Arch. Gesch</i> 1980; <b>50</b> : 168-479                                       |
| 71B Stockholm A          | Gyenes G, Rutqvist LE, Liedberg A, Fornander T. Long-term cardiac morbidity and mortality in a randomized trial of pre- and postoperative radiation therapy versus surgery alone in primary breast cancer. <i>Radiother Oncol</i> 1998; <b>48</b> : 185–90. |

**Webfigure 50. Effect of radiotherapy (RT) to the chest wall and regional lymph nodes versus not before mastectomy and axillary dissection (Mast+AD): 10-year risk of locoregional recurrence and recurrence of any type and 15-year risk of breast cancer and all-cause mortality in 255 women with unknown pathological nodal status (pN?) disease. See webfigure 1 for methodological note and also webfigure 51.**

## 255 pN? women with Mast+AD

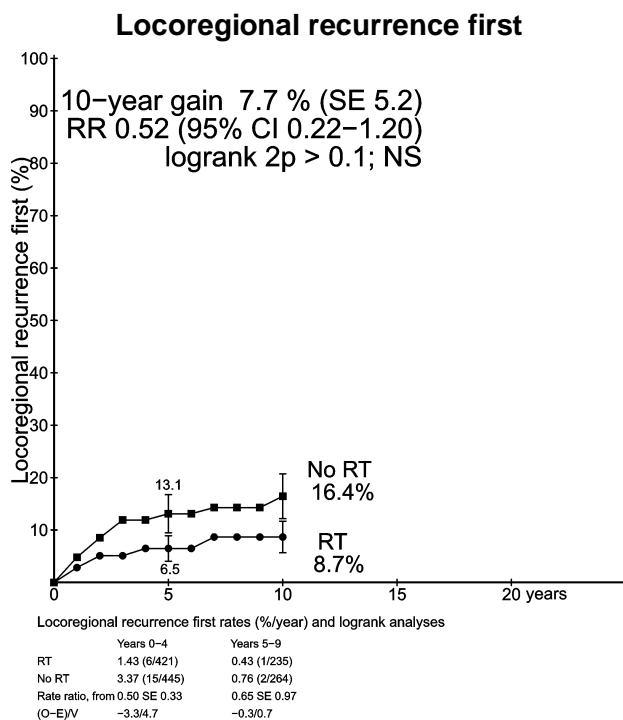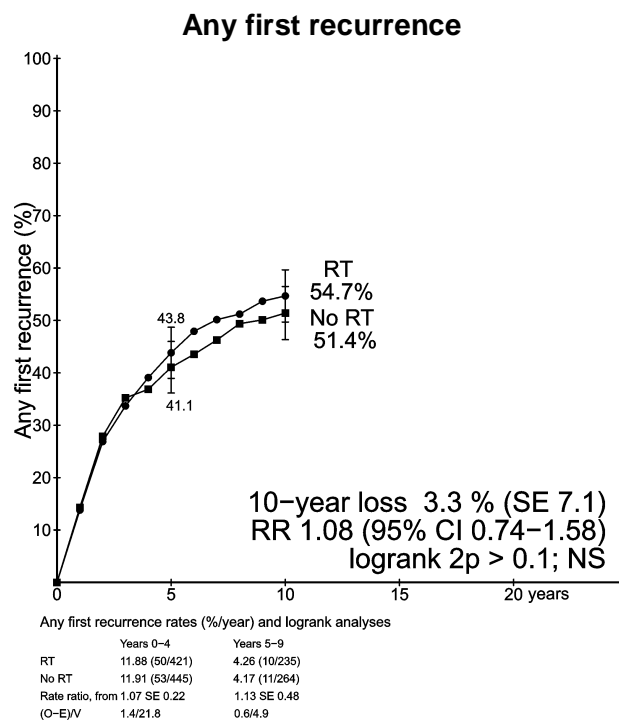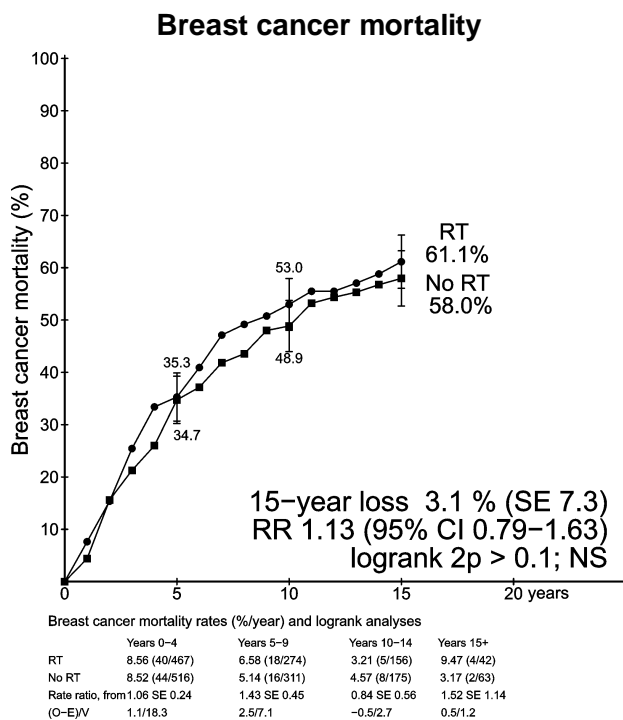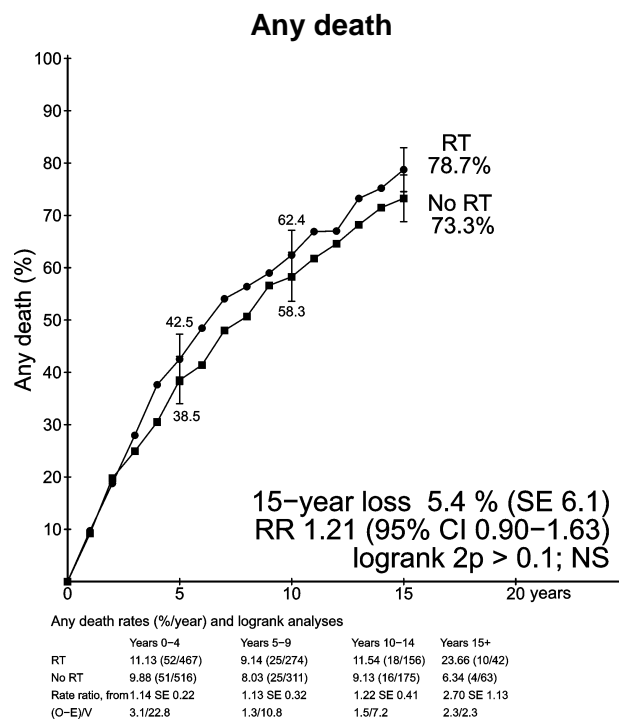

**Webfigure 51. Effect of radiotherapy (RT) to the chest wall and regional lymph nodes versus not before mastectomy and axillary dissection (Mast+AD): 10-year risk of recurrence and type of first recurrence, by allocated treatment, in 255 women with unknown pathological nodal status (pN?).** ( $r_L$  = number of women for whom first recurrence was locoregional,  $r_D$  = number women for whom distant recurrence was first.)

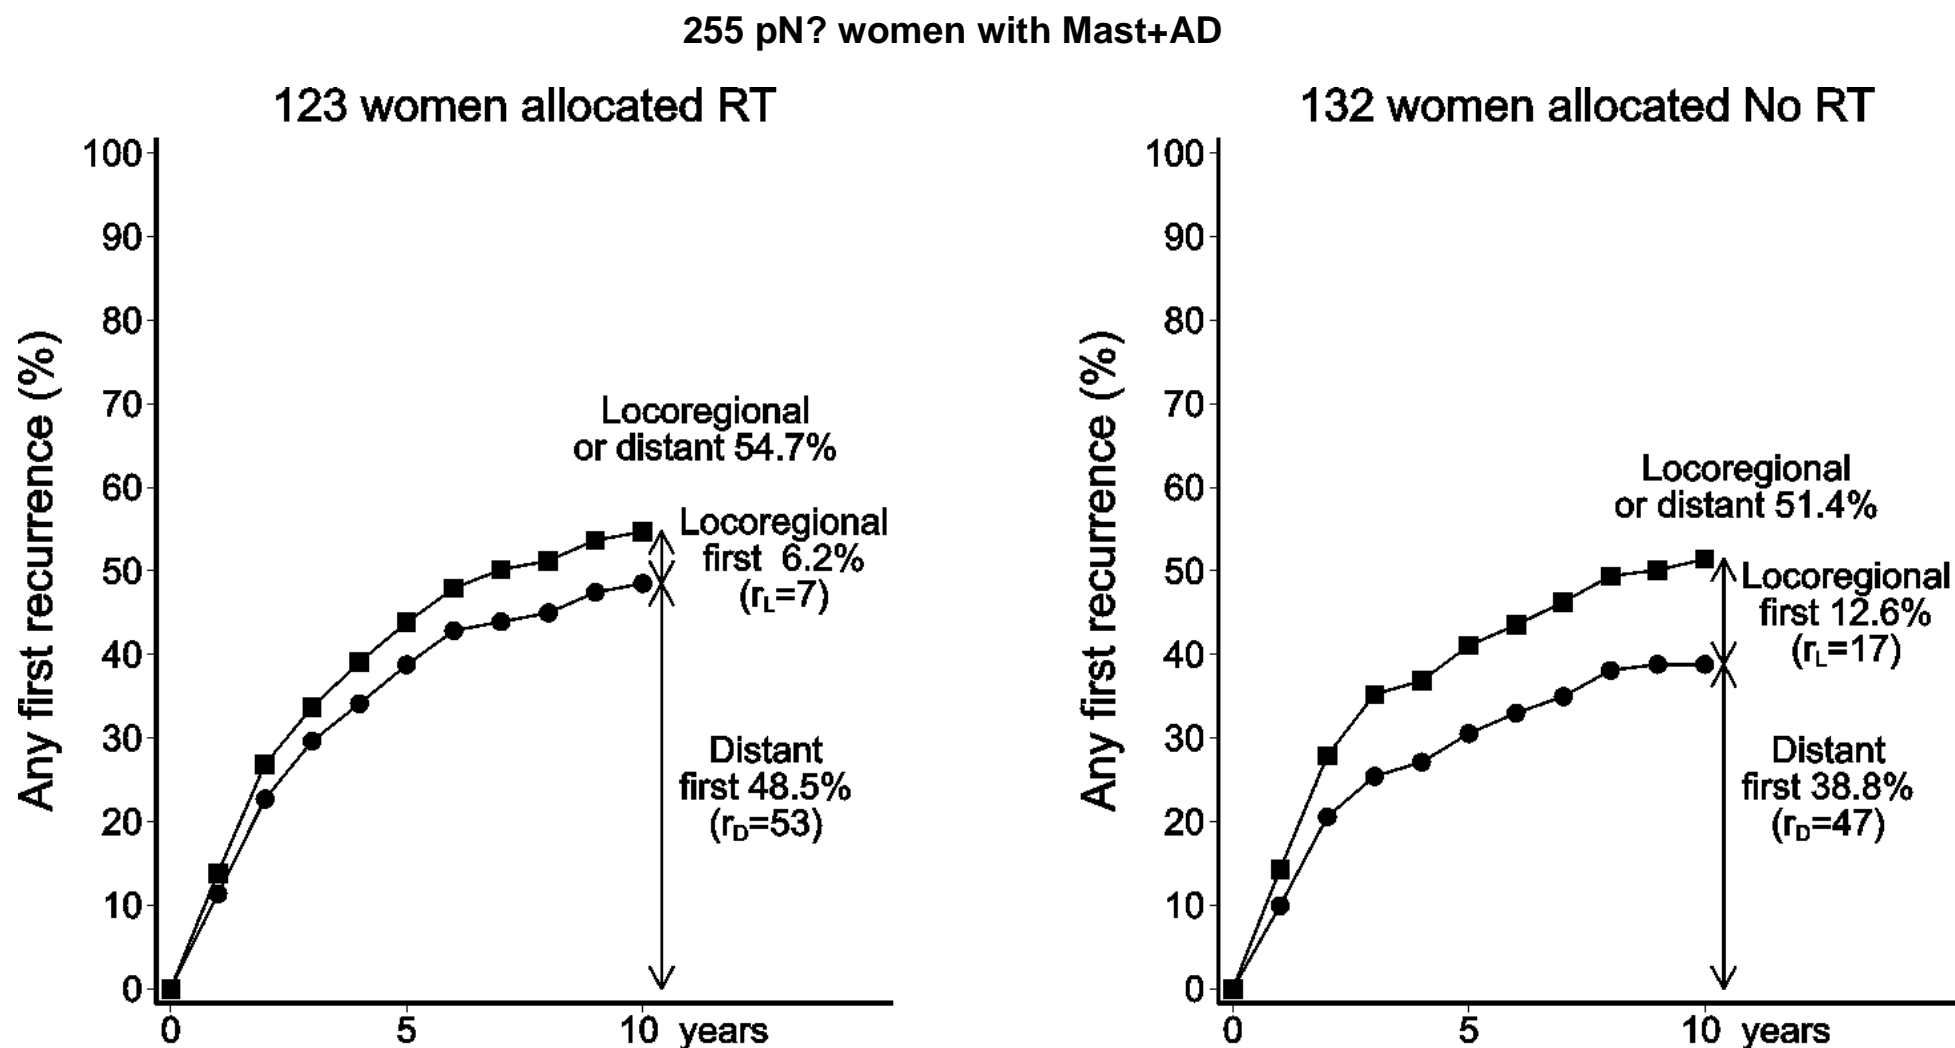

2p for difference between treatment arms in the proportion of all first recurrences that were locoregional: = 0.04

**Webfigure 52. Effect of radiotherapy (RT) to the chest wall and regional lymph nodes versus not before mastectomy and axillary sampling (Mast+AS): 10-year risk of locoregional recurrence and recurrence of any type and 15-year risk of breast cancer and all-cause mortality in 637 women with unknown pathological nodal status (pN?) disease. See webfigure 1 for methodological note and also webfigure 53.**

## 637 pN? women with Mast+AS

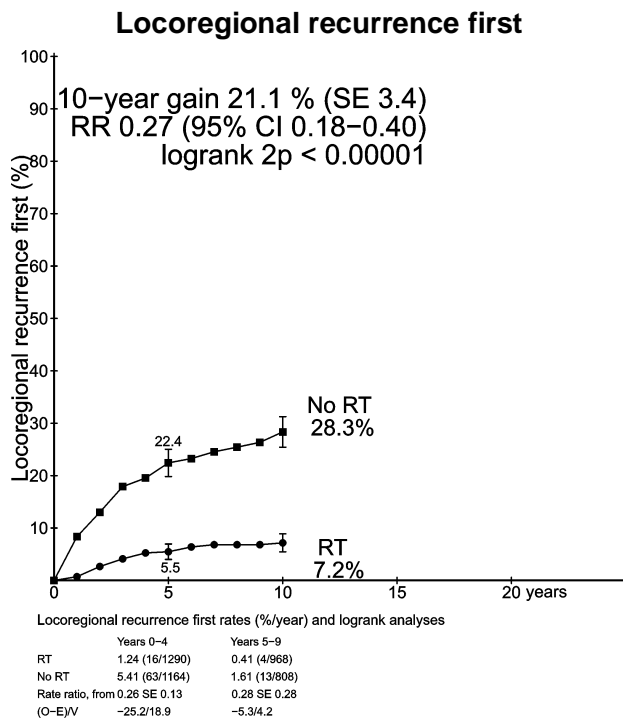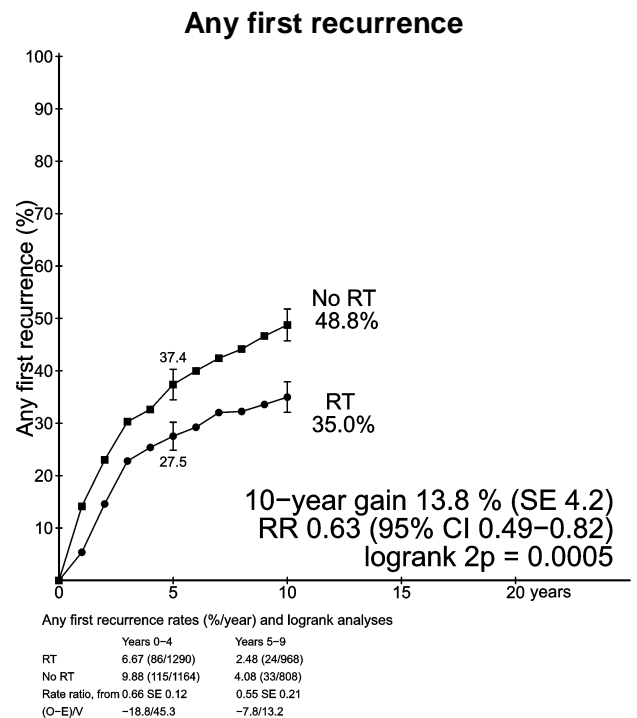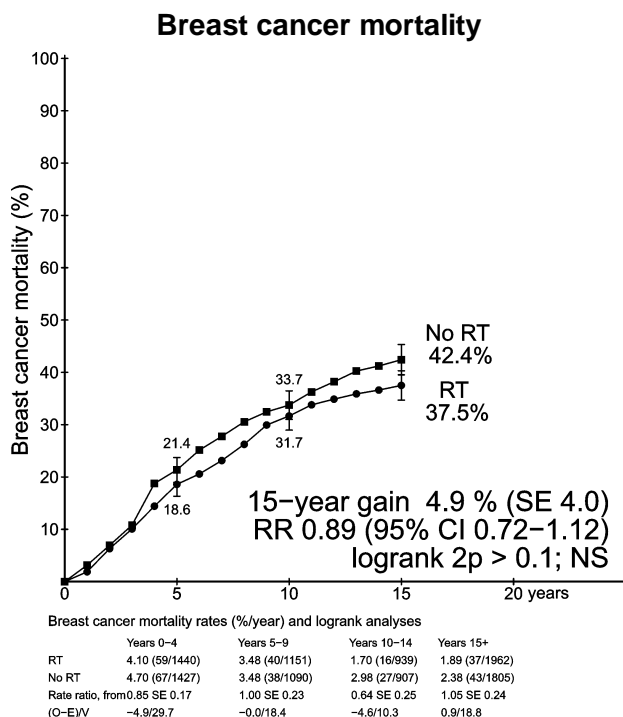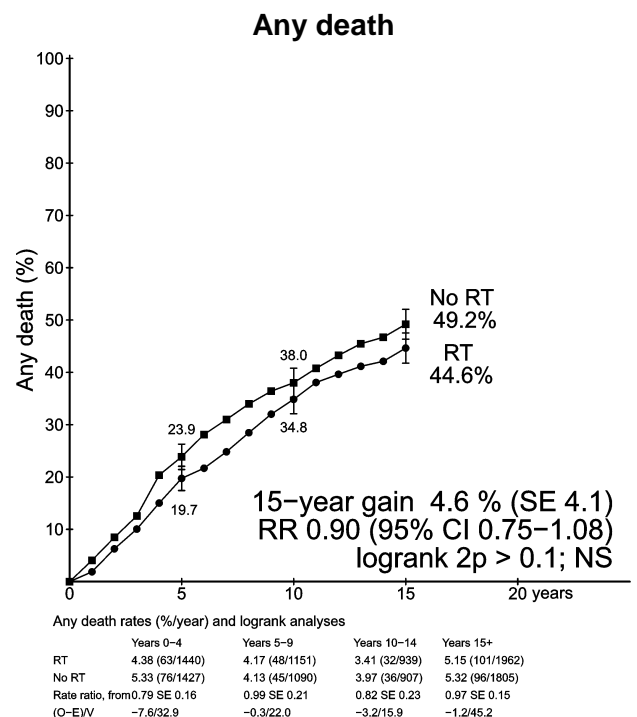

**Webfigure 53. Effect of radiotherapy (RT) to the chest wall and regional lymph nodes versus not before mastectomy and axillary sampling (Mast+AS): 10-year risk of recurrence and type of first recurrence, by allocated treatment, in 637 women with unknown pathological nodal status (pN?).** ( $r_L$  = number of women for whom first recurrence was locoregional,  $r_D$  = number women for whom distant recurrence was first.)

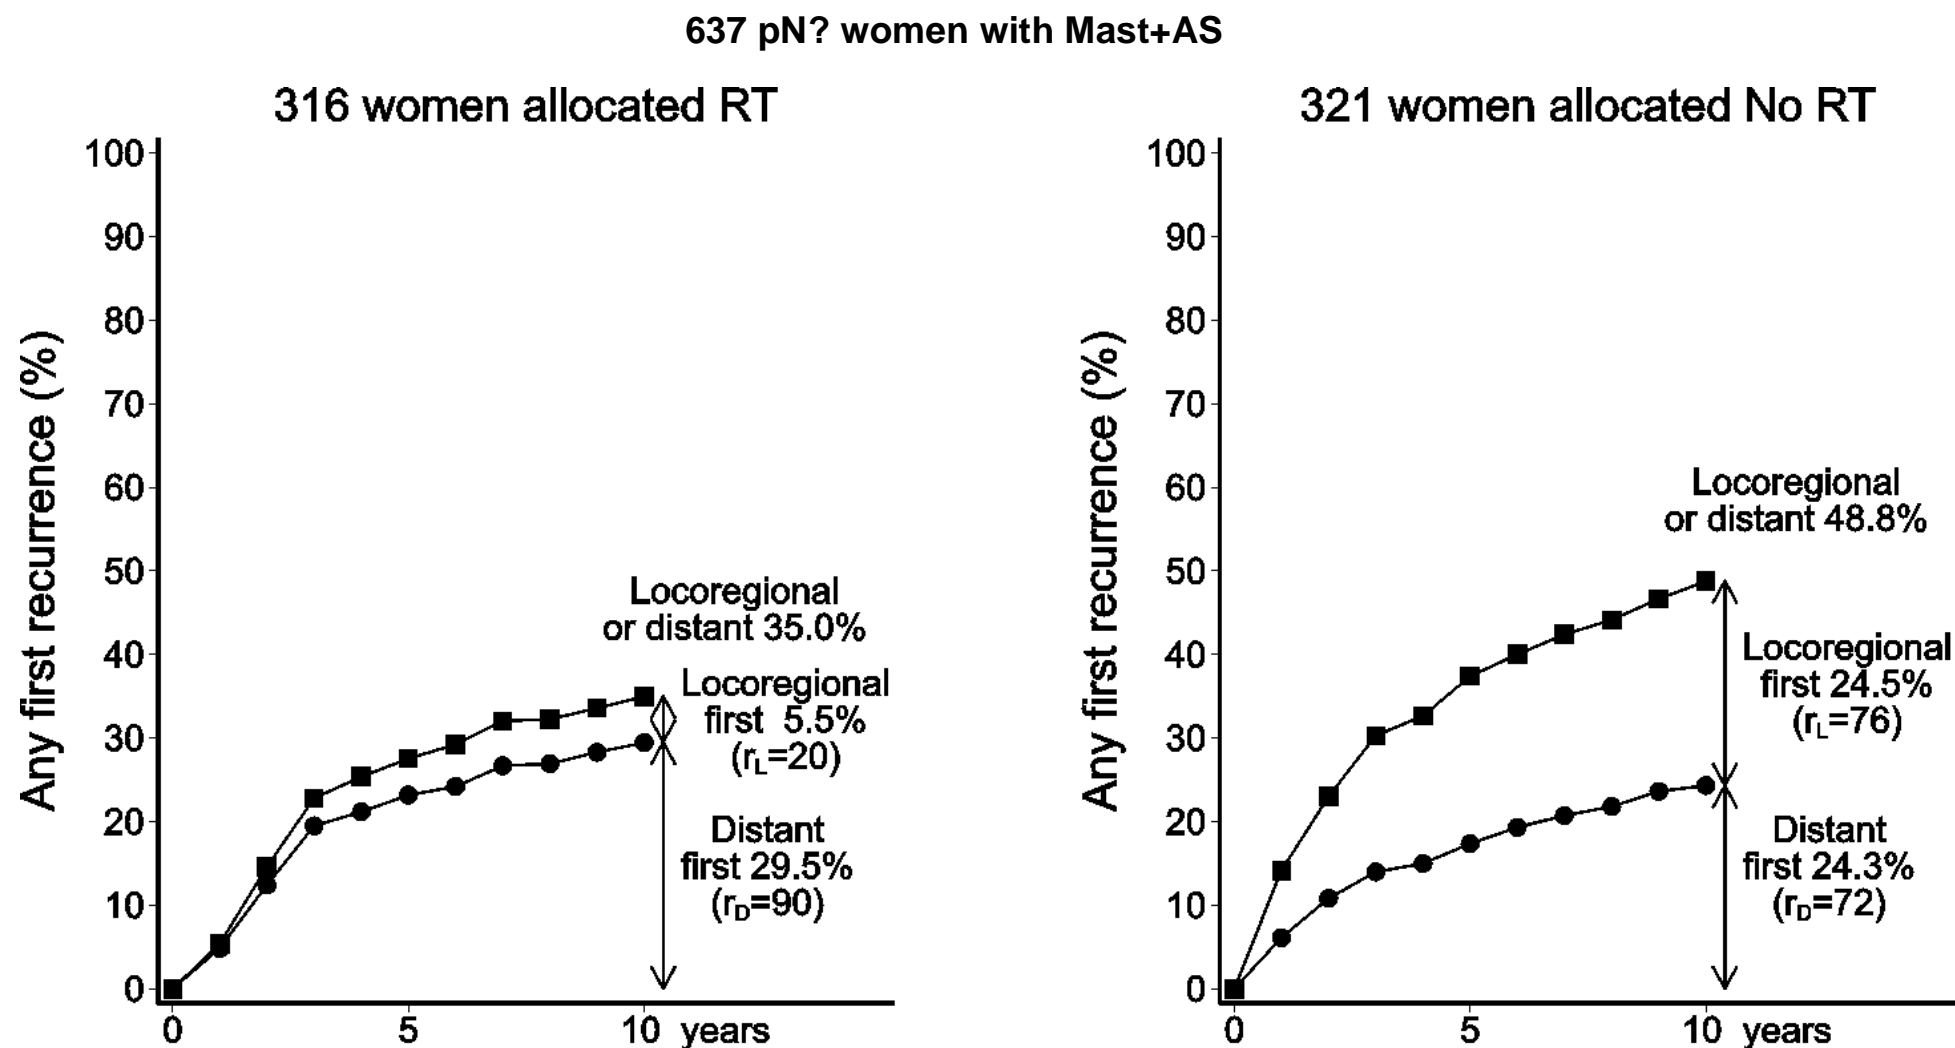

2p for difference between treatment arms in the proportion of all first recurrences that were locoregional: < 0.00001

**Webfigure 54. Effect of radiotherapy (RT) to the chest wall and regional lymph nodes versus not before mastectomy and axillary dissection (Mast+AD) or axillary sampling (Mast+AS):** Event rate ratios, one line per trial, for locoregional recurrence and recurrence of any type during years 0-9 and for breast cancer and all-cause mortality in 892 women with unknown pathological nodal status (pN?).

892 pN? women

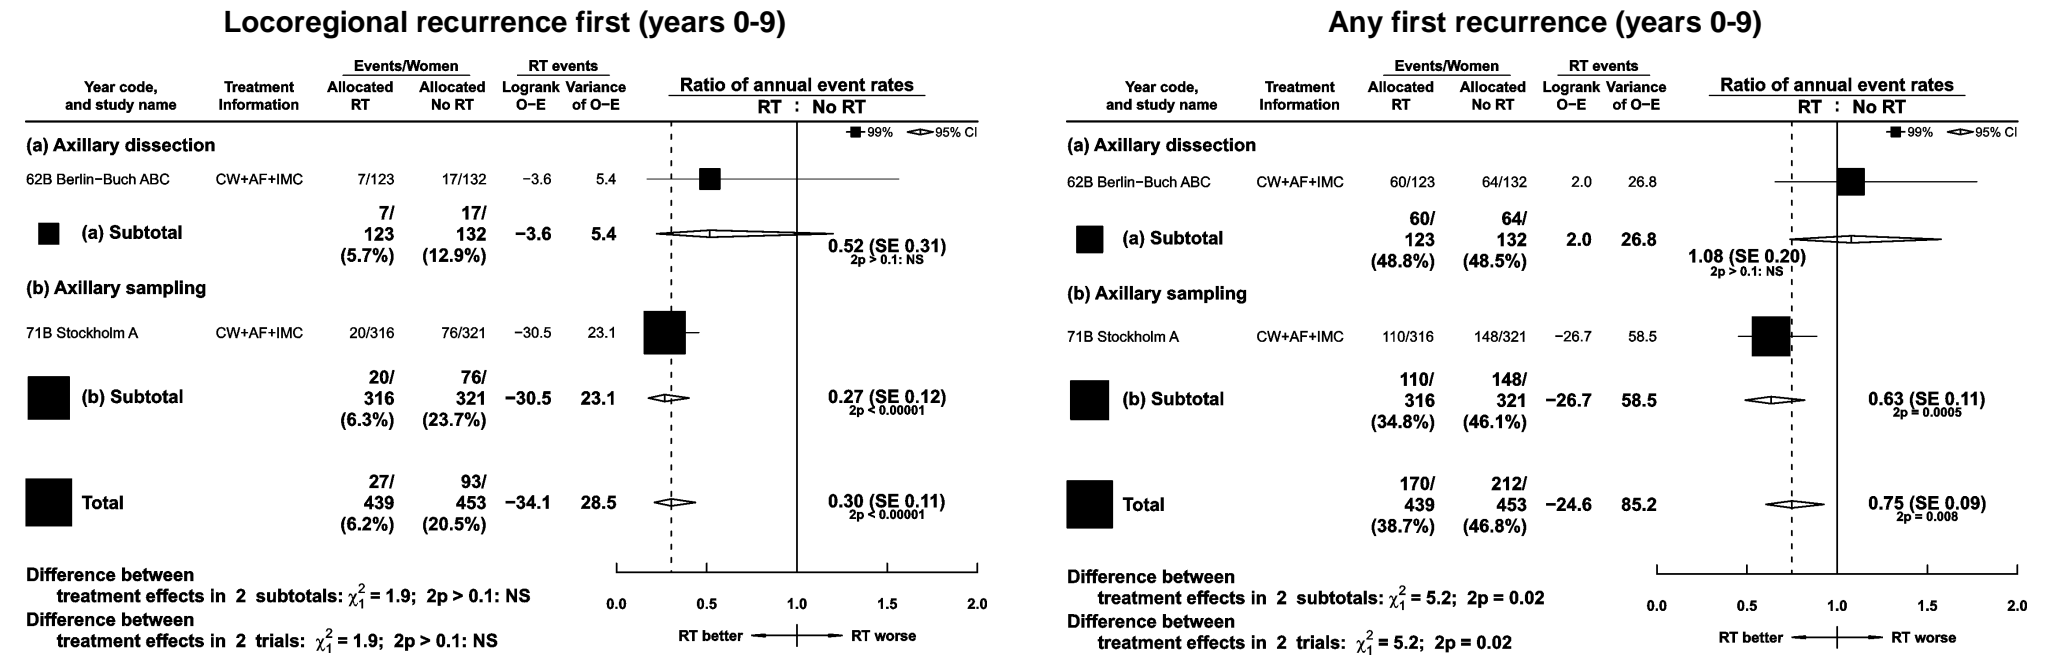

Radiotherapy sites: CW=chest wall, AF=Axilla and/or supraclavicular fossa, IMC=Internal mammary chain.

continued overleaf

892 pN? women

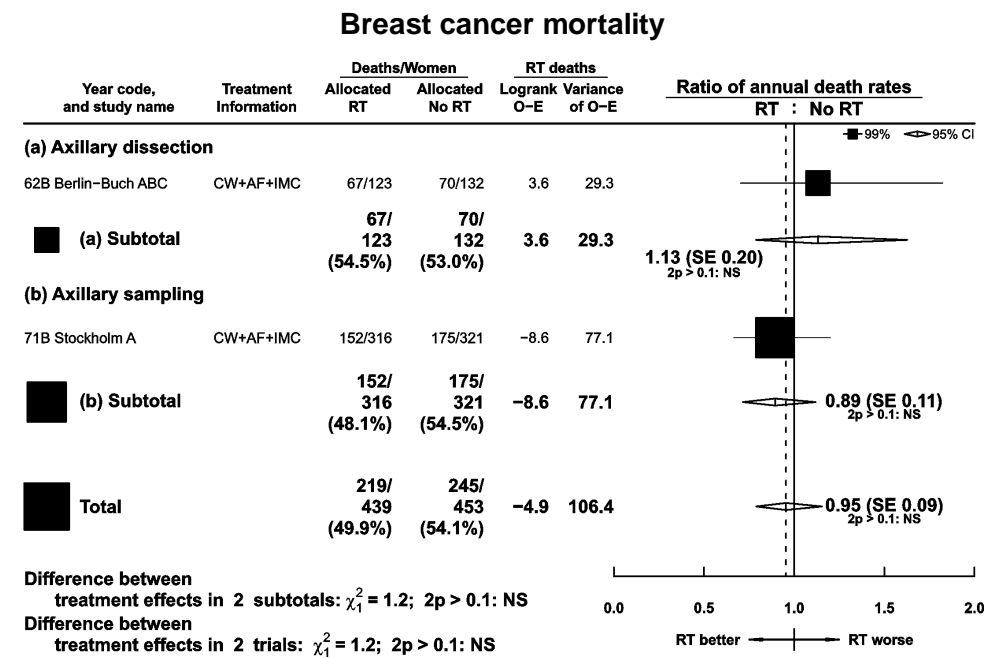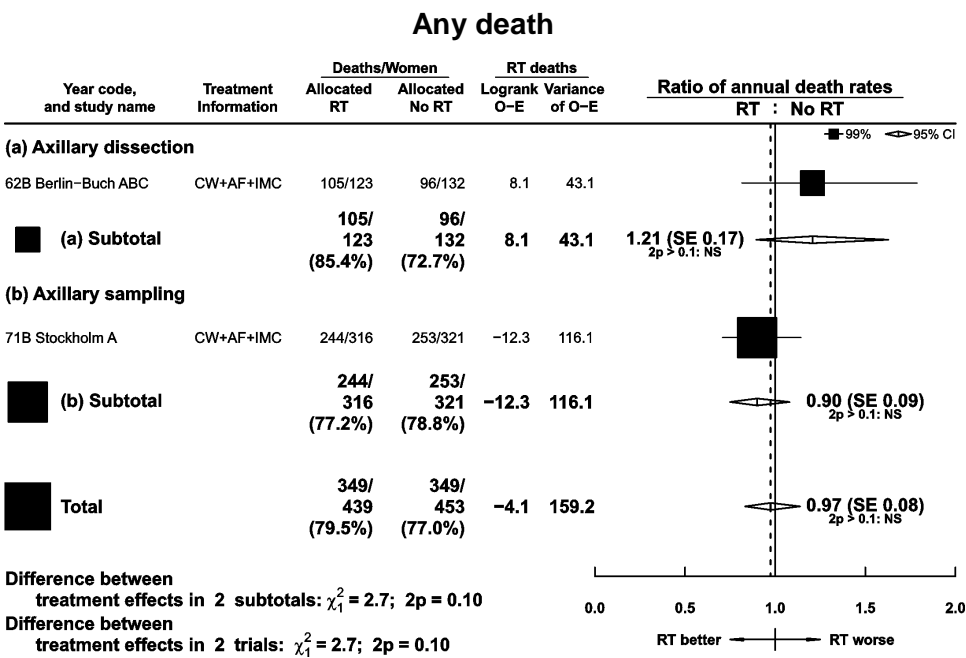

Radiotherapy sites: CW=chest wall, AF=Axilla and/or supraclavicular fossa, IMC=Internal mammary chain.

## **Webfigure 55. EBCTCG collaborators, listed alphabetically by institution and then name**

*ACETBC, Tokyo, Japan*—O Abe, R Abe, K Enomoto, K Kikuchi, H Koyama, H Masuda, Y Nomura, Y Ohashi, K Sakai, K Sugimachi, M Toi, T Tominaga, J Uchino, M Yoshida.

*Addenbrooke's Hospital, Cambridge, UK*—J L Haybittle.

*Anglo-Celtic Cooperative Oncology Group, UK*—C F Leonard.

*ARCOSEIN Group, France*—G Calais, P Geraud.

*ATLAS Trial Collaborative Study Group, Oxford, UK*—V Collett, C Davies, A Delmestri, J Sayer.

*Auckland Breast Cancer Study Group, New Zealand*—V J Harvey, I M Holdaway, R G Kay, B H Mason.

*Australian New Zealand Breast Cancer Trials Group, Sydney, Australia*—J F Forbes, N Wilcken.

*Austrian Breast Cancer Study Group, Vienna, Austria*—R Bartsch, P Dubsy, C Fesl, H Fohler, M Gnant, R Greil, R Jakesz, A Lang, G Luschin-Ebengreuth, C Marth, B Mlineritsch, H Samonigg, C F Singer, G G Steger, H Stöger.

*Beatson Oncology Centre, Glasgow, UK*—P Canney, H M A Yosef.

*Belgian Adjuvant Breast Cancer Project, Liège, Belgium*—C Focan.

*Berlin-Buch Akademie der Wissenschaften, Germany*—U Peek.

*Birmingham General Hospital, UK*—G D Oates, J Powell.

*Bordeaux Institut Bergonié, France*—M Durand, L Mauriac.

*Bordet Institute, Brussels, Belgium*—A Di Leo, S Dolci, D Larsimont, J M Nogaret, C Philippson, M J Piccart.

*Bradford Royal Infirmary, UK*—M B Masood, D Parker, J J Price.

*Breast Cancer International Research Group (BCIRG)*—M A Lindsay, J Mackey, M Martin.

*Breast Cancer Study Group of the Comprehensive Cancer Centre, Limburg, Netherlands*—P S G J Hupperets.

*British Association of Surgical Oncology BASO II Trialists, London, UK*—T Bates, R W Blamey, U Chetty, I O Ellis, E Mallon, D A L Morgan, J Patnick, S Pinder.

*British Columbia Cancer Agency, Vancouver, Canada*—I Olivotto, J Ragaz.

*Cancer and Leukemia Group B, Washington DC, USA*—D Berry, G Broadwater, C Cirincione, H Muss, L Norton, R B Weiss.

*Cancer Care Ontario, Canada*—H T Abu-Zahra.

*Cancer Research Centre of the Russian Academy of Medical Sciences, Moscow, Russia*—S M Portnoj.

*Cancer Research UK Clinical Trials Unit (CRCTU), NCRI, Birmingham, UK*—S Bowden, C Brookes, J Dunn, I Fernando, M Lee, C Poole, D Rea, D Spooner.

*Cardiff Trialists Group, UK*—P J Barrett-Lee, R E Mansel, I J Monypenny.

*Case Western Reserve University, Cleveland, OH, USA*—N H Gordon.

*Central Oncology Group, Milwaukee, WI, USA*—H L Davis.

*Centre for Cancer Prevention, Wolfson Institute of Preventive Medicine, Queen Mary, University of London, UK*—J Cuzick.

*Centre Léon-Bérard, Lyon, France*—Y Lehingue, P Romestaing.

*Centre Paul Lamarque, Montpellier, France*—J B Dubois.

*Centre Régional François Baclesse, Caen, France*—T Delozier, B Griffon, J Mace Lesech.

*Centre René Huguenin, Paris, St Cloud, France*—E Brain, B de La Lande, E Mouret-Fourme.

*Centro Oncologico, Trieste, Italy*—G Mustacchi.

*Charles University in Prague, First Faculty of Medicine, Department of Oncology of the First Faculty of Medicine and General Teaching Hospital, Czech Republic*—L Petruzelka, O Pribylova.

*Cheltenham General Hospital, UK*—J R Owen.

*Chemo N0 Trial Group, Germany*—N Harbeck, F Jänicke, C Meisner, M Schmitt, C Thomssen.

*Chicago University, IL, USA*—P Meier.

*Chinese Academy of Medical Sciences, Beijing, People's Republic of China (in collaboration with the Oxford CTSU)*—Y Shan, Y F Shao, X Wang, D B Zhao (CTSU: Z M Chen, H C Pan).

*Christie Hospital and Holt Radium Institute, Manchester, UK*—A Howell, R Swindell.

*Clinical Trial Service Unit, Oxford, UK (ie, EBCTCG Secretariat)*—J A Burrett, M Clarke, R Collins, C Correa, D Cutter, S Darby, C Davies, K Davies, A Delmestri, P Elphinstone, V Evans, L Gettins, J Godwin, R Gray, C Gregory, D Hermans, C Hicks, S James, A Kerr, H Liu, E MacKinnon, M Lay, P McGale, T McHugh, P Morris, H C Pan, R Peto, J Sayer, C Taylor, Y Wang.

*Coimbra Instituto de Oncologia, Portugal*—J Albano, C F de Oliveira, H Gervásio, J Gordilho.

*Copenhagen Breast Cancer Trials, Copenhagen, Denmark*—B Ejlersen, M-B Jensen, H Johansen, H Mouridsen, T Palshof.

*Dana-Farber Cancer Institute, Boston, MA, USA*—R S Gelman, J R Harris, D Hayes, C Henderson, C L Shapiro, E Winer.

*Danish Breast Cancer Cooperative Group, Copenhagen, Denmark*—P Christiansen, B Ejlersen, M

Ewertz, M-B Jensen, S Møller, H T Mouridsen.  
*Düsseldorf University, Germany*—H J Trampisch.  
*Dutch Working Party for Autologous Bone Marrow Transplant in Solid Tumours, Amsterdam & Groningen, Netherlands*—O Dalesio, E G E de Vries, S Rodenhuis, H van Tinteren.  
*Eastern Cooperative Oncology Group, Boston, MA, USA*—R L Comis, N E Davidson, R Gray, N Robert, G Sledge, L J Solin, J A Sparano, D C Tormey, W Wood.  
*Edinburgh Breast Unit, UK*—D Cameron, U Chetty, J M Dixon, P Forrest, W Jack, I Kunkler.  
*Elim Hospital, Hamburg, Germany*—J Rossbach.  
*Erasmus MC/Daniel den Hoed Cancer Center, Rotterdam, Netherlands*—J G M Klijn, A D Treurniet-Donker, W L J van Putten.  
*European Institute of Oncology, Milan, Italy*—N Rotmensz, U Veronesi, G Viale.  
*European Organization for Research and Treatment of Cancer, Brussels, Belgium*—H Bartelink, N Bijker, J Bogaerts, F Cardoso, T Cufer, J P Julien, E Rutgers, C J H van de Velde.  
*Evanston Hospital, IL, USA*—M P Cunningham.  
*Finnish Breast Cancer Group, Finland*—R Huovinen, H Joensuu.  
*Fondazione Maugeri Pavia, Italy*—A Costa.  
*Fondazione Michelangelo, Milan, Italy*—G Bonadonna, L Gianni, P Valagussa.  
*Fox Chase Cancer Center, Philadelphia, PA, USA*—L J Goldstein.  
*French Adjuvant Study Group (GFEA), Guyancourt, France*—J Bonnetterre, P Fargeot, P Fumoleau, P Kerbrat, E Luporsi, M Namer.  
*German Adjuvant Breast Group (GABG), Frankfurt, Germany*—W Eiermann, J Hilfrich, W Jonat, M Kaufmann, R Kreienberg, M Schumacher.  
*German Breast Cancer Study Group (BMFT), Freiburg, Germany*—G Bastert, H Rauschecker, R Sauer, W Sauerbrei, A Schauer, M Schumacher.  
*German Breast Group (GBG), Neu-Isenburg, Germany*—J U Blohmer, S D Costa, H Eidtmann, B Gerber, C Jackisch, S Loibl, G von Minckwitz.  
*Ghent University Hospital, Belgium*—A de Schryver, L Vakaet.  
*GIVIO Interdisciplinary Group for Cancer Care Evaluation, Chieti, Italy*—M Belfiglio, A Nicolucci, F Pellegrini, M C Pirozzoli, M Sacco, M Valentini.  
*Glasgow Victoria Infirmary, UK*—C S McArdle, D C Smith, S Stallard.  
*Groote Schuur Hospital, Cape Town, South Africa*—D M Dent, C A Gudgeon, A Hacking, E Murray, E Panieri, ID Werner.  
*Grupo Español de Investigación en Cáncer de Mama (GEICAM), Spain*—E Carrasco, M Martin, M A Segui.  
*Gruppo Oncologico Clinico Cooperativo del Nord Est, Aviano, Italy*—E Galligioni.  
*Gruppo Oncologico Dell'Italia Meridionale (GOIM), Rome, Italy*—M Lopez.  
*Guadalajara Hospital de 20 Noviembre, Mexico*—A Erazo, J Y Medina.  
*Gunma University, Japan*—J Horiguchi, H Takei.  
*Guy's Hospital, London, UK*—I S Fentiman, J L Hayward, R D Rubens, D Skilton.  
*Heidelberg University I, Germany*—H Scheurlen.  
*Heidelberg University II, Germany*—M Kaufmann, H C Sohn.  
*Helios Klinikum Berlin-Buch, Germany*—M Untch.  
*Hellenic Breast Surgeons Society, Greece*—U Dafni, C Markopoulos.  
*Hellenic Cooperative Oncology Group, Athens, Greece*—U Dafni, G Fountzilas.  
*Hellenic Oncology Research Group, Greece*—D Mavroudis.  
*Helsinki Deaconess Medical Centre, Finland*—P Klefstrom.  
*Helsinki University, Finland*—C Blomqvist, T Saarto.  
*Hospital del Mar, Barcelona, Spain*—M Gallen.  
*Humanitas Cancer Center, Milan, Italy*—C Tinterri.  
*Innsbruck University, Austria*—R Margreiter.  
*Institut Claudius Regaud, Toulouse, France*—B de Lafontan, J Mihura, H Roché.  
*Institut Curie, Paris, France*—B Asselain, R J Salmon, J R Vilcoq.  
*Institut Gustave-Roussy, Paris, France*—F André, R Arriagada, S Delaloge, C Hill, S Koscielny, S Michiels, C Rubino.  
*Institute of Cancer Research Clinical Trials and Statistics Unit (ICR-CTSU, NCRI), UK*—R A'Hern, J Bliss, P Ellis, L Kilburn, J R Yarnold.  
*Integraal Kankercentrum, Amsterdam, Netherlands*—J Benraadt, M Kooi, A O van de Velde, J A van Dongen, J B Vermorken.  
*International Breast Cancer Study Group (IBCSG), Bern, Switzerland*—M Castiglione, A Coates, M Colleoni, J Collins, J Forbes, R D Gelber, A Goldhirsch, J Lindtner, K N Price, M M Regan, C M Rudenstam, H J Senn, B Thuerlimann.

*International Collaborative Cancer Group, Charing Cross Hospital, London, UK—J M Bliss, C E D Chilvers, R C Coombes, E Hall, M Marty.*

*International Drug Development Institute, Louvain-la-Neuve, Belgium—M Buyse.*

*International TABLE Study Group, Berlin, Germany—K Possinger, P Schmid, M Untch, D Wallwiener.*

*ISD Cancer Clinical Trials Team (incorporating the former Scottish Cancer Therapy Network), Edinburgh, UK—L Foster, W D George, H J Stewart, P Stroner.*

*Israel NSABC, Tel Aviv, Israel—R Borovik, H Hayat, M J Inbar, T Peretz, E Robinson.*

*Istituto Nazionale per la Ricerca sul Cancro, Genova, Italy—P Bruzzi, L Del Mastro, P Pronzato, M R Sertoli, M Venturini.*

*Istituto Nazionale per lo Studio e la Cura dei Tumori, Milan, Italy—T Camerini, G De Palo, M G Di Mauro, F Formelli, P Valagussa.*

*Istituto Oncologico Romagnolo, Forli, Italy—D Amadori.*

*Italian Cooperative Chemo-Radio-Surgical Group, Bologna, Italy—A Martoni, F Pannuti.*

*Italian Oncology Group for Clinical Research (GOIRC), Parma, Italy—R Camisa, G Cocconi, A Colozza, R Passalacqua.*

*Japan Clinical Oncology Group—Breast Cancer Study Group, Matsuyama, Japan—K Aogi, S Takashima.*

*Japanese Foundation for Multidisciplinary Treatment of Cancer, Tokyo, Japan—O Abe, T Ikeda, K Inokuchi, K Kikuchi, K Sawa.*

*Kawasaki Medical School, Japan—H Sonoo.*

*Krakow Institute of Oncology, Poland—S Korzeniowski, J Skolyszewski.*

*Kumamoto University Group, Japan—M Ogawa, J Yamashita.*

*Leiden University Medical Center, Netherlands—E Bastiaannet, C J H van de Velde, W van de Water, J G H van Nes.*

*Leuven Akademisch Ziekenhuis, Gasthuisberg, Belgium—R Christiaens, P Neven, R Paridaens, W Van den Bogaert.*

*Ludwig-Maximilians University, Munich, Germany—S Braun.*

*Marseille Laboratoire de Cancérologie Biologique APM, France—P Martin, S Romain.*

*Medical University Vienna – General Hospital - Department of Obstetrics and Gynaecology and Department of Medicine I, Vienna, Austria—M Janauer, M Seifert, P Sevela, C C Zielinski.*

*Memorial Sloan-Kettering Cancer Center, New York, NY, USA—T Hakes, C A Hudis, L Norton, R Wittes.*

*Metaxas Memorial Cancer Hospital, Athens, Greece—G Giokas, D Kondylis, B Lissaios.*

*Mexican National Medical Center, Mexico City, Mexico—R de la Huerta, M G Sainz.*

*National Cancer Institute, Bethesda, MD, USA—R Altemus, K Camphausen, K Cowan, D Danforth, A Lichter, M Lippman, J O'Shaughnessy, L J Pierce, S Steinberg, D Venzon, J A Zujewski.*

*National Cancer Institute of Bari, Italy—C D'Amico, M Lioce, A Paradiso.*

*NCIC Clinical Trials Group, Kingston, Ontario, Canada—J-A W Chapman, K Gelmon, P E Goss, M N Levine, R Meyer, W Parulekar, J L Pater, K I Pritchard, L E Shepherd, D Tu, T Whelan.*

*National Kyushu Cancer Center, Japan—Y Nomura, S Ohno.*

*National Surgical Adjuvant Breast and Bowel Project (NSABP), Pittsburgh, PA, USA—S Anderson, G Bass, A Brown (deceased), J Bryant (deceased), J Costantino, J Dignam, B Fisher, C Geyer, E P Mamounas, S Paik, C Redmond, S Swain, L Wickerham, N Wolmark.*

*Nolvadex Adjuvant Trial Organisation, London, UK—M Baum, I M Jackson (deceased), M K Palmer.*

*North Central Cancer Treatment Group, Mayo Clinic, Rochester, MN, USA—E Perez, J N Ingle, V J Suman.*

*North Sweden Breast Cancer Group, Umeå, Sweden—N O Bengtsson, S Emdin, H Jonsson.*

*North-West Oncology Group (GONO), Italy—L Del Mastro, M Venturini.*

*North-Western British Surgeons, Manchester, UK—J P Lythgoe, R Swindell.*

*Northwick Park Hospital, London, UK—M Kissin.*

*Norwegian Breast Cancer Group, Oslo, Norway—B Erikstein, E Hannisdal, A B Jacobsen, J E Varhaug.*

*Norwegian Radium Hospital, Oslo, Norway—B Erikstein, S Gundersen, M Hauer-Jensen, H Høst, A B Jacobsen, R Nissen-Meyer, K Reinertsen.*

*Nottingham City Hospital, UK—R W Blamey, A K Mitchell, D A L Morgan, J F R Robertson.*

*Oita Prefectural Hospital, Japan—H Ueo.*

*Oncofrance, Paris, France—M Di Palma, G Mathé (deceased), J L Misset.*

*Ontario Clinical Oncology Group, Hamilton, Canada—M Levine, K I Pritchard, T Whelan.*

*Osaka City University, Japan—K Morimoto.*

*Osaka National Hospital, Japan—K Sawa, Y Takatsuka.*

*Oxford Radcliffe Hospitals NHS Trust, Churchill Hospital, Oxford, UK—E Crossley, A Harris, D Talbot, M Taylor.*

*Parma Hospital, Italy—G Cocconi, B di Blasio.*

*Petrov Research Institute of Oncology, St Petersburg, Russia—V Ivanov, R Paltuev, V Semiglazov.*  
*Piedmont Oncology Association, Winston-Salem, NC, USA—J Brockschmidt, M R Cooper.*  
*Pretoria University, South Africa—C I Falkson.*  
*Royal Marsden NHS Trust, London and Sutton, UK—R A'Hern, M Dowsett, A Makris, M Parton, K Pennert, T J Powles, I E Smith, J R Yarnold.*  
*St George's Hospital, London, UK—J C Gazet.*  
*St George Hospital, Sydney, Australia—L Browne, P Graham.*  
*St Luke's Hospital, Dublin, Ireland—N Corcoran.*  
*Sardinia Oncology Hospital A Businico, Cagliari, Sardinia—N Deshpande, L di Martino.*  
*SASIB International Trialists, Cape Town, South Africa—P Douglas, A Hacking, H Høst, A Lindtner, G Notter.*  
*Saskatchewan Cancer Foundation, Regina, Canada—A J S Bryant, G H Ewing, L A Firth, J L Krushen-Kosloski.*  
*Scandinavian Adjuvant Chemotherapy Study Group, Oslo, Norway—R Nissen-Meyer.*  
*South Sweden Breast Cancer Group, Lund, Sweden—H Anderson, F Killander, P Malmström, L Rydén.*  
*South-East Sweden Breast Cancer Group, Linköping, Sweden—L-G Arnesson, J Carstensen, M Dufmats, H Fohlin, B Nordenskjöld, M Söderberg.*  
*South-Eastern Cancer Study Group and Alabama Breast Cancer Project, Birmingham, AL, USA—J T Carpenter.*  
*Southampton Oncology Centre, UK—N Murray, G T Royle, P D Simmonds.*  
*Southwest Oncology Group, San Antonio, TX, USA—K Albain, W Barlow, J Crowley, D Hayes, J Gralow, G Hortobagyi, R Livingston, S Martino, C K Osborne, P M Ravdin.*  
*Stockholm Breast Cancer Study Group, Sweden—J Adolfsson, J Bergh, T Bondesson, F Celebioglu, K Dahlberg, T Fornander, I Fredriksson, J Frisell, E Göransson, M Iliristo, U Johansson, E Lenner, L Löfgren, P Nikolaidis, L Perbeck, S Rotstein, K Sandelin, L Skoog, G Svane, E af Trampe, C Wadström.*  
*SUCCESS-Study Group, University of Düsseldorf, Germany—W Janni.*  
*Swiss Group for Clinical Cancer Research (SAKK), Bern, and OSAKO, St Gallen, Switzerland—M Castiglione, A Goldhirsch, R Maibach, H J Senn, B Thürlimann.*  
*Tampere University Hospital, Finland—M Hakama, K Holli, J Isola, K Rouhento, R Saaristo.*  
*Tel Aviv University, Israel—H Brenner, A Hercbergs.*  
*Tokyo Cancer Institute Hospital, Japan—M Yoshimoto.*  
*Toronto-Edmonton Breast Cancer Study Group, Canada—A H G Paterson, K I Pritchard.*  
*Toronto Princess Margaret Hospital, Canada—A Fyles, J W Meakin, T Panzarella, K I Pritchard.*  
*Tunis Institut Salah Azaiz, Tunisia—J Bahi.*  
*UK Multicentre Cancer Chemotherapy Study Group, London, UK—M Reid, M Spittle.*  
*UK/ANZ DCIS Trial—H Bishop, N J Bundred, J Cuzick, I O Ellis, I S Fentiman, J F Forbes, S Forsyth, W D George, S E Pinder, I Sestak.*  
*UK/Asia Collaborative Breast Cancer Group, London, UK—G P Deutsch, R Gray, D L W Kwong, V R Pai, R Peto, F Senanayake.*  
*Unicancer Breast Group—A L Martin, H Roché.*  
*University and Istituto Nazionale per la Ricerca sul Cancro, Genoa, Italy on behalf of GROCTA trialists—F Boccardo, A Rubagotti.*  
*University College London, UK—M Baum, S Forsyth, A Hackshaw, J Houghton, J Ledermann, K Monson, JS Tobias.*  
*University Federico II, Naples, Italy—C Carlomagno, M De Laurentiis, S De Placido.*  
*University of Edinburgh, UK—L Williams.*  
*University of Michigan, USA—D Hayes, L J Pierce.*  
*University of Texas MD Anderson Cancer Center, Houston, TX, USA—K Broglio, A U Buzdar, L Hsu.*  
*University of Wisconsin, USA—R R Love.*  
*Uppsala-Örebro Breast Cancer Study Group, Sweden—J Ahlgren, H Garmo, L Holmberg, G Liljegren, H Lindman, F Wärnberg.*  
*U.S. Oncology, Houston, USA—L Asmar, S E Jones.*  
*West German Study Group (WSG), Germany—O Gluz, N Harbeck, C Liedtke, U Nitz.*  
*West of Scotland Breast Trial Group, Glasgow, UK—A Litton.*  
*West Sweden Breast Cancer Study Group, Gothenburg, Sweden—A Wallgren, P Karlsson, B K Linderholm.*  
*Western Cancer Study Group, Torrance, CA, USA—R T Chlebowski.*  
*Würzburg University, Germany—H Caffier*
